# Supplementary material for: Using population-wide administrative and laboratory data to estimate type- and subtype-specific influenza vaccine effectiveness: a surveillance protocol
Source: PubMed Central journal article supplement — BMJ Open. 2019 Sep 30;9(9):e029708. doi: 10.1136/bmjopen-2019-029708 (PMC6773297; doi:10.1136/bmjopen-2019-029708), 2019-09-30
Supplement: bmjopen-2019-029708.draft_revisions.pdf [file bmjopen-2019-029708.draft_revisions.pdf]

# BMJ Open

BMJ Open is committed to open peer review. As part of this commitment we make the peer review history of every article we publish publicly available.

When an article is published we post the peer reviewers' comments and the authors' responses online. We also post the versions of the paper that were used during peer review. These are the versions that the peer review comments apply to.

The versions of the paper that follow are the versions that were submitted during the peer review process. They are not the versions of record or the final published versions. They should not be cited or distributed as the published version of this manuscript.

BMJ Open is an open access journal and the full, final, typeset and author-corrected version of record of the manuscript is available on our site with no access controls, subscription charges or pay-per-view fees (<http://bmjopen.bmj.com>).

If you have any questions on BMJ Open's open peer review process please email [info.bmjopen@bmj.com](mailto:info.bmjopen@bmj.com)

# BMJ Open

## Using population-wide administrative and laboratory data to estimate type- and subtype-specific influenza vaccine effectiveness: a surveillance protocol

|                               |                                                                                                                                                                                                                                                                                                                                                                                                                                                                                                                                                                                                                                                    |
|-------------------------------|----------------------------------------------------------------------------------------------------------------------------------------------------------------------------------------------------------------------------------------------------------------------------------------------------------------------------------------------------------------------------------------------------------------------------------------------------------------------------------------------------------------------------------------------------------------------------------------------------------------------------------------------------|
| Journal:                      | <i>BMJ Open</i>                                                                                                                                                                                                                                                                                                                                                                                                                                                                                                                                                                                                                                    |
| Manuscript ID                 | bmjopen-2019-029708                                                                                                                                                                                                                                                                                                                                                                                                                                                                                                                                                                                                                                |
| Article Type:                 | Protocol                                                                                                                                                                                                                                                                                                                                                                                                                                                                                                                                                                                                                                           |
| Date Submitted by the Author: | 07-Feb-2019                                                                                                                                                                                                                                                                                                                                                                                                                                                                                                                                                                                                                                        |
| Complete List of Authors:     | <p>Scott, Allison; Government of Alberta, Ministry of Health; PolicyWise for Children &amp; Families</p> <p>Buchan, Sarah; Institute for Clinical Evaluative Sciences; Public Health Ontario</p> <p>Kwong, Jeff; Institute for Clinical Evaluative Sciences</p> <p>Drews, Steven; Alberta Provincial Laboratory for Public Health; University of Alberta, Division of Preventive Medicine</p> <p>Simmonds, Kimberley; Alberta Ministry of Health, Epidemiology and Surveillance</p> <p>Svenson, Lawrence; Government of Alberta, Ministry of Health; University of Calgary Cumming School of Medicine, Department of Community Health Sciences</p> |
| Keywords:                     | Influenza, Vaccine effectiveness, Case Control, Test-negative, Administrative data, Population-level                                                                                                                                                                                                                                                                                                                                                                                                                                                                                                                                               |
|                               |                                                                                                                                                                                                                                                                                                                                                                                                                                                                                                                                                                                                                                                    |

SCHOLARONE™  
Manuscripts

1  
2  
3 1 **TITLE**

4  
5 2 **Using population-wide administrative and laboratory data to estimate type- and subtype-specific**  
6 3 **influenza vaccine effectiveness: a surveillance protocol**

7  
8 4 Allison N Scott<sup>1,2,3</sup>

9  
10 5 Sarah A Buchan<sup>4,5,6</sup>

11  
12 6 Jeffrey C Kwong<sup>4,5,6,7,8</sup>

13  
14 7 Steven J Drews<sup>9,10</sup>

15  
16 8 Kimberley A Simmonds<sup>1,11</sup>

17  
18 9 Lawrence W Svenson<sup>1,11, 12, 13</sup>

19  
20  
21 10

22 11 **Affiliations**

23  
24 12 <sup>1</sup>Ministry of Health, Government of Alberta, Edmonton, AB, Canada

25  
26 13 <sup>2</sup>PolicyWise for Children & Families, Edmonton, AB, Canada

27  
28 14 <sup>3</sup>Department of Public Health, Concordia University of Edmonton, AB, Canada

29  
30 15 <sup>4</sup>Institute for Clinical Evaluative Sciences, Toronto, ON, Canada

31  
32 16 <sup>5</sup>Public Health Ontario, Toronto, ON, Canada

33  
34 17 <sup>6</sup>Dalla Lana School of Public Health, University of Toronto, Toronto, ON, Canada

35  
36 18 <sup>7</sup>Department of Family & Community Medicine, University of Toronto, Toronto, ON, Canada

37  
38 19 <sup>8</sup>University Health Network, Toronto, ON, Canada

39  
40 20 <sup>9</sup>The Alberta Provincial Laboratory for Public Health, Edmonton, AB, Canada

41  
42 21 <sup>10</sup>Department of Laboratory Medicine & Pathology, University of Alberta, Edmonton, AB, Canada

43  
44 22 <sup>11</sup> Department of Community Health Sciences, Cumming School of Medicine, University of Calgary, Calgary,  
45 23 AB, Canada

46  
47 24 <sup>12</sup> School of Public Health, University of Alberta, Edmonton, AB, Canada

48  
49 25 <sup>13</sup> Division of Preventive Medicine, University of Alberta, Edmonton, AB, Canada

50  
51  
52 26

53  
54 27 **Corresponding Author:**

55  
56 28 Allison N. Scott, Ph.D.

1  
2  
3 29 PolicyWise for Children & Families  
4  
5 30 1000, 9925-109 Street NW  
6  
7 31 Edmonton, Alberta, Canada T5K 2J8  
8

9 32

10  
11 33 **Email Addresses**

12  
13 34 Allison N Scott AScott@policywise.com  
14  
15 35 Sarah A Buchan Sarah.Buchan@oahpp.ca  
16  
17 36 Jeffrey C Kwong jeff.kwong@utoronto.ca  
18  
19 37 Steven J Drews steven.drews@blood.ca  
20  
21 38 Kimberley A Simmonds kimberley.simmonds@gov.ab.ca  
22  
23 39 Lawrence W Svenson larry.svenson@gov.ab.ca  
24

25 40

26  
27 41

28  
29 42 **Word Count:** 2,586  
30  
31  
32  
33  
34  
35  
36  
37  
38  
39  
40  
41  
42  
43  
44  
45  
46  
47  
48  
49  
50  
51  
52  
53  
54  
55  
56  
57  
58  
59  
60

1  
2  
3 **43 ABSTRACT**

4  
5 **44 Introduction**

6  
7 45 The appropriateness of using routinely collected laboratory data combined with administrative data for  
8  
9 46 estimating influenza vaccine effectiveness (VE) is still being explored. This paper outlines a protocol to  
10  
11 47 estimate influenza VE using linked laboratory and administrative data which could act as a companion to  
12  
13 48 estimates derived from other methods.

14  
15  
16 **49 Methods and Analysis**

17  
18 50 We will use the test-negative design to estimate VE for each influenza type/subtype and season. Province-  
19  
20 51 wide individual-level records of positive and negative influenza tests will be linked, by unique personal health  
21  
22 52 numbers, to administrative databases and vaccination records to determine covariates and influenza  
23  
24 53 vaccination status, respectively. Covariates of interests include age, sex, immunocompromising chronic  
25  
26 54 conditions, and healthcare setting. Cases will be defined based on an individual's first positive influenza test  
27  
28 55 during the season, and potential controls will be defined based on an individual's first negative influenza test  
29  
30 56 during the season. One control for each case will be randomly selected based on the week the specimen was  
31  
32 57 collected. We will estimate vaccine effectiveness using multivariable logistic regression.

33  
34  
35 **58 Ethics and Dissemination**

36  
37 59 Ethics approval was obtained from the University of Alberta's Health Research Ethics Board – Health Panel  
38  
39 60 under study ID Pro00075997. Results will be disseminated by public health officials in Alberta.

40  
41  
42 61

43  
44  
45 62

46  
47  
48 63

1  
2  
3 64 **Key Words**  
4

5 65 Influenza  
6

7 66 Vaccine effectiveness  
8

9 67 Case Control  
10

11 68 Test-negative  
12

13 69 Administrative data  
14

15 70 Population-level  
16

17 71 Laboratory data  
18

19 72 Vaccination database  
20

21 73  
22  
23  
24  
25  
26  
27  
28  
29  
30  
31  
32  
33  
34  
35  
36  
37  
38  
39  
40  
41  
42  
43  
44  
45  
46  
47  
48  
49  
50  
51  
52  
53  
54  
55  
56  
57  
58  
59  
60

For peer review only

1  
2  
3  
4  
5  
6  
7  
8  
9  
10  
11  
12  
13  
14  
15  
16  
17  
18  
19  
20  
21  
22  
23  
24  
25  
26  
27  
28  
29  
30  
31  
32  
33  
34  
35  
36  
37  
38  
39  
40  
41  
42  
43  
44  
45  
46  
47  
48  
49  
50  
51  
52  
53  
54  
55  
56  
57  
58  
59  
60

74 **ARTICLE SUMMARY**

75 **Strengths and limitations of this study**

- 76 • This protocol describes near real time estimation of vaccine effectiveness to assist public health in  
77 allocating resources and determining the appropriate policies and public messaging during the  
78 influenza season.
- 79 • Vaccine effectiveness estimates use a test negative design, taking advantage of linked administrative  
80 health records for the entire population.
- 81 • While many confounders are included in the vaccine effectiveness estimates, not all known  
82 confounders can be measured using administrative health data.

83

For peer review only

## 84 INTRODUCTION

85 Influenza is a respiratory viral pathogen associated with significant morbidity and mortality globally.  
86 Infections range from relatively mild presentations (e.g. cough, sore throat) to severe lower respiratory tract  
87 infections (e.g. pneumonia). Severe cases may be associated with hospitalization, intensive care admission, and  
88 death; young children, the elderly, and individuals with chronic conditions are at highest risk of severe  
89 outcomes [1]. In Canada, rates of influenza infections are approximately 200 cases per 100,000 population,  
90 with about 50% of cases occurring in patients aged  $\leq 18$  years [2]. The causative agents, influenza A (subtypes  
91 H3N2 and H1N1pdm(09)) and influenza B (Yamagata and Victoria lineages), are under strong selective  
92 pressure to mutate genetically; significant genetic changes can occur in relatively short periods of time (i.e. <1  
93 year) [3].

94 Influenza prevention relies, in part, on annual vaccination campaigns that rely on vaccine strains selected  
95 approximately 9 months prior to the onset of an influenza season; by the time the vaccines are administered,  
96 the predominant circulating strains may have mutated to the point such that the effectiveness of the vaccine  
97 has diminished or has become completely ineffective [4, 5].

98 Influenza VE is commonly estimated using the test-negative design, a variation of the case-control design  
99 where cases and controls are selected from a pool of individuals who have been tested for influenza [6-10].

100 Several research groups use sentinel physician networks to recruit patients: influenza testing is performed on  
101 patients who meet a case definition for influenza-like illness, and cases and controls are selected from that  
102 pool [6-8]. While this has become an established method, there are some limitations to using sentinel  
103 physicians. As the physicians are often volunteers, there can be bias in the geographic distribution, leading to  
104 clustering of sampling in certain areas and not others. This can lead to inaccuracies as predominant  
105 circulating influenza strains vary geographically [7, 11]. Immunization information is commonly self-reported,  
106 potentially leading to recall and social desirability biases [12]; volunteer physicians may be more likely to have  
107 strong views on influenza immunization, potentially making it more difficult for the patient to admit to not  
108 being immunized. Finally, as these studies are labour-intensive for clinic staff, physician recruitment is often



1  
2  
3 109 low, resulting in small sample sizes and wide confidence intervals. Estimates are, therefore, typically available  
4  
5 110 after the peak of the influenza season, decreasing their usefulness for public health messaging and resource  
6  
7 111 and operational planning [6-8, 11].  
8  
9

10 112 Using administrative data and routinely collected clinical specimens for estimating VE is currently under  
11  
12 113 debate [13]. However, estimating VE in a large jurisdiction with near-real-time data on all influenza laboratory  
13  
14 114 testing and influenza vaccination in the population has the potential to provide more precise and timely VE  
15  
16 115 estimates than has previously been possible. We present a protocol to estimate influenza VE using  
17  
18 116 individually-linked laboratory and administrative data.  
19  
20

21 117  
22  
23

## 24 118 **METHODS AND ANALYSIS**

25  
26

### 27 119 **Study Setting:**

28  
29

30 120 Alberta is a province in Canada with a publicly-funded universal health care system; each of the 4.25 million  
31  
32 121 residents is assigned a unique personal health number (PHN) at birth or upon immigration to the province  
33  
34 122 [14]. The PHN is recorded each time a person accesses the healthcare system, allowing for deterministic  
35  
36 123 linkage across multiple administrative data sets held by the Ministry of Health.  
37  
38

39 124 In 2009, influenza vaccination became universally available to all Albertans aged  $\geq 6$  months, regardless of  
40  
41 125 comorbidities or other risk conditions [15]. Influenza vaccines are available at no cost to the patient at public  
42  
43 126 health clinics, pharmacies, physician offices, long-term care facilities, university health centers, and  
44  
45 127 workplaces. Annual vaccine campaigns begin in October, with approximately 60% of all influenza  
46  
47 128 vaccinations given by the end of the second week of the campaign. While the peak of influenza activity has  
48  
49 129 varied widely since 2010, the median influenza peak in Alberta is in mid-January, approximately three months  
50  
51 130 after vaccination campaigns begin.  
52  
53

54 131  
55  
56  
57  
58  
59  
60

### 132 **Laboratory methods for influenza A and B detection and influenza A subtyping**

133 All influenza testing in Alberta is performed at a single diagnostic lab, the Provincial Laboratory for Public  
134 Health (ProvLab) and stored in a single laboratory information system, along with test and patient identifiers.  
135 Prior to May 2017 a real-time influenza A/B reverse-transcriptase PCR (RT-PCR) was used to diagnose  
136 influenza using a protocol previously described [16, 17]. After May 2017, ProvLab has been using a Luminex  
137 Respiratory Pathogen Panel for the identification of influenza A (including subtype), influenza B, and other  
138 respiratory viruses (e.g. coronavirus and parainfluenza) [14].

### 140 **Study Design:**

141 We will use the test-negative design to estimate VE. We will estimate VE for the upcoming influenza season  
142 (2018/19) and past influenza seasons (2011/12 to 2016/17). The results of all respiratory virus tests  
143 conducted at ProvLab will be sent to the Ministry of Health for deterministic linkage to health administrative  
144 databases, in order to determine eligibility for inclusion in the analysis, influenza vaccination status, and the  
145 following covariates: age, sex, socio-economic status, geographic zone of residence, history of  
146 immunocompromising comorbidities, and healthcare setting (inpatient or outpatient setting) at the time of  
147 specimen submission. The presence of a diagnostic code for an acute respiratory illness (ARI) at the time of  
148 specimen collection will be used in a sensitivity analysis.

149 Isolates will be considered eligible for inclusion in the analysis if they met all of the following criteria: a valid  
150 PHN is recorded, the isolate is not from a resident of a long-term care facility, if the seasonal threshold has  
151 been reached, and the isolate was collected at least four weeks after the initiation of the public influenza  
152 vaccination program [18-20].

153 It is important to ensure that the population has the chance to be exposed to influenza and there is sufficient  
154 time for immunity to be developed. Residence in a long-term care facility will be determined via the Alberta  
155 Continuing Care Information System (ACCIS), which contains information on admissions and discharges  
156 from long-term care facilities [21]. PHN validity will be assessed using the Alberta Health Care Insurance

1  
2  
3 157 Plan (AHCIP) Adjusted Population Registry, which contains records of all individuals registered for  
4  
5 158 healthcare insurance [21, 22].  
6  
7

8 159 Individuals can have multiple laboratory tests over the course of their illness; therefore only the first positive  
9  
10 160 influenza test during the influenza season will be used, and potential control samples will be selected from  
11  
12 161 among those who only tested negative for influenza during that influenza season, using the first negative test.  
13  
14 162 Cases and controls tested <14 days after vaccination will be excluded from the analysis.  
15  
16

17 163 Influenza vaccination status will be determined from the Influenza Vaccination Registry. The registry  
18  
19 164 combines data from four databases that record influenza vaccination events (see below).  
20  
21

22 165 The following administrative data sets will be used in this study:  
23  
24

- 25 166 • Alberta Health Immunization and Adverse Reaction to Immunization system (Imm/ARI) contains  
26  
27 167 records of all publicly funded vaccines administered through public health, including influenza  
28  
29 168 vaccines administered at mass influenza vaccination clinics, public health clinics, and vaccinations  
30  
31 169 administered by public health nurses in long-term care facilities. Data submission is mandatory and  
32  
33 170 guidelines exist to support complete and accurate vaccination records with descriptions of each,  
34  
35 171 including notes [23, 24].
- 37 172 • The Supplemental Enhance Service Event (SESE) database captures physician claims for billing  
38  
39 173 purposes; International Classification of Diseases, Ninth Revision (ICD-9) diagnosis codes,  
40  
41 174 procedure codes, and codes indicating location of service delivery are mandatory data elements for  
42  
43 175 each patient encounter [22, 25, 26].
- 46 176 • Alberta Blue Cross (ABC) administers the pharmacist component of the universal vaccination  
47  
48 177 program. Pharmacists administering influenza vaccines through this program bill ABC for each  
49  
50 178 vaccine provided; they are required to submit patient information such as PHN, name, and address.
- 52 179 • The Pharmaceutical Information Network (PIN) database records privately dispensed  
53  
54 180 pharmacological products, including the rare instances when an influenza vaccine is purchased rather  
55  
56  
57  
58  
59  
60

1  
2  
3 181 than administered through the public program (e.g. purchased by travelers prior to the launch of the  
4  
5 182 public campaign). PIN captures dispensed events from >95% of pharmacists[21].  
6

- 7 183 • Provincial Vaccine Registry combines influenza vaccinations given in the province and recorded in  
8  
9 184 four source databases (PIN, ABC, SESE and Imm/ARI).  
10  
11 185 • Alberta Health Care Insurance Plan Adjusted Population Registry (AHCIP) Adjusted Population  
12  
13 186 Registry contains demographic variables, age, sex, socio-economic status, and geographic zone of  
14  
15 187 residence.  
16  
17 188 • Morbidity and Ambulatory Care Abstracting Reporting (MACAR) system contains diagnosis codes,  
18  
19 189 procedure codes, the date of admission, and date of discharge for every visit to hospitals, emergency  
20  
21 190 rooms, and outpatient clinics.  
22  
23  
24

25 191 Individuals will be considered inpatients if they have at least one physician claim for inpatient services on  
26  
27 192 the same day as specimen collection or if specimen collection occurred during an inpatient stay; all others  
28  
29 193 will be considered outpatients. Individuals with an immunocompromising condition will be defined as  
30  
31 194 those who have a diagnosis of HIV, who received an organ transplant, or received oral corticosteroids  
32  
33 195 (for  $\geq 30$  days), antineoplastic agents, or another immunocompromising drug from a community  
34  
35 196 pharmacist in the past 6 months. (Appendix 1 and 2) [27]. HIV diagnosis and acute respiratory illness will  
36  
37 197 be determined through physician claims and MACAR. Organ transplantation will be determined using  
38  
39 198 MACAR, and immunocompromising drug dispensations will be identified through PIN.  
40  
41

## 42 199 **Statistical Analysis**

43  
44

45 200 We will use multivariable logistic regression to estimate influenza vaccine effectiveness as  $(1 - \text{adjusted OR}) \times$   
46  
47 201 100%. We will estimate VE separately by influenza season and influenza subtype (i.e., A(H3N2),  
48  
49 202 A(H1N1)pdm09, and influenza B) [28]. All covariates will be considered for the adjusted model. SAS version  
50  
51 203 9.4 will be used for all statistical analysis (SAS Institute Inc, Cary, NC). VE estimates will be compared to  
52  
53 204 published estimates of VE (12-14).  
54  
55  
56  
57  
58  
59  
60

1  
2  
3 205 As shedding of influenza virus continues for approximately 4-5 days after symptom onset, bias can result if  
4  
5 206 specimens that are collected too long after symptom onset are used [29]. Most studies use a threshold of 7  
6  
7 207 days [30]. To test the robustness of the findings, a sensitivity analysis will be performed; controls will be  
8  
9 208 restricted to those specimens positive for a different respiratory virus (i.e. coronavirus, human respiratory  
10  
11 209 syncytial virus) (As suggested by Sullivan et al 2016).

12  
13  
14 210 A potential limitation to this study is that the samples utilized here are clinical isolates taken through the  
15  
16 211 course of normal patient care, and are not from a standard case definition as is utilized in some other studies  
17  
18 212 [12]. To test the robustness of the findings, the analysis will be repeated using only cases and controls that  
19  
20 213 were given a diagnosis code for acute respiratory infection on the same day as specimen collection, as per the  
21  
22 214 SESE database or MACAR. Appendix 3 lists the ICD-9 and ICD-10 codes used to define an acute respiratory  
23  
24 215 infection.

26  
27 216

## 29 217 **DISCUSSION**

30  
31 218 This protocol describes the estimation of seasonal influenza VE using specimens collected for routine  
32  
33 219 influenza diagnostics as well as administrative data and vaccination records.

34  
35  
36 220 A key strength of this approach is the large sample size. This approach allows calculation of near real-time,  
37  
38 221 precise influenza VE estimates weeks prior to the influenza season peak, creating an early warning system for  
39  
40 222 public health if, as in the 2014-2015 season, the vaccine is found to have exceedingly low effectiveness. Early  
41  
42 223 notification of VE can assist public health in determining policies, messaging, and allocation of resources  
43  
44 224 (antiviral agents, staffing emergency departments) to counter a potentially more severe influenza season [31,  
45  
46 225 32]. The large sample size also allows for stratified analyses of VE based on product, age group, or region.

47  
48  
49 226 Whereas sentinel physician networks rely primarily on self-reported measures of influenza vaccination [33], a  
50  
51 227 significant strength of this study is the use of the near-real-time influenza vaccination registry that contains  
52  
53 228 individual-level, linkable data for most influenza vaccinations administered in the province. Use of this  
54  
55 229 registry reduces the likelihood of recall error and information biases such as social desirability bias and

1  
2  
3 230 reduces non-differential misclassification, which would bias the odds ratio towards the null, thus  
4  
5 231 underestimating VE [12].  
6  
7

8 232 Finally, we are certain to capture the results of all respiratory virus testing in the province, as all respiratory  
9  
10 233 virus testing is centralized at ProvLab and there is limited use of point-of-care testing.  
11  
12

13 234 There are some limitations to this methodology compared to the traditional method of VE estimation using  
14  
15 235 sentinel physician networks, because a standardized clinical case definition cannot be applied to determine  
16  
17 236 study eligibility. A sensitivity analysis restricting to healthcare encounters with a diagnosis code for acute  
18  
19 237 respiratory infection will be used as a proxy for a standard case definition.  
20  
21

22 238 While the inclusion of confounders is important for VE estimate adjustment, not all known confounders can  
23  
24 239 be measured using administrative data. Frailty has been demonstrated to be a potential confounder of VE  
25  
26 240 [34-36]. Frailty cannot be included in the multivariable model because no validated indices of frailty generated  
27  
28 241 from standard administrative data exist at this time. However, this may not affect the results significantly as a  
29  
30 242 previous study indicated that inclusion of frailty in the multivariate model increased VE estimates only slightly  
31  
32 243 [37].  
33  
34

35 244 Laboratory requisitions in Alberta do not contain onset date. Ideally this would be used to ensure that the  
36  
37 245 negative laboratory test results were representative of an acute infectious period and that test-negative  
38  
39 246 specimens were not collected after viral shedding had ceased. Sullivan et al 2016 have indicated this bias may  
40  
41 247 be accounted for by selecting influenza test-negative controls that were positive for another respiratory virus.  
42  
43 248 Requiring controls to be positive for another virus excludes individuals who are tested long after their acute  
44  
45 249 infectious period. However, a recent systematic review found no differences when using different groups of  
46  
47 250 controls [30].  
48  
49

50  
51 251 Comparison of the VE results using administrative data to previously published studies, specifically sentinel  
52  
53 252 surveillance for the same seasons (2011/12 – 2018/19) will help to identify further areas of refinement.  
54  
55  
56  
57  
58  
59  
60

1  
2  
3 253 This approach could successfully allow for the generation of early influenza VE estimates which could  
4  
5 254 facilitate tailoring of public health messaging and assist in public health operations planning for the peak of  
6  
7 255 the influenza season.  
8

9 256

## 11 257 **ETHICS**

13 258 Ethics approval was obtained from the University of Alberta's Health Research Ethics Board – Health Panel  
14  
15 259 under study ID Pro00075997.  
16

17 260

## 19 261 **LIST OF ABBREVIATIONS**

21 262 ABC – Alberta Blue Cross

23 263 ACCIS – Alberta Continuing Care Information System

25 264 AHCIP – Alberta Health Care Insurance Plan Adjusted Population Registry

27 265 CCI – Canadian Classification of Health Interventions

29 266 CCP – Canadian Classification of Diagnostic, Therapeutic, and Surgical Procedures

31 267 CIHI – Canadian Institute for Health Information

33 268 DAD – Alberta Hospital Discharge Abstract Database

35 269 ICD-9 – International Classification of Diseases, Ninth Revision

37 270 ICD-10 – International Classification of Diseases, Tenth Revision

39 271 Imm/ARI – Alberta Health Immunization and Adverse Reaction to Immunization system

41 272 MACAR – Morbidity and Ambulatory Care Abstracting Reporting

43 273 PHN – Personal Health Number

45 274 PIN – Pharmaceutical Information Network

47 275 ProvLab – Alberta Provincial Laboratory for Public Health

49 276 RT-PCR – Reverse Transcriptase Polymerase Chain Reaction

51 277 SESE – Supplemental Enhance Service Event

53 278 VE – Vaccine Effectiveness  
54  
55  
56  
57  
58  
59  
60

1  
2  
3 **279 ETHICS APPROVAL AND CONSENT TO PARTICIPATE**  
4

5 280 Ethics approval was obtained from the University of Alberta's Health Research Ethics Board – Health Panel  
6  
7 281 under study ID Pro00075997.  
8

9 282

10  
11 **283 CONSENT FOR PUBLICATION**  
12

13 284 Not applicable  
14  
15

16 285

17  
18  
19 **286 AVAILABILITY OF DATA AND MATERIALS**  
20

21 287 Not applicable  
22  
23

24 288

25  
26 **289 COMPETING INTERESTS**  
27

28 290 The authors declare that they have no competing interests.  
29  
30

31 291

32  
33 **292 FUNDING**  
34

35 293 Not applicable  
36  
37

38 294

39  
40 **295 AUTHOR STATEMENT**

41 296 ANS and SJD conceived of and designed the protocol and drafted and revised the manuscript. KS and LS  
42 297 planned the original approach, providing guidance on available administrative database resources. SAB and  
43 298 JCK made substantial contributions to the design and critically revised the manuscript.  
44  
45

46 299

47  
48 **300 ACKNOWLEDGEMENTS**  
49

50 301 The authors would like to acknowledge the staff at Alberta Health Services and ProvLab for their assistance  
51 302 in providing administrative and laboratory data sources that could be implemented in this protocol.  
52

53 303  
54  
55  
56  
57  
58  
59  
60



304

305 **REFERENCES**

- 306 1. Mertz D, Kim TH, Johnstone J, Lam PP, Science M, Kuster SP, Fadel SA, Tran D, Fernandez E,  
307 Bhatnagar N, Loeb M. Populations at risk for severe or complicated influenza illness: systematic  
308 review and meta-analysis. *BMJ*. 2013; 347:f5061.
- 309 2. Alberta Health Services. Edmonton, AB: Alberta Health Services; 2017.
- 310 3. Wong SS, Webby RJ. Traditional and new influenza vaccines. *Clin Microbiol Rev*. 2013; 26:476-492.
- 311 4. Skowronski DM, Chambers C, Sabaiduc S, De SG, Winter AL, Dickinson JA, Kraiden M, Gubbay  
312 JB, Drews SJ, Martineau C, Eshaghi A, Kwindt TL, Bastien N, Li Y. A Perfect Storm: Impact of  
313 Genomic Variation and Serial Vaccination on Low Influenza Vaccine Effectiveness During the 2014-  
314 2015 Season. *Clin Infect Dis* 2016; 63:21-32.
- 315 5. World Health Organization. Influenza Update 309. World Health Organization; 2017.
- 316 6. Skowronski DM, De SG, Crowcroft NS, Janjua NZ, Boulianne N, Hottes TS, Rosella LC, Dickinson  
317 JA, Gilca R, Sethi P, Ouhoummane N, Willison DJ, Rouleau I, Petric M, Fonseca K, Drews SJ,  
318 Rebbapragada A, Charest H, Hamelin ME, Boivin G, Gardy JL, Li Y, Kwindt TL, Patrick DM,  
319 Brunham RC. Association between the 2008-09 seasonal influenza vaccine and pandemic H1N1  
320 illness during Spring-Summer 2009: four observational studies from Canada. *PLoS Med*. 2010;  
321 7:e1000258.
- 322 7. Chambers C, Skowronski DM, Sabaiduc S, Winter AL, Dickinson JA, De SG, Gubbay JB, Drews SJ,  
323 Martineau C, Eshaghi A, Kraiden M, Bastien N, Li Y. Interim estimates of 2015/16 vaccine  
324 effectiveness against influenza A(H1N1)pdm09, Canada, February 2016. *Euro Surveill*. 2016;  
325 21:30168.
- 326 8. Kwong JC, Campitelli MA, Gubbay JB, Peci A, Winter AL, Olsha R, Turner R, Rosella LC,  
327 Crowcroft NS. Vaccine effectiveness against laboratory-confirmed influenza hospitalizations among  
328 elderly adults during the 2010-2011 season. *Clin Infect Dis*. 2013; 57:820-827.
- 329 9. Orenstein WA, Bernier RH, Dondero TJ, Hinman AR, Marks JS, Bart KJ, Sirotkin B. Field  
330 evaluation of vaccine efficacy. *Bull World Health Organ*. 1985; 63:1055-1068.
- 331 10. Public Health Agency of Canada. Effectiveness of vaccine against medical consultation due to  
332 laboratory-confirmed influenza: results from a sentinel physician pilot project in British Columbia,  
333 2004-2005. *Can Commun Dis Rep*. 2005; 31:181-191.
- 334 11. Skowronski DM, Chambers C, Sabaiduc S, Dickinson JA, Winter AL, De SG, Drews SJ, Jassem A,  
335 Gubbay JB, Charest H, Balshaw R, Bastien N, Li Y, Kraiden M. Interim estimates of 2016/17  
336 vaccine effectiveness against influenza A(H3N2), Canada, January 2017. *Euro Surveill*. 2017; 22.
- 337 12. World Health Organization. Evaluation of influenza vaccine effectiveness: a guide to the design and  
338 interpretation of observational studies. World Health Organization; 2017.

- 1  
2  
3 339 13. Belongia EA, Simpson MD, King JP, Sundaram ME, Kelley NS, Osterholm MT, McLean HQ.  
4 340 Variable influenza vaccine effectiveness by subtype: a systematic review and meta-analysis of test-  
5 341 negative design studies. *Lancet Infect Dis.* 2016; 16:942-951.  
6  
7 342 14. Fathima S, Simmonds K, Invik J, Scott AN, Drews S. Use of laboratory and administrative data to  
8 343 understand the potential impact of human parainfluenza virus 4 on cases of bronchiolitis, croup, and  
9 344 pneumonia in Alberta, Canada. *BMC Infect Dis.* 2016; 16:402.  
10  
11 345 15. Alberta Health: History of immunization in Alberta. Edmonton, AB: Government of Alberta; 2017.  
12  
13 346 16. Pabbaraju K, Wong S, Wong AA, Appleyard GD, Chui L, Pang XL, Yanow SK, Fonseca K, Lee BE,  
14 347 Fox JD, Preiksaitis JK. Design and validation of real-time reverse transcription-PCR assays for  
15 348 detection of pandemic (H1N1) 2009 virus. *J Clin Microbiol.* 2009; 47:3454-3460.  
16  
17 349 17. Chaudhry A, Bastien N, Li Y, Scott A, Pabbaraju K, Stewart D, Wong S, Drews SJ. Influenza Other  
18 350 Respir Viruses. 2016; 10:532-535.  
19  
20 351 18. World Health Organization. Global epidemiological surveillance standards for influenza. World  
21 352 Health Organization; 2013.  
22  
23 353 19. World Health Organization. A manual for estimating disease burden associated with seasonal  
24 354 influenza.; World Health Organization; 2015.  
25  
26 355 20. Alberta Health. Seasonal Influenza in Alberta 2016/2017 Summary Report. Alberta Health,  
27 356 Edmonton, AB: Government of Alberta; 2017.  
28  
29 357 21. Government of Alberta. Overview of administrative health datasets. Edmonton, AB: Government of  
30 358 Alberta; 2017.  
31  
32 359 22. Russell ML, Schopflocher DP, Svenson L, Virani SN. Secular trends in the epidemiology of shingles  
33 360 in Alberta. *Epidemiol Infect.* 2007; 135:908-913.  
34  
35 361 23. Government of Alberta: Immunization data submission and response guidelines. Version 5.9.  
36 362 Edmonton, AB: Government of Alberta; 2017.  
37  
38 363 24. MacDonald SE, Dover DC, Simmonds KA, Svenson LW. Risk of febrile seizures after first dose of  
39 364 measles-mumps-rubella-varicella vaccine: a population-based cohort study. *CMAJ.* 2014; 186:824-  
40 365 829.  
41  
42 366 25. Alberta Health: Alberta Health Claims Assessment. 2017.  
43 367 <https://open.alberta.ca/publications/alberta-health-diagnostic-codes>. Accessed Feb 23, 2018.  
44  
45 368 26. Lix LM, Walker R, Quan H, Nesdole R, Yang J, Chen G, CHEP-ORTF. Hypertension Outcomes  
46 369 and Surveillance Team. Hypertension Outcomes and Surveillance Team: Features of physician  
47 370 services databases in Canada. *Chronic Diseases and Injuries in Canada.* 2012; 32.  
48  
49 371 27. Schwartz KL, Jembere N, Campitelli MA, Buchan SA, Chung H, Kwong JC. Using physician billing  
50 372 claims from the Ontario Health Insurance Plan to determine individual influenza vaccination status:  
51 373 an updated validation study. *CMAJ Open.* 2016; 4:E463-E470.  
52  
53 374 28. Sullivan SG, Cowling BJ. "Crude Vaccine Effectiveness" Is a Misleading Term in Test-negative  
54 375 Studies of Influenza Vaccine Effectiveness. *Epidemiology.* 2015; 26:e60.  
55  
56  
57  
58  
59  
60

- 1  
2  
3 376 29. Sullivan SG, Tchetgen Tchetgen EJ, Cowling BJ. Theoretical Basis of the Test-Negative Study  
4 377 Design for Assessment of Influenza Vaccine Effectiveness. *Am J Epidemiol.* 2016; 184:345-353.  
5  
6 378 30. Feng S, Cowling BJ, Kelly H, Sullivan SG. Estimating Influenza Vaccine Effectiveness With the  
7 379 Test-Negative Design Using Alternative Control Groups: A Systematic Review and Meta-Analysis.  
8 380 *Am J Epidemiol.* 2018; 187:389-397.  
9  
10 381 31. Orton L, Lloyd-Williams F, Taylor-Robinson D, O'Flaherty M, Capewell S. The use of research  
11 382 evidence in public health decision making processes: systematic review. *PLoS One.* 2011; 6:e21704.  
12  
13 383 32. Savel TG, Foldy S. The role of public health informatics in enhancing public health surveillance.  
14 384 *MMWR Suppl.* 2012; 61:20-24.  
15  
16 385 33. Skowronski DM, Janjua NZ, De SG, Sabaiduc S, Eshaghi A, Dickinson JA, Fonseca K, Winter AL,  
17 386 Gubbay JB, Kraiden M, Petric M, Charest H, Bastien N, Kwindt TL, Mahmud SM, Van CP, Li Y.  
18 387 Low 2012-13 influenza vaccine effectiveness associated with mutation in the egg-adapted H3N2  
19 388 vaccine strain not antigenic drift in circulating viruses. *PLoS One.* 2014; 9:e92153.  
20  
21 389 34. Nelson JC, Jackson ML, Weiss NS, Jackson LA. New strategies are needed to improve the accuracy  
22 390 of influenza vaccine effectiveness estimates among seniors. *J Clin Epidemiol.* 2009; 62:687-694.  
23  
24 391 35. Jackson LA, Jackson ML, Nelson JC, Neuzil KM, Weiss NS. Evidence of bias in estimates of  
25 392 influenza vaccine effectiveness in seniors. *Int J Epidemiol.* 2006; 35:337-344.  
26  
27 393 36. Jackson LA, Nelson JC, Benson P, Neuzil KM, Reid RJ, Psaty BM, Heckbert SR, Larson EB, Weiss  
28 394 NS. Functional status is a confounder of the association of influenza vaccine and risk of all cause  
29 395 mortality in seniors. *Int J Epidemiol.* 2006; 35:345-352.  
30  
31 396 37. Talbot HK, Nian H, Chen Q, Zhu Y, Edwards KM, Griffin MR. Evaluating the case-positive,  
32 397 control test-negative study design for influenza vaccine effectiveness for the frailty bias. *Vaccine.*  
33 398 2016; 34:1806-1809.  
34 399  
35 400  
36  
37  
38 401

1  
2  
3 **402 Appendix 1. List of CCP, CCI, and CMG codes utilized to define individuals who have had an organ**  
4  
5 **403 transplant**  
6  
7

8 **CCP Code Description**

|        |                                     |
|--------|-------------------------------------|
| 9 495  | Heart Transplantation               |
| 10 455 | Lung Transplant                     |
| 11 456 | Combined Heart-Lung Transplantation |
| 12 624 | Liver Transplant                    |
| 13 675 | Transplant of Kidney                |
| 14 648 | Transplant of Pancreas              |

16  
17 **CCI Code Description**

|          |                                       |
|----------|---------------------------------------|
| 18 1HY85 | Transplant, Heart With Lung(S)        |
| 19 1HZ85 | Transplant, Heart Nec                 |
| 20 1GT85 | Transplant, Lung Nec                  |
| 21 1GR85 | Transplant, Lobe of Lung              |
| 22 1OA85 | Transplant, Liver                     |
| 23 1PC85 | Transplant, Kidney                    |
| 24 1OJ85 | Transplant, Pancreas                  |
| 25 1OK85 | Transplant, Pancreas With Duodenum    |
| 26 1NK85 | Transplant, Small Intestine           |
| 27 1NP85 | Transplant, Small And Large Intestine |

29  
30 **CMG 1992 To 2005**

|        |                                        |
|--------|----------------------------------------|
| 31 175 | Heart or Lung Transplant               |
| 32 253 | Major Intestinal And Rectal Procedures |
| 33 310 | Liver Transplant                       |
| 34 311 | Major Pancreatic Procedures            |
| 35 500 | Kidney Transplant                      |

37  
38 **CMG 2007 To 2016**

|        |                                                      |
|--------|------------------------------------------------------|
| 39 110 | Lung Transplant                                      |
| 40 160 | Heart Transplant                                     |
| 41 220 | Major Upper Gastrointestinal Reconstruction/Excision |
| 42 270 | Liver/Pancreas/Duodenum Transplant                   |
| 43 450 | Kidney Transplant                                    |

44 404

46 405

49 406

## 407 Appendix 2. List of drug names and DINs utilized to define immunocompromising conditions

| DIN      | Drug Name                          | Route of Administration | Strength |
|----------|------------------------------------|-------------------------|----------|
| 00616192 | ETOPOSIDE                          | CAP                     | 50MG     |
| 00523410 | ETOPOSIDE                          | IV SOL                  | 20MG/ML  |
| 02080036 | ETOPOSIDE                          | IV SOL                  | 20MG/ML  |
| 02241182 | ETOPOSIDE                          | IV SOL                  | 20MG/ML  |
| 02231622 | IRINOTECAN HCL                     | IV SOL                  | 20MG/ML  |
| 02258218 | IRINOTECAN HCL                     | IV SOL                  | 20MG/ML  |
| 00015431 | VINBLASTINE SULFATE                | IV PWS                  | 1MG/ML   |
| 00611182 | VINCRISTINE SULFATE                | IV SOL                  | 1MG/ML   |
| 02143305 | VINCRISTINE SULFATE                | IV SOL                  | 1MG/ML   |
| 00004618 | BUSULFAN                           | TAB                     | 2MG      |
| 00297763 | CARMUSTINE                         | IV PWS                  | 100MG    |
| 09851399 | CARMUSTINE                         | TOP SOL                 | NOT AVLE |
| 00004626 | CHLORAMBUCIL                       | TAB                     | 2MG      |
| 00344915 | CYCLOPHOSPHAMIDE                   | INJ PWS                 | 2GM      |
| 00013544 | CYCLOPHOSPHAMIDE                   | IV PWS                  | 200MG    |
| 00013552 | CYCLOPHOSPHAMIDE                   | IV PWS                  | 200MG    |
| 02241797 | CYCLOPHOSPHAMIDE                   | IV PWS                  | 200MG    |
| 02241799 | CYCLOPHOSPHAMIDE                   | IV PWS                  | 1000MG   |
| 00013749 | CYCLOPHOSPHAMIDE                   | TAB                     | 50MG     |
| 00262676 | CYCLOPHOSPHAMIDE                   | TAB                     | 25MG     |
| 00344877 | CYCLOPHOSPHAMIDE                   | TAB                     | 25MG     |
| 00344885 | CYCLOPHOSPHAMIDE                   | TAB                     | 50MG     |
| 02241795 | CYCLOPHOSPHAMIDE                   | TAB                     | 25MG     |
| 02241796 | CYCLOPHOSPHAMIDE                   | TAB                     | 50MG     |
| 02063794 | ESTRAMUSTINE DISODIUM<br>PHOSPHATE | CAP                     | 140MG    |
| 00780278 | ESTRAMUSTINE PHOSPHATE             | CAP                     | 140MG    |
| 00360414 | LOMUSTINE                          | CAP                     | 100MG    |
| 00360422 | LOMUSTINE                          | CAP                     | 40MG     |
| 00360430 | LOMUSTINE                          | CAP                     | 10MG     |
| 00016063 | MECHLORETHAMINE                    | IV PWS                  | 10MG     |
| 00004715 | MELPHALAN                          | TAB                     | 2MG      |
| 02312794 | TEMOZOLOMIDE                       | CAP                     | 140MG    |
| 02312816 | TEMOZOLOMIDE                       | CAP                     | 180MG    |
| 02395274 | TEMOZOLOMIDE                       | CAP                     | 20MG     |
| 02395282 | TEMOZOLOMIDE                       | CAP                     | 100MG    |
| 02395290 | TEMOZOLOMIDE                       | CAP                     | 140MG    |
| 02395312 | TEMOZOLOMIDE                       | CAP                     | 250MG    |
| 02443473 | TEMOZOLOMIDE                       | CAP                     | 5MG      |
| 02443481 | TEMOZOLOMIDE                       | CAP                     | 20MG     |

| DIN      | Drug Name             | Route of Administration | Strength |
|----------|-----------------------|-------------------------|----------|
| 02443511 | TEMOZOLOMIDE          | CAP                     | 100MG    |
| 02443538 | TEMOZOLOMIDE          | CAP                     | 140MG    |
| 02443554 | TEMOZOLOMIDE          | CAP                     | 250MG    |
| 02241093 | TEMOZOLOMIDE          | CAP                     | 5MG      |
| 02241094 | TEMOZOLOMIDE          | CAP                     | 20MG     |
| 02241095 | TEMOZOLOMIDE          | CAP                     | 100MG    |
| 02241096 | TEMOZOLOMIDE          | CAP                     | 250MG    |
| 02441160 | TEMOZOLOMIDE          | CAPSULE                 | 5MG      |
| 00237035 | THIOTEPA              | INJ PWS                 | 15MG/ML  |
| 02421917 | CAPECITABINE          | FC TAB                  | 150MG    |
| 02421925 | CAPECITABINE          | FC TAB                  | 500MG    |
| 02426757 | CAPECITABINE          | FC TAB                  | 150MG    |
| 02426765 | CAPECITABINE          | FC TAB                  | 500MG    |
| 02400022 | CAPECITABINE          | TAB                     | 150MG    |
| 02400030 | CAPECITABINE          | TAB                     | 500MG    |
| 02238453 | CAPECITABINE          | TAB                     | 150MG    |
| 02238454 | CAPECITABINE          | TAB                     | 500MG    |
| 02022117 | CLADRIBINE            | IV SOL                  | 1MG      |
| 00194727 | CYTARABINE            | INJ PWS                 | 500MG    |
| 00386715 | CYTARABINE            | INJ PWS                 | 100MG    |
| 02167867 | CYTARABINE            | INJ PWS                 | 100MG    |
| 00646296 | CYTARABINE            | IV PWS                  | 1GM      |
| 00646318 | CYTARABINE            | IV PWS                  | 2GM      |
| 02246226 | FLUDARABINE PHOSPHATE | TAB                     | 10MG     |
| 00012882 | FLUOROURACIL          | IV SOL                  |          |
| 00330582 | FLUOROURACIL          | TOP CRM                 | 5%       |
| 00465283 | HYDROXYUREA           | CAP                     | 500MG    |
| 02242920 | HYDROXYUREA           | CAP                     | 500MG    |
| 02247937 | HYDROXYUREA           | CAP                     | 500MG    |
| 00004723 | MERCAPTOPYRINE        | TAB                     | 50MG     |
| 02415275 | MERCAPTOPYRINE        | TABLET                  | 50MG     |
| 09857520 | METHOTREXATE          | INJ SOL                 | 50MG/2ML |
| 02182777 | METHOTREXATE          | INJ SOL                 | 25MG/ML  |
| 02182955 | METHOTREXATE          | INJ SOL                 | 25MG/ML  |
| 00014915 | METHOTREXATE          | TAB                     | 2.5MG    |
| 02170698 | METHOTREXATE          | TAB                     | 2.5MG    |
| 02182750 | METHOTREXATE          | TAB                     | 10MG     |
| 02182963 | METHOTREXATE          | TAB                     | 2.5MG    |
| 02244798 | METHOTREXATE          | TAB                     | 2.5MG    |
| 02398427 | METHOTREXATE          | VIAL                    | 25MG/ML  |
| 00321397 | METHOTREXATE DISODIUM | INJ SOL                 | 2.5MG/ML |
| 00321400 | METHOTREXATE DISODIUM | INJ SOL                 | 2.5MG/ML |

1  
2  
3  
4  
5  
6  
7  
8  
9  
10  
11  
12  
13  
14  
15  
16  
17  
18  
19  
20  
21  
22  
23  
24  
25  
26  
27  
28  
29  
30  
31  
32  
33  
34  
35  
36  
37  
38  
39  
40  
41  
42  
43  
44  
45  
46  
47  
48  
49  
50  
51  
52  
53  
54  
55  
56  
57  
58  
59  
60

| DIN      | Drug Name              | Route of Administration | Strength   |
|----------|------------------------|-------------------------|------------|
| 02170663 | METHOTREXATE DISODIUM  | INJ SOL                 | 50MG/2ML   |
| 02170671 | METHOTREXATE DISODIUM  | INJ SOL                 | 2.5MG/ML   |
| 02182947 | METHOTREXATE SODIUM    | INJ SOL                 | 10MG/ML    |
| 00614335 | METHOTREXATE SODIUM    | IV SOL                  | 10MG/ML    |
| 00874132 | METHOTREXATE SODIUM    | TAB                     | 2.5MG      |
| 02171767 | METHOTREXATE SODIUM    | TAB                     | 2.5MG      |
| 00282081 | THIOGUANINE            | TAB                     | 40MG       |
| 02384256 | CRIZOTINIB             | CAP                     | 200MG      |
| 02384264 | CRIZOTINIB             | CAP                     | 250MG      |
| 02409607 | DABRAFENIB             | CAP                     | 50MG       |
| 02409615 | DABRAFENIB             | CAP                     | 75MG       |
| 02320193 | DASATINIB              | TAB                     | 100MG      |
| 02293129 | DASATINIB              | TAB                     | 20MG       |
| 02293137 | DASATINIB              | TAB                     | 50MG       |
| 02293145 | DASATINIB              | TAB                     | 70MG       |
| 02269007 | ERLOTINIB HCL          | TAB                     | 25MG       |
| 02269015 | ERLOTINIB HCL          | TAB                     | 100MG      |
| 02269023 | ERLOTINIB HCL          | TAB                     | 150MG      |
| 02377705 | ERLOTINIB HCL          | TABLET                  | 100MG      |
| 02377713 | ERLOTINIB HCL          | TABLET                  | 150MG      |
| 02434407 | IBRUTINIB              | CAP                     | 140MG      |
| 09857447 | IMATINIB MESYLATE      | TAB                     | 100MG      |
| 02388006 | RUXOLITINIB            | TAB                     | 5MG        |
| 02388014 | RUXOLITINIB            | TAB                     | 15MG       |
| 02388022 | RUXOLITINIB            | TAB                     | 20MG       |
| 02409658 | TRAMETINIB RECOMBINANT | TAB                     | 2MG        |
| 01926438 | ASPARAGINASE           | INJ PWS                 | 10MU       |
| 02389649 | AXITINIB               | TAB                     | 5MG        |
| 02389630 | AXITINIB               | TAB FC                  | 1MG        |
| 02262452 | BORTEZOMIB             | IV PWS                  | 3.5MG      |
| 00521183 | DACARBAZINE            | IV PWS                  | 200MG/VIAL |
| 02154854 | DACARBAZINE            | IV PWS                  | 200MG      |
| 02248676 | GEFITINIB              | TAB                     | 250MG      |
| 02244725 | IMATINIB MESYLATE      | CAP                     | 100MG      |
| 02399806 | IMATINIB MESYLATE      | FC TAB                  | 100MG      |
| 02355337 | IMATINIB MESYLATE      | TAB                     | 100MG      |
| 02355345 | IMATINIB MESYLATE      | TAB                     | 400MG      |
| 02397285 | IMATINIB MESYLATE      | TAB                     | 100MG      |
| 02397293 | IMATINIB MESYLATE      | TAB                     | 400MG      |
| 02399814 | IMATINIB MESYLATE      | TAB                     | 400MG      |
| 02431114 | IMATINIB MESYLATE      | TAB                     | 100MG      |
| 02431122 | IMATINIB MESYLATE      | TAB                     | 400MG      |

| DIN      | Drug Name              | Route of Administration | Strength   |
|----------|------------------------|-------------------------|------------|
| 09857448 | IMATINIB MESYLATE      | TAB                     | 400MG      |
| 02253275 | IMATINIB MESYLATE      | TAB                     | 100MG      |
| 02253283 | IMATINIB MESYLATE      | TAB                     | 400MG      |
| 02326442 | LAPATINIB DITOSYLATE   | TAB                     | 250MG      |
| 02315874 | NILOTINIB              | CAP                     | 200MG      |
| 02368250 | NILOTINIB              | CAP                     | 150MG      |
| 02352303 | PAZOPANIB HCL          | TAB                     | 200MG      |
| 00012750 | PROCARBAZINE HCL       | CAP                     | 50MG       |
| 02403390 | REGORAFENIB            | TAB                     | 40MG       |
| 02284227 | SORAFENIB TOSYLATE     | TAB                     | 200MG      |
| 02280795 | SUNITINIB MALATE       | CAP                     | 12.5MG     |
| 02280809 | SUNITINIB MALATE       | CAP                     | 25MG       |
| 02280817 | SUNITINIB MALATE       | CAP                     | 50MG       |
| 02258595 | ADALIMUMAB             | INJ-SC SOL              | 40MG       |
| 09854785 | ADALIMUMAB             | INJ-SC SOL              | 40MG       |
| 09857294 | ADALIMUMAB             | INJ-SC SOL              | 40MG       |
| 09857326 | ADALIMUMAB             | INJ-SC SOL              | 40MG       |
| 09857327 | ADALIMUMAB             | INJ-SC SOL              | 40MG       |
| 02130181 | ALDESLEUKIN            | IV PWS                  | 1.3MG      |
| 02331675 | CERTOLIZUMAB PEGOL     | INJ-SC SOL              | 200MG/ML   |
| 09857394 | ETANERCEPT RECOMBINANT | INJ SOL                 | 50MG/ML    |
| 02242903 | ETANERCEPT RECOMBINANT | INJ-SC PWS              | 25MG       |
| 02274728 | ETANERCEPT RECOMBINANT | INJ-SC SOL              | 50MG/ML    |
| 09857322 | ETANERCEPT RECOMBINANT | INJ-SC SOL              | 50MG/ML    |
| 02233014 | GLATIRAMER             | INJ-SC PWS              | 20MG       |
| 02245619 | GLATIRAMER             | INJ-SC SOL              | 20MG/ML    |
| 02324776 | GOLIMUMAB RECOMBINANT  | INJ-SC SOL              | 50MG/0.5ML |
| 02324784 | GOLIMUMAB RECOMBINANT  | INJ-SC SOL              | 50MG/0.5ML |
| 02244016 | INFLIXIMAB             | IV PWS                  | 100MG      |
| 09852956 | INFLIXIMAB             | IV PWS                  | 100MG      |
| 02419475 | INFLIXIMAB             | PWD VIAL                | 100MG      |
| 02239832 | INTERFERON             | INJ-SC SOL              | 0.03MG/ML  |
| 09852751 | INTERFERON             | OPH SOL                 | 1MU/ML     |
| 02223384 | INTERFERON ALFA 2B     | INJ PWS                 | 3MMU       |
| 02223392 | INTERFERON ALFA 2B     | INJ PWS                 | 5MMU       |
| 02223406 | INTERFERON ALFA 2B     | INJ PWS                 | 10MMU      |
| 02231651 | INTERFERON ALFA 2B     | INJ PWS                 | 18MMU      |
| 00889067 | INTERFERON ALFA 2B     | INJ SOL                 | 10MMU/2ML  |
| 02223414 | INTERFERON ALFA 2B     | INJ SOL                 | 10MMU/2ML  |
| 02238674 | INTERFERON ALFA 2B     | INJ SOL                 | 3MMU/0.5ML |
| 02238675 | INTERFERON ALFA 2B     | INJ SOL                 | 5MMU/0.5ML |
| 09853995 | INTERFERON ALFA 2B     | INJ SOL                 | 10MU/VIAL  |



1  
2  
3  
4  
5  
6  
7  
8  
9  
10  
11  
12  
13  
14  
15  
16  
17  
18  
19  
20  
21  
22  
23  
24  
25  
26  
27  
28  
29  
30  
31  
32  
33  
34  
35  
36  
37  
38  
39  
40  
41  
42  
43  
44  
45  
46  
47  
48  
49  
50  
51  
52  
53  
54  
55  
56  
57  
58  
59  
60

| DIN      | Drug Name             | Route of Administration | Strength     |
|----------|-----------------------|-------------------------|--------------|
| 09854045 | INTERFERON ALFA 2B    | INJ SOL                 | 3MMU/0.5ML   |
| 09854053 | INTERFERON ALFA 2B    | INJ SOL                 | 5MMU/0.5ML   |
| 00705896 | INTERFERON ALFA 2B    | INJ-SC SOL              | 3MMU         |
| 00705918 | INTERFERON ALFA 2B    | INJ-SC SOL              | 5MMU         |
| 00705926 | INTERFERON ALFA 2B    | INJ-SC SOL              | 10MMU        |
| 02240693 | INTERFERON ALFA 2B    | INJ-SC SOL              | 18MMU/1.2ML  |
| 02240694 | INTERFERON ALFA 2B    | INJ-SC SOL              | 30MMU/1.2ML  |
| 02240695 | INTERFERON ALFA 2B    | INJ-SC SOL              | 60MMU/1.2ML  |
| 01911988 | INTERFERON ALFA-2A    | INJ PWS                 | 3000MU/ML    |
| 01911996 | INTERFERON ALFA-2A    | INJ PWS                 | 9000MU/ML    |
| 01912003 | INTERFERON ALFA-2A    | INJ PWS                 | 6000MU/ML    |
| 00812471 | INTERFERON ALFA-2A    | INJ PWS                 | 6000MU/ML    |
| 00812498 | INTERFERON ALFA-2A    | INJ SOL                 | 6000MU/ML    |
| 00812501 | INTERFERON ALFA-2A    | INJ SOL                 | 3000MU/ML    |
| 02217015 | INTERFERON ALFA-2A    | INJ SOL                 | 3000MU/ML    |
| 02217031 | INTERFERON ALFA-2A    | INJ SOL                 | 6000MU/ML    |
| 02217058 | INTERFERON ALFA-2A    | INJ SOL                 | 9000MU/ML    |
| 02217066 | INTERFERON ALFA-2A    | INJ SOL                 | 18000MU/ML   |
| 02019914 | INTERFERON ALFA-2A    | INJ SOL                 | 9000MU/ML    |
| 01959069 | INTERFERON ALPHA-N1   | INJ SOL                 | 10MU         |
| 01959077 | INTERFERON ALPHA-N1   | INJ SOL                 | 3MU          |
| 00709042 | INTERFERON ALPHA-N1   | INJ SOL                 | 3MU          |
| 00709050 | INTERFERON ALPHA-N1   | INJ SOL                 | 10MU         |
| 02169649 | INTERFERON BETA       | INJ-SC PWS              | 0.3MG        |
| 02237317 | INTERFERON BETA 1A    | INJ PWS                 | 11MCG        |
| 02237318 | INTERFERON BETA 1A    | INJ PWS                 | 44MCG        |
| 02237770 | INTERFERON BETA 1A    | INJ-IM PWS              | 30MCG/1.1ML  |
| 02269201 | INTERFERON BETA 1A    | INJ-IM SOL              | 30MCG/0.5ML  |
| 02318253 | INTERFERON BETA 1A    | INJ-SC SOL              | 66MCG/1.5ML  |
| 02318261 | INTERFERON BETA 1A    | INJ-SC SOL              | 132MCG/1.5ML |
| 02237319 | INTERFERON BETA 1A    | INJ-SC SOL              | 22MCG/0.5ML  |
| 02237320 | INTERFERON BETA 1A    | INJ-SC SOL              | 44MCG/0.5ML  |
| 09857395 | INTERFERON BETA-1A    | PREF AUTOINJ PEN        | 30MCG/0.5ML  |
| 02337819 | INTERFERON BETA-1B    | RECOMBINANT             | INJ-SC PWS   |
| 00846368 | RECOMBINANT           | INJ-SC PWS              | 0.3MG        |
| 00846368 | LEVAMISOLE HCL        | TAB                     | 50MG         |
| 02234217 | LEVAMISOLE HCL        | TAB                     | 50MG         |
| 09857505 | PEGINTERFERON ALFA 2A | RECOMBINANT             | INJ-SC SOL   |
| 09857505 | RECOMBINANT           | INJ-SC SOL              | 180MCG/0.5ML |
| 02248077 | PEGINTERFERON ALFA 2A | RECOMBINANT             | INJ-SC SOL   |
| 02248077 | RECOMBINANT           | INJ-SC SOL              | 180MCG/0.5ML |
| 02248078 | PEGINTERFERON ALFA 2A | RECOMBINANT             | INJ-SC SOL   |
| 02248078 | RECOMBINANT           | INJ-SC SOL              | 180MCG/ML    |

| DIN      | Drug Name         | Route of Administration | Strength |
|----------|-------------------|-------------------------|----------|
| 00258482 | BLEOMYCIN SULFATE | INJ PWS                 | 15U      |
| 00163899 | DAUNORUBICIN HCL  | INJ PD                  | 20MG     |
| 01926683 | DAUNORUBICIN HCL  | IV PWS                  | 20MG     |
| 00353078 | DOXORUBICIN HCL   | IV PWS                  | 50MG     |
| 00357391 | DOXORUBICIN HCL   | IV PWS                  | 10MG     |
| 00640050 | EPIRUBICIN HCL    | INJ PWS                 | 10MG     |
| 00640069 | EPIRUBICIN HCL    | IV PWS                  | 50MG     |
| 00381799 | MITOMYCIN         | IV PWS                  | 5MG      |
| 00463221 | MITOTANE          | TAB                     | 500MG    |
| 02415992 | AFLIBERCEPT       | VIAL                    | 40MG/ML  |
| 02273993 | ALEMTUZUMAB       | IV SOL                  | 10MG/ML  |
| 02290960 | ALEMTUZUMAB       | IV SOL                  | 30MG/ML  |
| 02270994 | BEVACIZUMAB       | IV SOL                  | 25MG/ML  |
| 09857407 | RITUXIMAB         | IV SOL                  | 10MG/ML  |
| 02241927 | RITUXIMAB         | IV SOL                  | 10MG/ML  |

408

409

410 **Appendix 4. ICD-9 codes and ICD-10 codes utilized to define acute respiratory illness in physician,**  
 411 **ER and hospital encounters.**

| Description                                                         | ICD-9 Code                  | ICD-10 Code                |
|---------------------------------------------------------------------|-----------------------------|----------------------------|
| Viral infection, unspecified site                                   | 079                         | B34                        |
| Viral agents as the cause of diseases classified to other chapters  | --                          | B97 (but not B973 or B977) |
| Acute nasopharyngitis (common cold)                                 | 460                         | J00                        |
| Acute sinusitis                                                     | 461                         | J01                        |
| Acute pharyngitis                                                   | 462                         | J02                        |
| Acute tonsillitis                                                   | 463                         | J03                        |
| Acute laryngitis, tracheitis, epiglottitis, croup                   | 464                         | J04, J05                   |
| Acute upper respiratory infections of multiple or unspecified sites | 465                         | J06                        |
| Influenza due to identified novel influenza A virus                 | 488                         | J09                        |
| Influenza                                                           | 487                         | J10, J11                   |
| Pneumonia, organism unspecified                                     | 486                         | --                         |
| Viral pneumonia                                                     | 480                         | J12                        |
| Bacterial pneumonia                                                 | 481, 482                    | J13, J14, J15              |
| Pneumonia due to other specified organism                           | 483                         | J16                        |
| Pneumonia in infectious diseases classified elsewhere               | 484                         | J17                        |
| Bronchopneumonia, organism unspecified                              | 485                         | J18                        |
| Acute bronchitis and bronchiolitis                                  | 466                         | J20, J21                   |
| Unspecified diseases respiratory system                             | 519                         | J22, J39.8, J39.9          |
| Bronchitis, not specified as acute or chronic                       | 490                         | J40                        |
| Acute respiratory distress syndrome                                 | 518.82                      | J80                        |
| Pulmonary edema                                                     | 518.4                       | J81                        |
| Pleural effusion                                                    | 510.9, 511.0, 511.1, 511.89 | J86.9, J90, R09.1          |
| Respiratory failure                                                 | 518.81                      | J96.0, J96.9               |
| Atelectasis                                                         | --                          | J98.10                     |
| Pulmonary collapse                                                  | 518.0                       | J98.19                     |
| Other respiratory disorders                                         | 786.00, 786.09              | J98.0, J98.4, J98.8, J98.9 |
| Hemoptysis                                                          | 786.30                      | R04.2                      |
| Cough                                                               | 786.2                       | R05                        |
| Shortness of breath (dyspnea)                                       | 786.02, 786.05, 786.09      | R06.0                      |
| Stridor                                                             | 786.1                       | R06.1                      |
| Wheezing                                                            | 786.07                      | R06.2                      |
| Tachypnea                                                           | 786.06                      | R06.4                      |
| Chest pain on breathing                                             | 786.52                      | R07.1                      |
| Hypoxemia                                                           | 799.02                      | R09.0                      |
| Respiratory arrest                                                  | 799.1                       | R09.2                      |
| Abnormal sputum                                                     | 786.4                       | R09.3                      |
| Nasal congestion                                                    | 478.19                      | R09.81                     |
| Abnormal chest sounds                                               | 786.7                       | R09.89                     |

|  | <b>Description</b>     | <b>ICD-9 Code</b>                                            | <b>ICD-10 Code</b> |
|--|------------------------|--------------------------------------------------------------|--------------------|
|  | Fever                  | 780.60                                                       | R50                |
|  | Chills (without fever) | 780.64                                                       | R68.0              |
|  | Sepsis, shock          | 669.11, 669.12, 669.14,<br>785.50, 785.52, 995.91,<br>995.92 | A41.9, R57.9       |

412

413

For peer review only

# BMJ Open

## Using population-wide administrative and laboratory data to estimate type- and subtype-specific influenza vaccine effectiveness: a surveillance protocol

|                                 |                                                                                                                                                                                                                                                                                                                                                                                                                                                                                                                                                                                                                     |
|---------------------------------|---------------------------------------------------------------------------------------------------------------------------------------------------------------------------------------------------------------------------------------------------------------------------------------------------------------------------------------------------------------------------------------------------------------------------------------------------------------------------------------------------------------------------------------------------------------------------------------------------------------------|
| Journal:                        | <i>BMJ Open</i>                                                                                                                                                                                                                                                                                                                                                                                                                                                                                                                                                                                                     |
| Manuscript ID                   | bmjopen-2019-029708.R1                                                                                                                                                                                                                                                                                                                                                                                                                                                                                                                                                                                              |
| Article Type:                   | Protocol                                                                                                                                                                                                                                                                                                                                                                                                                                                                                                                                                                                                            |
| Date Submitted by the Author:   | 26-Apr-2019                                                                                                                                                                                                                                                                                                                                                                                                                                                                                                                                                                                                         |
| Complete List of Authors:       | Scott, Allison; Government of Alberta, Ministry of Health; PolicyWise for Children & Families<br>Buchan, Sarah; Institute for Clinical Evaluative Sciences; Public Health Ontario<br>Kwong, Jeff; Institute for Clinical Evaluative Sciences<br>Drews, Steven; Alberta Provincial Laboratory for Public Health; University of Alberta, Division of Preventive Medicine<br>Simmonds, Kimberley; Alberta Ministry of Health, Epidemiology and Surveillance<br>Svenson, Lawrence; Government of Alberta, Ministry of Health; University of Calgary Cumming School of Medicine, Department of Community Health Sciences |
| <b>Primary Subject Heading</b>: | Public health                                                                                                                                                                                                                                                                                                                                                                                                                                                                                                                                                                                                       |
| Secondary Subject Heading:      | Infectious diseases, Public health, Epidemiology                                                                                                                                                                                                                                                                                                                                                                                                                                                                                                                                                                    |
| Keywords:                       | Influenza, Vaccine effectiveness, Case Control, Test-negative, Administrative data, Population level                                                                                                                                                                                                                                                                                                                                                                                                                                                                                                                |
|                                 |                                                                                                                                                                                                                                                                                                                                                                                                                                                                                                                                                                                                                     |

SCHOLARONE™  
Manuscripts

1  
2  
3 1 **TITLE**

4  
5 2 **Using population-wide administrative and laboratory data to estimate type- and subtype-specific**  
6 3 **influenza vaccine effectiveness: a surveillance protocol**

7  
8 4 Allison N Scott<sup>1,2,3</sup>

9  
10 5 Sarah A Buchan<sup>4,5,6</sup>

11  
12 6 Jeffrey C Kwong<sup>4,5,6,7,8</sup>

13  
14 7 Steven J Drews<sup>9,10</sup>

15  
16 8 Kimberley A Simmonds<sup>1,11</sup>

17  
18 9 Lawrence W Svenson<sup>1,11, 12, 13</sup>

19  
20  
21 10

22 11 **Affiliations**

23  
24 12 <sup>1</sup>Ministry of Health, Government of Alberta, Edmonton, AB, Canada

25  
26 13 <sup>2</sup>PolicyWise for Children & Families, Edmonton, AB, Canada

27  
28 14 <sup>3</sup>Department of Public Health, Concordia University of Edmonton, AB, Canada

29  
30 15 <sup>4</sup>ICES, Toronto, ON, Canada

31  
32 16 <sup>5</sup>Public Health Ontario, Toronto, ON, Canada

33  
34 17 <sup>6</sup>Dalla Lana School of Public Health, University of Toronto, Toronto, ON, Canada

35  
36 18 <sup>7</sup>Department of Family & Community Medicine, University of Toronto, Toronto, ON, Canada

37  
38 19 <sup>8</sup>University Health Network, Toronto, ON, Canada

39  
40 20 <sup>9</sup>The Alberta Provincial Laboratory for Public Health, Edmonton, AB, Canada

41  
42 21 <sup>10</sup>Department of Laboratory Medicine & Pathology, University of Alberta, Edmonton, AB, Canada

43  
44 22 <sup>11</sup> Department of Community Health Sciences, Cumming School of Medicine, University of Calgary, Calgary,  
45 23 AB, Canada

46  
47 24 <sup>12</sup> School of Public Health, University of Alberta, Edmonton, AB, Canada

48  
49 25 <sup>13</sup> Division of Preventive Medicine, University of Alberta, Edmonton, AB, Canada

50  
51  
52 26

53  
54 27 **Corresponding Author:**

55  
56 28 Allison N. Scott, Ph.D.

1  
2  
3 29 PolicyWise for Children & Families  
4  
5 30 1000, 9925-109 Street NW  
6  
7 31 Edmonton, Alberta, Canada T5K 2J8  
8

9 32

10  
11 33 **Email Addresses**

12  
13 34 Allison N Scott AScott@policywise.com  
14  
15 35 Sarah A Buchan Sarah.Buchan@oahpp.ca  
16  
17 36 Jeffrey C Kwong jeff.kwong@utoronto.ca  
18  
19 37 Steven J Drews steven.drews@blood.ca  
20  
21 38 Kimberley A Simmonds kimberley.simmonds@gov.ab.ca  
22  
23 39 Lawrence W Svenson larry.svenson@gov.ab.ca  
24

25 40

26  
27 41

28  
29 42 **Word Count:** 2,502  
30  
31  
32  
33  
34  
35  
36  
37  
38  
39  
40  
41  
42  
43  
44  
45  
46  
47  
48  
49  
50  
51  
52  
53  
54  
55  
56  
57  
58  
59  
60

1  
2  
3 **43 ABSTRACT**

4  
5 **44 Introduction**

6  
7 45 The appropriateness of using routinely collected laboratory data combined with administrative data for  
8  
9 46 estimating influenza vaccine effectiveness (VE) is still being explored. This paper outlines a protocol to  
10  
11 47 estimate influenza VE using linked laboratory and administrative data which could act as a companion to  
12  
13 48 estimates derived from other methods.

14  
15  
16 **49 Methods and Analysis**

17  
18 50 We will use the test-negative design to estimate VE for each influenza type/subtype and season. Province-  
19  
20 51 wide individual-level records of positive and negative influenza tests at the Provincial Laboratory for Public  
21  
22 52 Health in Alberta will be linked, by unique personal health numbers, to administrative databases and  
23  
24 53 vaccination records held at the Ministry of Health in Alberta to determine covariates and influenza  
25  
26 54 vaccination status, respectively. Covariates of interests include age, sex, immunocompromising chronic  
27  
28 55 conditions, and healthcare setting. Cases will be defined based on an individual's first positive influenza test  
29  
30 56 during the season, and potential controls will be defined based on an individual's first negative influenza test  
31  
32 57 during the season. One control for each case will be randomly selected based on the week the specimen was  
33  
34 58 collected. We will estimate vaccine effectiveness using multivariable logistic regression.

35  
36  
37 **59 Ethics and Dissemination**

38  
39 60 Ethics approval was obtained from the University of Alberta's Health Research Ethics Board – Health Panel  
40  
41 61 under study ID Pro00075997. Results will be disseminated by public health officials in Alberta.

42  
43  
44 62

45  
46  
47 63

48  
49  
50 64



1  
2  
3 65 **Key Words**  
4

5 66 Influenza  
6

7 67 Vaccine effectiveness  
8

9 68 Case Control  
10

11 69 Test-negative  
12

13 70 Administrative data  
14

15 71 Population-level  
16

17 72 Laboratory data  
18

19 73 Vaccination database  
20

21 74  
22  
23  
24  
25  
26  
27  
28  
29  
30  
31  
32  
33  
34  
35  
36  
37  
38  
39  
40  
41  
42  
43  
44  
45  
46  
47  
48  
49  
50  
51  
52  
53  
54  
55  
56  
57  
58  
59  
60

For peer review only

1  
2  
3 75 **ARTICLE SUMMARY**  
4

5 76 **Strengths and limitations of this study**  
6

- 7 77 • A strength of this protocol is that it provides near real time estimation of vaccine effectiveness to  
8 78 assist public health in allocating resources and determining the appropriate policies and public  
9 79 messaging during the influenza season.  
10 79  
11 80 • Vaccine effectiveness estimates use a test negative design, taking advantage of linked administrative  
12 81 health records for the entire population.  
13 82  
14 82 • While many confounders are included in the vaccine effectiveness estimates, not all known  
15 83 confounders can be measured using administrative health data.  
16  
17 84

## 85 INTRODUCTION

86 Influenza is a respiratory viral disease associated with significant morbidity and mortality globally. Infections  
87 range from relatively mild presentations (e.g. cough, sore throat) to severe lower respiratory tract infections  
88 (e.g. pneumonia). Severe cases may be associated with hospitalization, intensive care admission, and death;  
89 young children, the elderly, and individuals with chronic conditions are at highest risk of severe outcomes[1].  
90 In Canada, rates of laboratory-confirmed influenza infections are, on average, approximately 200 cases per  
91 100,000 population, with approximately 50% of cases occurring in patients aged  $\leq 18$  years [2]. The causative  
92 agents, influenza A (subtypes H3N2 and H1N1pdm(09)) and influenza B (Yamagata and Victoria lineages),  
93 are under strong selective pressure to mutate genetically; significant genetic changes can occur in relatively  
94 short periods of time (i.e.  $< 1$  year) [3].

95 Influenza prevention relies, in part, on annual vaccination campaigns. Selection of viral strains for inclusion  
96 in the vaccine occurs approximately 9 months prior to the onset of the influenza season; by the time the  
97 vaccines are administered, the predominant circulating strains may have mutated to the point such that the  
98 effectiveness of the vaccine has diminished or has become completely ineffective [4,5].

99 Influenza VE is commonly estimated using the test-negative design, a variation of the case-control design  
100 where cases and controls are selected from a pool of individuals who have been tested for influenza [6–10].  
101 Several research groups use sentinel physician networks to recruit patients: influenza testing is performed on  
102 patients who meet a case definition for influenza-like illness, and cases and controls are selected from that  
103 pool [6–8]. While this has become an established method, there are some limitations to using sentinel  
104 physicians. As the physicians are often volunteers, there can be bias in the geographic distribution, leading to  
105 clustering of sampling in certain areas and not others. This can lead to inaccuracies as predominant  
106 circulating influenza strains vary geographically [7,11]. Immunization information is commonly self-reported,  
107 potentially leading to recall and social desirability biases [12]; volunteer physicians may be more likely to have  
108 strong views on influenza immunization, potentially making it more difficult for the patient to admit to not  
109 being immunized. Finally, as these studies are labour-intensive for clinic staff, physician recruitment is often

1  
2  
3 110 low, resulting in small sample sizes and wide confidence intervals. Estimates are, therefore, typically available  
4  
5 111 after the peak of the influenza season, decreasing their usefulness for public health messaging and resource  
6  
7 112 and operational planning [6–8,11].  
8  
9

10 113 Using administrative data and routinely collected clinical specimens for estimating VE is currently under  
11  
12 114 debate [13]. VE estimates generated using linked health administrative and laboratory data in the province  
13  
14 115 Ontario have been shown to be comparable to previously published estimates [manuscript under review].  
15  
16 116 There has been one published estimate of Alberta-specific vaccine effectiveness using a sentinel surveillance  
17  
18 117 system[11]; however, because of the small sample size the confidence interval was large, ranging from 8% to  
19  
20 118 72%. Estimating VE in a large jurisdiction with near-real-time data on all influenza laboratory testing and  
21  
22 119 influenza vaccination in the population has the potential to provide more precise and timely VE estimates  
23  
24 120 than has previously been possible. We present a protocol to estimate influenza VE using individually-linked  
25  
26 121 laboratory and administrative data.  
27  
28

29 122

## 30 31 32 123 **METHODS AND ANALYSIS**

### 33 34 35 124 **Study Setting:**

36  
37  
38 125 Alberta is a province in Canada with a publicly-funded universal health care system; each of the 4.25 million  
39  
40 126 residents is assigned a unique personal health number (PHN) at birth or upon immigration to the province  
41  
42 127 [14]. The PHN is recorded each time a person accesses the healthcare system, allowing for deterministic  
43  
44 128 linkage across multiple administrative data sets held by the Ministry of Health.

45  
46  
47 129 In 2009, influenza vaccination became universally available to all Albertans aged  $\geq 6$  months, regardless of  
48  
49 130 comorbidities or other risk conditions [15]. Influenza vaccines are available at no cost to the patient at public  
50  
51 131 health clinics, pharmacies, physician offices, long-term care facilities, university health centers, and  
52  
53 132 workplaces. Annual vaccine campaigns begin in October, with approximately 60% of all influenza  
54  
55 133 vaccinations given by the end of the second week of the campaign. While the peak of influenza activity has  
56  
57

1  
2  
3 134 varied widely since 2010, the median influenza peak in Alberta is in mid-January, approximately three months  
4  
5 135 after vaccination campaigns begin.  
6  
7

8 136

### 11 137 **Laboratory methods for influenza A and B detection and influenza A subtyping**

12  
13 138 All influenza testing in Alberta is performed at a single diagnostic lab, the Provincial Laboratory for Public  
14  
15 139 Health (ProvLab) and stored in a single laboratory information system, along with test and patient identifiers.  
16  
17 140 Clinical specimens (e.g. nasopharyngeal swabs, nasopharyngeal aspirates, bronchoalveolar lavages) are  
18  
19 141 processed at ProvLab using previously published protocols. Nucleic acid extraction utilizes the easyMAG  
20  
21 142 extractor and reagents (bioMerieux, St. Laurent, Quebec, Canada)[16]. Nucleic acid from clinical specimens are  
22  
23 143 then tested using a series of respiratory detection assays as described below. Prior to May 2017, a real-time  
24  
25 144 influenza A/B reverse-transcriptase PCR (RT-PCR) was used to diagnose influenza using a protocol  
26  
27 145 previously described [17,18]. After May 2017, ProvLab has been using a Luminex Respiratory Pathogen Panel  
28  
29 146 for the identification of influenza A (including subtype), influenza B, and other respiratory viruses (e.g.  
30  
31 147 coronavirus and parainfluenza) [14]. Results of the laboratory testing were imported into specific laboratory  
32  
33 148 information systems depending on the testing time period.  
34  
35

36 149

### 38 150 **Study Design:**

39  
40  
41 151 We will use the test-negative design to estimate VE. We will estimate VE for the 2011/12 – 2018/19  
42  
43 152 influenza seasons. The results of all respiratory virus tests conducted at ProvLab will be sent to the Ministry  
44  
45 153 of Health for deterministic linkage to health administrative databases, in order to determine eligibility for  
46  
47 154 inclusion in the analysis, influenza vaccination status, and the following covariates: age, sex, socio-economic  
48  
49 155 status, geographic zone of residence, history of immunocompromising comorbidities, healthcare setting  
50  
51 156 (inpatient or outpatient setting), and month at the time of specimen submission. The presence of a diagnostic  
52  
53 157 code for an acute respiratory illness (ARI) at the time of specimen collection will be used in a sensitivity  
54  
55 158 analysis.  
56  
57  
58  
59  
60

1  
2  
3 159 Isolates will be considered eligible for inclusion in the analysis if they met all of the following criteria: a valid  
4  
5 160 PHN is recorded, the isolate is not from a resident of a long-term care facility, the isolate was collected at  
6  
7 161 least four weeks after the initiation of the public influenza vaccination program, and the isolate was collected  
8  
9 162 during the influenza season, as determined using the method recommended by the WHO [19–21].

11  
12 163 It is important to ensure that the population has the chance to be exposed to influenza and there is sufficient  
13  
14 164 time for immunity to the vaccine to be developed. Residence in a long-term care facility will be determined  
15  
16 165 via the Alberta Continuing Care Information System (ACCIS), which contains information on admissions  
17  
18 166 and discharges from long-term care facilities [22]. PHN validity will be assessed using the Alberta Health  
19  
20 167 Care Insurance Plan (AHCIP) Adjusted Population Registry, which contains records of all individuals  
21  
22 168 registered for healthcare insurance [22,23].

23  
24  
25 169 Individuals can have multiple laboratory tests over the course of their illness; therefore only the first positive  
26  
27 170 influenza test during the influenza season will be used, and potential control samples will be selected from  
28  
29 171 among those who only tested negative for influenza during that influenza season, using the first negative test.  
30  
31 172 Cases and controls tested <14 days after vaccination will be excluded from the analysis.

32  
33  
34 173 Influenza vaccination status will be determined from the Influenza Vaccination Registry. The registry  
35  
36 174 combines data from four databases that record influenza vaccination events (see below).

37  
38  
39 175 The following administrative data sets will be used in this study.

- 40  
41  
42 176
- 43 • Alberta Health Immunization and Adverse Reaction to Immunization system (Imm/ARI) contains  
44 records of all publicly funded vaccines administered through public health, including influenza  
45 177 vaccines administered at mass influenza vaccination clinics, public health clinics, and vaccinations  
46 178 administered by public health nurses in long-term care facilities. Data submission is mandatory and  
47 179 administered by public health nurses in long-term care facilities. Data submission is mandatory and  
48 179 guidelines exist to support complete and accurate vaccination records with descriptions of each,  
49 180 including notes [24,25].  
50  
51  
52  
53 181
- 54  
55  
56  
57  
58  
59  
60

- 1  
2  
3 182 • The Supplemental Enhanced Service Event (SESE) database captures physician claims for billing  
4  
5 183 purposes; International Classification of Diseases, Ninth Revision (ICD-9) diagnosis codes,  
6  
7 184 procedure codes (Canadian Classification of Procedures), codes indicating location of service  
8  
9 185 delivery, and a number of other administrative elements used to support the payment for each  
10  
11 186 patient encounter [23,26,27].
- 13  
14 187 • Alberta Blue Cross (ABC) administers the pharmacist component of the universal vaccination  
15  
16 188 program. Pharmacists administering influenza vaccines through this program submit claims to ABC  
17  
18 189 for each vaccine provided; they are required to submit patient information such as PHN, date of  
19  
20 190 service, name, and address.
- 21  
22 191 • The Pharmaceutical Information Network (PIN) database records dispensed pharmacological  
23  
24 192 products, regardless of payer, including the rare instances when an influenza vaccine is purchased  
25  
26 193 rather than administered through the public program (e.g. purchased by travelers prior to the launch  
27  
28 194 of the public campaign). PIN captures approximately 95% of all dispensed events in the province  
29  
30 195 [22].
- 31  
32 196 • Provincial Vaccine Registry combines influenza vaccinations given in the province and recorded in  
33  
34 197 four source databases (PIN, ABC, SESE and Imm/ARI).
- 35  
36 198 • Alberta Health Care Insurance Plan (AHCIP) Population Registry contains demographic variables,  
37  
38 199 age, sex, socio-economic status, and geographic zone of residence. Neighbourhood-level socio-  
39  
40 200 economic status is derived from census dissemination area income quintiles using postal code.
- 41  
42 201 • Morbidity and Ambulatory Care Abstracting Reporting (MACAR) system contains ICD-10-CA  
43  
44 202 diagnostic codes, procedure codes, the date of admission, and date of discharge for every visit to  
45  
46 203 hospitals, emergency rooms, and outpatient clinics.

47  
48  
49  
50 204 The quality of administrative datasets in Alberta has been extensively reviewed [28–30].

51  
52  
53 205 Individuals will be considered inpatients if they have at least one physician claim for inpatient services on  
54  
55 206 the same day as specimen collection or if specimen collection occurred during an inpatient stay; all others

207 will be considered outpatients. Individuals with an immunocompromising condition will be defined as  
208 those who have a diagnosis of HIV, who received an organ transplant, or received oral corticosteroids  
209 (for  $\geq 30$  days), antineoplastic agents, or another immunocompromising drug from a community  
210 pharmacist in the past 6 months. (Appendix 1 and 2) [31]. HIV diagnosis and ARI will be determined  
211 through physician claims and MACAR. Organ transplantation will be determined using MACAR, and  
212 immunocompromising drug dispensations will be identified through PIN.

### 213 **Statistical Analysis**

214 We will use multivariable logistic regression to estimate influenza vaccine effectiveness as  $(1 - \text{adjusted OR}) \times$   
215 100%. We will estimate VE separately by influenza season and influenza subtype (i.e., A(H3N2),  
216 A(H1N1)pdm09, and influenza B) [32]. When there is a large enough sample size in a particular season to  
217 provide adequate power, VE will be estimated for specific age groups such as children under the age of 5 and  
218 seniors over the age of 65. The following covariates will be included in the adjusted model, regardless of  
219 statistical significance: age, sex, socio-economic status, geographic zone of residence, history of  
220 immunocompromising comorbidities, healthcare setting (inpatient or outpatient setting), and month of  
221 specimen submission within the influenza season. SAS version 9.4 will be used for all statistical analysis (SAS  
222 Institute Inc, Cary, NC). VE estimates will be compared to published estimates of VE [6,7,11,13,33,34].  
223 As shedding of influenza virus continues for approximately 4-5 days after symptom onset, bias can result if  
224 specimens that are collected too long after symptom onset are used [35]. Most studies use a threshold of 7  
225 days [36]. To test the robustness of the findings, a sensitivity analysis will be performed; controls will be  
226 restricted to those specimens positive for a different respiratory virus (i.e. coronavirus, human respiratory  
227 syncytial virus) (As suggested by Sullivan et al 2016).

228 A potential limitation to this study is that the samples utilized here are clinical isolates taken through the  
229 course of normal patient care, and are not from a standard case definition as is utilized in some other studies  
230 [12]. To test the robustness of the findings, the analysis will be repeated using only cases and controls that



231 were given a diagnosis code for ARI on the same day as specimen collection, as per the SESE database or  
232 MACAR. Appendix 3 lists the ICD-9 and ICD-10 codes used to define ARIs.

233

## 234 **PATIENT AND PUBLIC INVOLVEMENT**

235 Patients and the public were not involved in the design of the study, including the development of the  
236 research question, outcomes measures, recruitment to or conduct of the study. The results of the study will  
237 be disseminated to the public as deemed appropriate by public health officials.

238

## 239 **DISCUSSION**

240 This protocol describes the estimation of seasonal influenza VE using specimens collected for routine  
241 influenza diagnostics as well as administrative data and vaccination records.

242 A key strength of this approach is the large sample size. This approach allows calculation of near real-time,  
243 precise influenza VE estimates weeks prior to the influenza season peak, creating an early warning system for  
244 public health if, as in the 2014-2015 season, the vaccine is found to have exceedingly low effectiveness. Early  
245 notification of VE can assist public health in determining policies, messaging, and allocation of resources  
246 (antiviral agents, staffing emergency departments) to counter a potentially more severe influenza season  
247 [36,37]. The large sample size also allows for stratified analyses of VE based on product, age group, or region.

248 Whereas sentinel physician networks rely primarily on self-reported measures of influenza vaccination [33], a  
249 significant strength of this study is the use of the near-real-time influenza vaccination registry that contains  
250 individual-level, linkable data for most influenza vaccinations administered in the province. Use of this  
251 registry reduces the likelihood of recall error and information biases such as social desirability bias and  
252 reduces non-differential misclassification, which would bias the odds ratio towards the null, thus  
253 underestimating VE [12].

1  
2  
3 254 Finally, we are certain to capture the results of all respiratory virus testing in the province, as all respiratory  
4  
5 255 virus testing is centralized at ProvLab and there is limited use of point-of-care testing.  
6  
7

8 256 There are some limitations to this methodology compared to the traditional method of VE estimation using  
9  
10 257 sentinel physician networks, because a standardized clinical case definition cannot be applied to determine  
11  
12 258 study eligibility. A sensitivity analysis restricting to healthcare encounters with a diagnosis code for ARI will  
13  
14 259 be used as a proxy for a standard case definition.  
15  
16

17 260 While the inclusion of confounders is important for VE estimate adjustment, not all known confounders can  
18  
19 261 be measured using administrative data. Frailty has been demonstrated to be a potential confounder of VE  
20  
21 262 [38–40]. Frailty cannot be included in the multivariable model because no validated indices of frailty  
22  
23 263 generated from standard administrative data exist at this time. However, this may not affect the results  
24  
25 264 significantly as a previous study indicated that inclusion of frailty in the multivariate model increased VE  
26  
27 265 estimates only slightly [41].  
28  
29

30 266 Laboratory requisitions in Alberta do not contain illness onset date. Ideally this would be used to ensure that  
31  
32 267 the negative laboratory test results were representative of an acute infectious period and that test-negative  
33  
34 268 specimens were not collected after viral shedding had ceased. Sullivan et al 2016 have indicated this bias may  
35  
36 269 be accounted for by selecting influenza test-negative controls that were positive for another respiratory virus.  
37  
38 270 Requiring controls to be positive for another virus excludes individuals who are tested long after their acute  
39  
40 271 infectious period. However, a recent systematic review found no differences when using different groups of  
41  
42 272 controls [42].  
43  
44

45 273 Comparison of the VE results using administrative data to previously published studies, specifically sentinel  
46  
47 274 surveillance for the same seasons (2011/12 – 2018/19) will help to identify further areas of refinement.  
48  
49 275 This approach could successfully allow for the generation of early influenza VE estimates which could  
50  
51 276 facilitate tailoring of public health messaging and assist in public health operations planning for the peak of  
52  
53 277 the influenza season.  
54  
55

56 278  
57  
58  
59  
60

1  
2  
3 **279 ETHICS**  
4

5 **280** Ethics approval was obtained from the University of Alberta's Health Research Ethics Board – Health Panel  
6  
7 **281** under study ID Pro00075997.  
8

9 **282**

10  
11 **283 LIST OF ABBREVIATIONS**  
12

13 **284** ABC – Alberta Blue Cross

14  
15 **285** ACCIS – Alberta Continuing Care Information System

16  
17 **286** AHCIP – Alberta Health Care Insurance Plan Adjusted Population Registry

18  
19 **287** CCI – Canadian Classification of Health Interventions

20  
21 **288** CCP – Canadian Classification of Diagnostic, Therapeutic, and Surgical Procedures

22  
23 **289** ICD-9 – International Classification of Diseases, Ninth Revision

24  
25 **290** ICD-10 – International Classification of Diseases, Tenth Revision

26  
27 **291** Imm/ARI – Alberta Health Immunization and Adverse Reaction to Immunization system

28  
29 **292** MACAR – Morbidity and Ambulatory Care Abstracting Reporting

30  
31 **293** PHN – Personal Health Number

32  
33 **294** PIN – Pharmaceutical Information Network

34  
35 **295** ProvLab – Alberta Provincial Laboratory for Public Health

36  
37 **296** RT-PCR – Reverse Transcriptase Polymerase Chain Reaction

38  
39 **297** SESE – Supplemental Enhance Service Event

40  
41 **298** VE – Vaccine Effectiveness

42  
43 **299**

44  
45  
46 **300 ETHICS APPROVAL AND CONSENT TO PARTICIPATE**  
47

48 **301** Ethics approval was obtained from the University of Alberta's Health Research Ethics Board – Health Panel  
49  
50 **302** under study ID Pro00075997.  
51

52  
53 **303**

54  
55 **304 CONSENT FOR PUBLICATION**  
56  
57  
58  
59  
60

1  
2  
3 305 Not applicable  
4  
5

6 306  
7

8  
9 307 **AVAILABILITY OF DATA AND MATERIALS**

10  
11 308 Not applicable  
12

13  
14 309

15  
16 310 **COMPETING INTERESTS**

17  
18 311 The authors declare that they have no competing interests.  
19

20  
21 312

22  
23 313 **FUNDING**

24  
25 314 Not applicable  
26

27 315  
28

29 316 **AUTHOR STATEMENT**

30  
31 317 ANS and SJD conceived of and designed the protocol and drafted and revised the manuscript. KS and LS  
32 318 planned the original approach, providing guidance on available administrative database resources. SAB and  
33 319 JCK made substantial contributions to the design and critically revised the manuscript.  
34

35  
36 320  
37

38 321

39  
40 322 **ACKNOWLEDGEMENTS**

41  
42 323 The authors would like to acknowledge the staff at Alberta Health Services and ProvLab for their assistance  
43 324 in providing administrative and laboratory data sources that could be implemented in this protocol.  
44

45 325  
46  
47  
48  
49  
50  
51  
52  
53  
54  
55  
56  
57  
58  
59  
60

## 326 REFERENCES

- 327 1 Mertz D, Tae HK, Johnstone J, *et al*. Populations at risk for severe or complicated influenza illness:  
328 systematic review and meta-analysis. *BMJ* 2013;**347**:10.
- 329 2 Alberta Health Services. Alberta Health Services. 2017.
- 330 3 Wong S-S, Webby RJ. Traditional and new influenza vaccines. *Clin Microbiol Rev* 2013;**26**:476–92.  
331 doi:10.1128/CMR.00097-12
- 332 4 Skowronski DM, Chambers C, Sabaiduc S, *et al*. A Perfect Storm: Impact of Genomic Variation and  
333 Serial Vaccination on Low Influenza Vaccine Effectiveness During the 2014-2015 Season. *Clin Infect*  
334 *Dis An Off Publ Infect Dis Soc Am* 2016;**63**:21–32. doi:10.1093/cid/ciw176
- 335 5 World Health Organization. Influenza Update N ° 309. 2018;**2018**:1–8.
- 336 6 Skowronski DM, De Serres G, Crowcroft NS, *et al*. Association between the 2008-09 seasonal  
337 influenza vaccine and pandemic H1N1 illness during Spring-Summer 2009: four observational studies  
338 from Canada. *PLoS Med* 2010;**e1000258**. doi:10.1371/journal.pmed.1000258
- 339 7 Chambers C, Skowronski DM, Sabaiduc S, *et al*. Interim estimates of 2015/16 vaccine effectiveness  
340 against influenza A(H1N1)pdm09, Canada, February 2016. *Euro Surveill Bull Eur Sur Les Mal Transm =*  
341 *Eur Commun Dis Bull* 2016;**21**:30168. doi:10.2807/1560-7917.ES.2016.21.11.30168
- 342 8 Kwong JC, Campitelli MA, Gubbay JB, *et al*. Vaccine effectiveness against laboratory-confirmed  
343 influenza hospitalizations among elderly adults during the 2010-2011 season. *Clin Infect Dis An Off Publ*  
344 *Infect Dis Soc Am* 2013;**57**:820–7. doi:10.1093/cid/cit404
- 345 9 Orenstein WA, Bernier RH, Dondero TJ, *et al*. Field evaluation of vaccine efficacy. *Bull World Health*  
346 *Organ* 1985;**63**:1055–68.
- 347 10 Public Health Agency of Canada. Effectiveness of Vaccine Against Medical Consultation Due to  
348 Laboratory-Confirmed Influenza: Results From a Sentinel Physician Pilot Project in British Columbia,  
349 2004-2005. *Can Commun Dis Rep* 2005;**31**:181–91.
- 350 11 Skowronski DM, Chambers C, Sabaiduc S, *et al*. Interim estimates of 2016/17 vaccine effectiveness  
351 against influenza A(H3N2), Canada, January 2017. *Euro Surveill Bull Eur Sur Les Mal Transm = Eur*  
352 *Commun Dis Bull* 2017;**22**. doi:10.2807/1560-7917.ES.2017.22.6.30460
- 353 12 World Health Organization (WHO). Evaluation of influenza vaccine effectiveness: A guide to the  
354 design and interpretation of observational studies. 2017;**1**:1–47.
- 355 13 Belongia EA, Simpson MD, King JP, *et al*. Variable influenza vaccine effectiveness by subtype: a  
356 systematic review and meta-analysis of test-negative design studies. *Lancet Infectious Dis* 2016;**16**:942–51.  
357 doi:10.1016/S1473-3099(16)00129-8
- 358 14 Fathima S, Simmonds K, Invik J, *et al*. Use of laboratory and administrative data to understand the  
359 potential impact of human parainfluenza virus 4 on cases of bronchiolitis, croup, and pneumonia in  
360 Alberta, Canada. *BMC Infect Dis* 2016;**16**. doi:10.1186/s12879-016-1748-z
- 361 15 Government of Alberta. Alberta Health: History of immunization in Alberta. 2017.
- 362 16 Pabbaraju K, Tokaryk KL, Wong S, *et al*. Comparison of the luminex xTAG respiratory viral panel  
363 with in-house nucleic acid amplification tests for diagnosis of respiratory virus infections. *J Clin*  
364 *Microbiol* 2008;**46**:3056–62. doi:10.1128/JCM.00878-08

- 1  
2  
3 365 17 Pabbaraju K, Wong S, Wong AA, *et al.* Design and validation of real-time reverse transcription-PCR  
4 366 assays for detection of pandemic (H1N1) 2009 virus. *J Clin Microbiol* 2009;**47**:3454–60.  
5 367 doi:10.1128/JCM.01103-09  
6  
7 368 18 Chaudhry A, Bastien N, Li Y, *et al.* Oseltamivir resistance in an influenza A (H3N2) virus isolated  
8 369 from an immunocompromised patient during the 2014–2015 influenza season in Alberta, Canada.  
9 370 *Influenza Other Respi Viruses* 2016;**10**:532–5. doi:10.1111/irv.12415  
10  
11 371 19 World Health Organization. Global epidemiological surveillance standards for influenza. 2013.  
12  
13 372 20 World Health Organization. A Manual for Estimating Disease Burden Associated with Seasonal  
14 373 Influenza. 2015.  
15  
16 374 21 Alberta Health. Alberta Health Seasonal Influenza in Alberta 2016/2017 Summary Report. 2017.  
17  
18 375 22 Government of Alberta. Overview of Administrative Health Datasets. 2017.  
19  
20 376 23 Russell ML, Schopflocher DP, Svenson L, *et al.* Secular trends in the epidemiology of shingles in  
21 377 Alberta. *Epidemiol Infect* 2007;**135**:908–13.  
22  
23 378 24 Government of Alberta. Immunization data submission and response guidelines. 2017.  
24  
25 379 25 MacDonald SE, Dover DC, Simmonds KA, *et al.* Risk of febrile seizures after first dose of measles-  
26 380 mumps-rubella- varicella vaccine: A population-based cohort study. *CMAJ* 2014;**186**:824–9.  
27 381 doi:10.1503/cmaj.140078  
28  
29 382 26 Alberta Health. Alberta Health Claims Assessment.  
30 383 2017.<https://open.alberta.ca/publications/alberta-health-diagnostic-codes> (accessed 23 Feb 2018).  
31  
32 384 27 Lix LM, Walker R, Quan H, *et al.* Features of physician services databases in Canada. *Chronic Dis Inj*  
33 385 *Can* 2012;**32**:186–93.  
34  
35 386 28 Hinds A, Lix LM, Smith M, *et al.* Quality of administrative health databases in Canada: a scoping  
36 387 review. *Can J Public Heal* 2016;**107**:e56–e61.  
37  
38 388 29 Shiff NJ, Jama S, Boden C, *et al.* Validation of administrative health data for the pediatric population:  
39 389 A scoping review. *BMC Health Serv Res* 2014;**14**. doi:10.1186/1472-6963-14-236  
40  
41 390 30 Quan H, Smith M, Bartlett-Esquilant G, *et al.* Mining Administrative Health Databases to Advance  
42 391 Medical Science: Geographical Considerations and Untapped Potential in Canada. *Can J Cardiol*  
43 392 2012;**28**:152–4. doi:10.1016/j.cjca.2012.01.005  
44  
45 393 31 Schwartz KL, Jembere N, Campitelli MA, *et al.* Using physician billing claims from the Ontario Health  
46 394 Insurance Plan to determine individual influenza vaccination status: an updated validation study. *C*  
47 395 *Open* 2016;**4**:E470.  
48  
49 396 32 Sullivan SG, Cowling BJ. ‘Crude Vaccine Effectiveness’ Is a Misleading Term in Test-negative Studies  
50 397 of Influenza Vaccine Effectiveness. *Epidemiology* 2015;**26**:e60. doi:10.1097/EDE.0000000000000343  
51  
52 398 33 Skowronski DM, Janjua NZ, De Serres G, *et al.* Low 2012–13 influenza vaccine effectiveness  
53 399 associated with mutation in the egg-adapted H3N2 vaccine strain not antigenic drift in circulating  
54 400 viruses. *PLoS One* 2014;**9**:e92153. doi:10.1371/journal.pone.0092153  
55  
56 401 34 Skowronski DM, Chambers C, Sabaiduc S, *et al.* Interim estimates of 2013/14 vaccine effectiveness  
57 402 against influenza A(H1N1)PDM09 from Canada’s sentinel surveillance network, January 2014.

- 1  
2  
3 403 *Eurosurveillance* 2014;**19**.
- 4  
5 404 35 Sullivan SG, Tchetgen Tchetgen J. E, Cowling BJ. Theoretical Basis of the Test-Negative Study  
6 405 Design for Assessment of Influenza Vaccine Effectiveness. *Am J Epidemiol* 2016;**184**:345–53.  
7 406 doi:10.1093/aje/kww064
- 8  
9 407 36 Orton L, Lloyd-Williams F, Taylor-Robinson D, *et al*. The use of research evidence in public health  
10 408 decision making processes: systematic review. *PLoS One*;e21704. doi:10.1371/journal.pone.0021704
- 11  
12 409 37 Savel TG, Foldy S. The role of public health informatics in enhancing public health surveillance.  
13 410 *MMWR Suppl* 2012;**61**:20–4.
- 14  
15 411 38 Nelson JC, Jackson ML, Weiss NS, *et al*. New strategies are needed to improve the accuracy of  
16 412 influenza vaccine effectiveness estimates among seniors. *J Clin Epidemiol* 2009;**62**:687–94.  
17 413 doi:10.1016/j.jclinepi.2008.06.014
- 18  
19 414 39 Jackson LA, Jackson ML, Nelson JC, *et al*. Evidence of bias in estimates of influenza vaccine  
20 415 effectiveness in seniors. *Int J Epidemiol* 2006;**35**:337–  
21 416 44.[http://login.ezproxy.library.ualberta.ca/login?url=https://search.ebscohost.com/login.aspx?direct](http://login.ezproxy.library.ualberta.ca/login?url=https://search.ebscohost.com/login.aspx?direct=true&db=cmedm&AN=16368725&site=eds-live&scope=site)  
22 417 [=true&db=cmedm&AN=16368725&site=eds-live&scope=site](http://login.ezproxy.library.ualberta.ca/login?url=https://search.ebscohost.com/login.aspx?direct=true&db=cmedm&AN=16368725&site=eds-live&scope=site)
- 23  
24 418 40 Jackson LA, Nelson JC, Benson P, *et al*. Functional status is a confounder of the association of  
25 419 influenza vaccine and risk of all cause mortality in seniors. *Int J Epidemiol* 2006;**35**:345–52.
- 26  
27 420 41 Talbot HK, Nian H, Chen Q, *et al*. Evaluating the case-positive, control test-negative study design for  
28 421 influenza vaccine effectiveness for the frailty bias. *Vaccine* 2016;**34**:1806–9.  
29 422 doi:10.1016/j.vaccine.2016.02.037
- 30  
31 423 42 Feng S, Cowling BJ, Kelly H, *et al*. Estimating Influenza Vaccine Effectiveness With the Test-  
32 424 Negative Design Using Alternative Control Groups: A Systematic Review and Meta-Analysis. *Am J*  
33 425 *Epidemiol* 2018;**187**:389–97. doi:10.1093/aje/kwx251

426

Supplementary File - Using population-wide administrative and laboratory data to estimate type- and subtype-specific influenza vaccine effectiveness: a surveillance protocol

Appendix: List of CCP, CCI, and CMG codes utilized to define individuals who have had an organ transplant

**CCP Code Description**

|     |                                     |
|-----|-------------------------------------|
| 495 | Heart Transplantation               |
| 455 | Lung Transplant                     |
| 456 | Combined Heart-Lung Transplantation |
| 624 | Liver Transplant                    |
| 675 | Transplant of Kidney                |
| 648 | Transplant of Pancreas              |

**CCI Code Description**

|       |                                       |
|-------|---------------------------------------|
| 1HY85 | Transplant, Heart With Lung(S)        |
| 1HZ85 | Transplant, Heart Nec                 |
| 1GT85 | Transplant, Lung Nec                  |
| 1GR85 | Transplant, Lobe of Lung              |
| 1OA85 | Transplant, Liver                     |
| 1PC85 | Transplant, Kidney                    |
| 1OJ85 | Transplant, Pancreas                  |
| 1OK85 | Transplant, Pancreas With Duodenum    |
| 1NK85 | Transplant, Small Intestine           |
| 1NP85 | Transplant, Small And Large Intestine |

**CMG 1992 To 2005**

|     |                                        |
|-----|----------------------------------------|
| 175 | Heart or Lung Transplant               |
| 253 | Major Intestinal And Rectal Procedures |
| 310 | Liver Transplant                       |
| 311 | Major Pancreatic Procedures            |
| 500 | Kidney Transplant                      |

**CMG 2007 To 2016**

|     |                                                      |
|-----|------------------------------------------------------|
| 110 | Lung Transplant                                      |
| 160 | Heart Transplant                                     |
| 220 | Major Upper Gastrointestinal Reconstruction/Excision |
| 270 | Liver/Pancreas/Duodenum Transplant                   |
| 450 | Kidney Transplant                                    |



1  
2  
3 **Appendix: List of drug names and DINs utilized to define immunocompromising conditions**  
4  
5

| DIN      | Drug Name                          | Route of Administration | Strength |
|----------|------------------------------------|-------------------------|----------|
| 00616192 | ETOPOSIDE                          | CAP                     | 50MG     |
| 00523410 | ETOPOSIDE                          | IV SOL                  | 20MG/ML  |
| 02080036 | ETOPOSIDE                          | IV SOL                  | 20MG/ML  |
| 02241182 | ETOPOSIDE                          | IV SOL                  | 20MG/ML  |
| 02231622 | IRINOTECAN HCL                     | IV SOL                  | 20MG/ML  |
| 02258218 | IRINOTECAN HCL                     | IV SOL                  | 20MG/ML  |
| 00015431 | VINBLASTINE SULFATE                | IV PWS                  | 1MG/ML   |
| 00611182 | VINCRISTINE SULFATE                | IV SOL                  | 1MG/ML   |
| 02143305 | VINCRISTINE SULFATE                | IV SOL                  | 1MG/ML   |
| 00004618 | BUSULFAN                           | TAB                     | 2MG      |
| 00297763 | CARMUSTINE                         | IV PWS                  | 100MG    |
| 09851399 | CARMUSTINE                         | TOP SOL                 | NOT AVLE |
| 00004626 | CHLORAMBUCIL                       | TAB                     | 2MG      |
| 00344915 | CYCLOPHOSPHAMIDE                   | INJ PWS                 | 2GM      |
| 00013544 | CYCLOPHOSPHAMIDE                   | IV PWS                  | 200MG    |
| 00013552 | CYCLOPHOSPHAMIDE                   | IV PWS                  | 200MG    |
| 02241797 | CYCLOPHOSPHAMIDE                   | IV PWS                  | 200MG    |
| 02241799 | CYCLOPHOSPHAMIDE                   | IV PWS                  | 1000MG   |
| 00013749 | CYCLOPHOSPHAMIDE                   | TAB                     | 50MG     |
| 00262676 | CYCLOPHOSPHAMIDE                   | TAB                     | 25MG     |
| 00344877 | CYCLOPHOSPHAMIDE                   | TAB                     | 25MG     |
| 00344885 | CYCLOPHOSPHAMIDE                   | TAB                     | 50MG     |
| 02241795 | CYCLOPHOSPHAMIDE                   | TAB                     | 25MG     |
| 02241796 | CYCLOPHOSPHAMIDE                   | TAB                     | 50MG     |
| 02063794 | ESTRAMUSTINE DISODIUM<br>PHOSPHATE | CAP                     | 140MG    |
| 00780278 | ESTRAMUSTINE PHOSPHATE             | CAP                     | 140MG    |
| 00360414 | LOMUSTINE                          | CAP                     | 100MG    |
| 00360422 | LOMUSTINE                          | CAP                     | 40MG     |
| 00360430 | LOMUSTINE                          | CAP                     | 10MG     |
| 00016063 | MECHLORETHAMINE                    | IV PWS                  | 10MG     |
| 00004715 | MELPHALAN                          | TAB                     | 2MG      |
| 02312794 | TEMOZOLOMIDE                       | CAP                     | 140MG    |
| 02312816 | TEMOZOLOMIDE                       | CAP                     | 180MG    |
| 02395274 | TEMOZOLOMIDE                       | CAP                     | 20MG     |
| 02395282 | TEMOZOLOMIDE                       | CAP                     | 100MG    |
| 02395290 | TEMOZOLOMIDE                       | CAP                     | 140MG    |
| 02395312 | TEMOZOLOMIDE                       | CAP                     | 250MG    |
| 02443473 | TEMOZOLOMIDE                       | CAP                     | 5MG      |
| 02443481 | TEMOZOLOMIDE                       | CAP                     | 20MG     |

1  
2  
3  
4  
5  
6  
7  
8  
9  
10  
11  
12  
13  
14  
15  
16  
17  
18  
19  
20  
21  
22  
23  
24  
25  
26  
27  
28  
29  
30  
31  
32  
33  
34  
35  
36  
37  
38  
39  
40  
41  
42  
43  
44  
45  
46  
47  
48  
49  
50  
51  
52  
53  
54  
55  
56  
57  
58  
59  
60

| DIN      | Drug Name             | Route of Administration | Strength |
|----------|-----------------------|-------------------------|----------|
| 02443511 | TEMOZOLOMIDE          | CAP                     | 100MG    |
| 02443538 | TEMOZOLOMIDE          | CAP                     | 140MG    |
| 02443554 | TEMOZOLOMIDE          | CAP                     | 250MG    |
| 02241093 | TEMOZOLOMIDE          | CAP                     | 5MG      |
| 02241094 | TEMOZOLOMIDE          | CAP                     | 20MG     |
| 02241095 | TEMOZOLOMIDE          | CAP                     | 100MG    |
| 02241096 | TEMOZOLOMIDE          | CAP                     | 250MG    |
| 02441160 | TEMOZOLOMIDE          | CAPSULE                 | 5MG      |
| 00237035 | THIOTEPA              | INJ PWS                 | 15MG/ML  |
| 02421917 | CAPECITABINE          | FC TAB                  | 150MG    |
| 02421925 | CAPECITABINE          | FC TAB                  | 500MG    |
| 02426757 | CAPECITABINE          | FC TAB                  | 150MG    |
| 02426765 | CAPECITABINE          | FC TAB                  | 500MG    |
| 02400022 | CAPECITABINE          | TAB                     | 150MG    |
| 02400030 | CAPECITABINE          | TAB                     | 500MG    |
| 02238453 | CAPECITABINE          | TAB                     | 150MG    |
| 02238454 | CAPECITABINE          | TAB                     | 500MG    |
| 02022117 | CLADRIBINE            | IV SOL                  | 1MG      |
| 00194727 | CYTARABINE            | INJ PWS                 | 500MG    |
| 00386715 | CYTARABINE            | INJ PWS                 | 100MG    |
| 02167867 | CYTARABINE            | INJ PWS                 | 100MG    |
| 00646296 | CYTARABINE            | IV PWS                  | 1GM      |
| 00646318 | CYTARABINE            | IV PWS                  | 2GM      |
| 02246226 | FLUDARABINE PHOSPHATE | TAB                     | 10MG     |
| 00012882 | FLUOROURACIL          | IV SOL                  |          |
| 00330582 | FLUOROURACIL          | TOP CRM                 | 5%       |
| 00465283 | HYDROXYUREA           | CAP                     | 500MG    |
| 02242920 | HYDROXYUREA           | CAP                     | 500MG    |
| 02247937 | HYDROXYUREA           | CAP                     | 500MG    |
| 00004723 | MERCAPTOPYRINE        | TAB                     | 50MG     |
| 02415275 | MERCAPTOPYRINE        | TABLET                  | 50MG     |
| 09857520 | METHOTREXATE          | INJ SOL                 | 50MG/2ML |
| 02182777 | METHOTREXATE          | INJ SOL                 | 25MG/ML  |
| 02182955 | METHOTREXATE          | INJ SOL                 | 25MG/ML  |
| 00014915 | METHOTREXATE          | TAB                     | 2.5MG    |
| 02170698 | METHOTREXATE          | TAB                     | 2.5MG    |
| 02182750 | METHOTREXATE          | TAB                     | 10MG     |
| 02182963 | METHOTREXATE          | TAB                     | 2.5MG    |
| 02244798 | METHOTREXATE          | TAB                     | 2.5MG    |
| 02398427 | METHOTREXATE          | VIAL                    | 25MG/ML  |
| 00321397 | METHOTREXATE DISODIUM | INJ SOL                 | 2.5MG/ML |
| 00321400 | METHOTREXATE DISODIUM | INJ SOL                 | 2.5MG/ML |

| DIN      | Drug Name              | Route of Administration | Strength   |
|----------|------------------------|-------------------------|------------|
| 02170663 | METHOTREXATE DISODIUM  | INJ SOL                 | 50MG/2ML   |
| 02170671 | METHOTREXATE DISODIUM  | INJ SOL                 | 2.5MG/ML   |
| 02182947 | METHOTREXATE SODIUM    | INJ SOL                 | 10MG/ML    |
| 00614335 | METHOTREXATE SODIUM    | IV SOL                  | 10MG/ML    |
| 00874132 | METHOTREXATE SODIUM    | TAB                     | 2.5MG      |
| 02171767 | METHOTREXATE SODIUM    | TAB                     | 2.5MG      |
| 00282081 | THIOGUANINE            | TAB                     | 40MG       |
| 02384256 | CRIZOTINIB             | CAP                     | 200MG      |
| 02384264 | CRIZOTINIB             | CAP                     | 250MG      |
| 02409607 | DABRAFENIB             | CAP                     | 50MG       |
| 02409615 | DABRAFENIB             | CAP                     | 75MG       |
| 02320193 | DASATINIB              | TAB                     | 100MG      |
| 02293129 | DASATINIB              | TAB                     | 20MG       |
| 02293137 | DASATINIB              | TAB                     | 50MG       |
| 02293145 | DASATINIB              | TAB                     | 70MG       |
| 02269007 | ERLOTINIB HCL          | TAB                     | 25MG       |
| 02269015 | ERLOTINIB HCL          | TAB                     | 100MG      |
| 02269023 | ERLOTINIB HCL          | TAB                     | 150MG      |
| 02377705 | ERLOTINIB HCL          | TABLET                  | 100MG      |
| 02377713 | ERLOTINIB HCL          | TABLET                  | 150MG      |
| 02434407 | IBRUTINIB              | CAP                     | 140MG      |
| 09857447 | IMATINIB MESYLATE      | TAB                     | 100MG      |
| 02388006 | RUXOLITINIB            | TAB                     | 5MG        |
| 02388014 | RUXOLITINIB            | TAB                     | 15MG       |
| 02388022 | RUXOLITINIB            | TAB                     | 20MG       |
| 02409658 | TRAMETINIB RECOMBINANT | TAB                     | 2MG        |
| 01926438 | ASPARAGINASE           | INJ PWS                 | 10MU       |
| 02389649 | AXITINIB               | TAB                     | 5MG        |
| 02389630 | AXITINIB               | TAB FC                  | 1MG        |
| 02262452 | BORTEZOMIB             | IV PWS                  | 3.5MG      |
| 00521183 | DACARBAZINE            | IV PWS                  | 200MG/VIAL |
| 02154854 | DACARBAZINE            | IV PWS                  | 200MG      |
| 02248676 | GEFITINIB              | TAB                     | 250MG      |
| 02244725 | IMATINIB MESYLATE      | CAP                     | 100MG      |
| 02399806 | IMATINIB MESYLATE      | FC TAB                  | 100MG      |
| 02355337 | IMATINIB MESYLATE      | TAB                     | 100MG      |
| 02355345 | IMATINIB MESYLATE      | TAB                     | 400MG      |
| 02397285 | IMATINIB MESYLATE      | TAB                     | 100MG      |
| 02397293 | IMATINIB MESYLATE      | TAB                     | 400MG      |
| 02399814 | IMATINIB MESYLATE      | TAB                     | 400MG      |
| 02431114 | IMATINIB MESYLATE      | TAB                     | 100MG      |
| 02431122 | IMATINIB MESYLATE      | TAB                     | 400MG      |

1  
2  
3  
4  
5  
6  
7  
8  
9  
10  
11  
12  
13  
14  
15  
16  
17  
18  
19  
20  
21  
22  
23  
24  
25  
26  
27  
28  
29  
30  
31  
32  
33  
34  
35  
36  
37  
38  
39  
40  
41  
42  
43  
44  
45  
46  
47  
48  
49  
50  
51  
52  
53  
54  
55  
56  
57  
58  
59  
60

| DIN      | Drug Name              | Route of Administration | Strength   |
|----------|------------------------|-------------------------|------------|
| 09857448 | IMATINIB MESYLATE      | TAB                     | 400MG      |
| 02253275 | IMATINIB MESYLATE      | TAB                     | 100MG      |
| 02253283 | IMATINIB MESYLATE      | TAB                     | 400MG      |
| 02326442 | LAPATINIB DITOSYLATE   | TAB                     | 250MG      |
| 02315874 | NILOTINIB              | CAP                     | 200MG      |
| 02368250 | NILOTINIB              | CAP                     | 150MG      |
| 02352303 | PAZOPANIB HCL          | TAB                     | 200MG      |
| 00012750 | PROCARBAZINE HCL       | CAP                     | 50MG       |
| 02403390 | REGORAFENIB            | TAB                     | 40MG       |
| 02284227 | SORAFENIB TOSYLATE     | TAB                     | 200MG      |
| 02280795 | SUNITINIB MALATE       | CAP                     | 12.5MG     |
| 02280809 | SUNITINIB MALATE       | CAP                     | 25MG       |
| 02280817 | SUNITINIB MALATE       | CAP                     | 50MG       |
| 02258595 | ADALIMUMAB             | INJ-SC SOL              | 40MG       |
| 09854785 | ADALIMUMAB             | INJ-SC SOL              | 40MG       |
| 09857294 | ADALIMUMAB             | INJ-SC SOL              | 40MG       |
| 09857326 | ADALIMUMAB             | INJ-SC SOL              | 40MG       |
| 09857327 | ADALIMUMAB             | INJ-SC SOL              | 40MG       |
| 02130181 | ALDESLEUKIN            | IV PWS                  | 1.3MG      |
| 02331675 | CERTOLIZUMAB PEGOL     | INJ-SC SOL              | 200MG/ML   |
| 09857394 | ETANERCEPT RECOMBINANT | INJ SOL                 | 50MG/ML    |
| 02242903 | ETANERCEPT RECOMBINANT | INJ-SC PWS              | 25MG       |
| 02274728 | ETANERCEPT RECOMBINANT | INJ-SC SOL              | 50MG/ML    |
| 09857322 | ETANERCEPT RECOMBINANT | INJ-SC SOL              | 50MG/ML    |
| 02233014 | GLATIRAMER             | INJ-SC PWS              | 20MG       |
| 02245619 | GLATIRAMER             | INJ-SC SOL              | 20MG/ML    |
| 02324776 | GOLIMUMAB RECOMBINANT  | INJ-SC SOL              | 50MG/0.5ML |
| 02324784 | GOLIMUMAB RECOMBINANT  | INJ-SC SOL              | 50MG/0.5ML |
| 02244016 | INFLIXIMAB             | IV PWS                  | 100MG      |
| 09852956 | INFLIXIMAB             | IV PWS                  | 100MG      |
| 02419475 | INFLIXIMAB             | PWD VIAL                | 100MG      |
| 02239832 | INTERFERON             | INJ-SC SOL              | 0.03MG/ML  |
| 09852751 | INTERFERON             | OPH SOL                 | 1MU/ML     |
| 02223384 | INTERFERON ALFA 2B     | INJ PWS                 | 3MMU       |
| 02223392 | INTERFERON ALFA 2B     | INJ PWS                 | 5MMU       |
| 02223406 | INTERFERON ALFA 2B     | INJ PWS                 | 10MMU      |
| 02231651 | INTERFERON ALFA 2B     | INJ PWS                 | 18MMU      |
| 00889067 | INTERFERON ALFA 2B     | INJ SOL                 | 10MMU/2ML  |
| 02223414 | INTERFERON ALFA 2B     | INJ SOL                 | 10MMU/2ML  |
| 02238674 | INTERFERON ALFA 2B     | INJ SOL                 | 3MMU/0.5ML |
| 02238675 | INTERFERON ALFA 2B     | INJ SOL                 | 5MMU/0.5ML |
| 09853995 | INTERFERON ALFA 2B     | INJ SOL                 | 10MU/VIAL  |

| DIN      | Drug Name             | Route of Administration | Strength     |
|----------|-----------------------|-------------------------|--------------|
| 09854045 | INTERFERON ALFA 2B    | INJ SOL                 | 3MMU/0.5ML   |
| 09854053 | INTERFERON ALFA 2B    | INJ SOL                 | 5MMU/0.5ML   |
| 00705896 | INTERFERON ALFA 2B    | INJ-SC SOL              | 3MMU         |
| 00705918 | INTERFERON ALFA 2B    | INJ-SC SOL              | 5MMU         |
| 00705926 | INTERFERON ALFA 2B    | INJ-SC SOL              | 10MMU        |
| 02240693 | INTERFERON ALFA 2B    | INJ-SC SOL              | 18MMU/1.2ML  |
| 02240694 | INTERFERON ALFA 2B    | INJ-SC SOL              | 30MMU/1.2ML  |
| 02240695 | INTERFERON ALFA 2B    | INJ-SC SOL              | 60MMU/1.2ML  |
| 01911988 | INTERFERON ALFA-2A    | INJ PWS                 | 3000MU/ML    |
| 01911996 | INTERFERON ALFA-2A    | INJ PWS                 | 9000MU/ML    |
| 01912003 | INTERFERON ALFA-2A    | INJ PWS                 | 6000MU/ML    |
| 00812471 | INTERFERON ALFA-2A    | INJ PWS                 | 6000MU/ML    |
| 00812498 | INTERFERON ALFA-2A    | INJ SOL                 | 6000MU/ML    |
| 00812501 | INTERFERON ALFA-2A    | INJ SOL                 | 3000MU/ML    |
| 02217015 | INTERFERON ALFA-2A    | INJ SOL                 | 3000MU/ML    |
| 02217031 | INTERFERON ALFA-2A    | INJ SOL                 | 6000MU/ML    |
| 02217058 | INTERFERON ALFA-2A    | INJ SOL                 | 9000MU/ML    |
| 02217066 | INTERFERON ALFA-2A    | INJ SOL                 | 18000MU/ML   |
| 02019914 | INTERFERON ALFA-2A    | INJ SOL                 | 9000MU/ML    |
| 01959069 | INTERFERON ALPHA-N1   | INJ SOL                 | 10MU         |
| 01959077 | INTERFERON ALPHA-N1   | INJ SOL                 | 3MU          |
| 00709042 | INTERFERON ALPHA-N1   | INJ SOL                 | 3MU          |
| 00709050 | INTERFERON ALPHA-N1   | INJ SOL                 | 10MU         |
| 02169649 | INTERFERON BETA       | INJ-SC PWS              | 0.3MG        |
| 02237317 | INTERFERON BETA 1A    | INJ PWS                 | 11MCG        |
| 02237318 | INTERFERON BETA 1A    | INJ PWS                 | 44MCG        |
| 02237770 | INTERFERON BETA 1A    | INJ-IM PWS              | 30MCG/1.1ML  |
| 02269201 | INTERFERON BETA 1A    | INJ-IM SOL              | 30MCG/0.5ML  |
| 02318253 | INTERFERON BETA 1A    | INJ-SC SOL              | 66MCG/1.5ML  |
| 02318261 | INTERFERON BETA 1A    | INJ-SC SOL              | 132MCG/1.5ML |
| 02237319 | INTERFERON BETA 1A    | INJ-SC SOL              | 22MCG/0.5ML  |
| 02237320 | INTERFERON BETA 1A    | INJ-SC SOL              | 44MCG/0.5ML  |
| 09857395 | INTERFERON BETA-1A    | PREF AUTOINJ PEN        | 30MCG/0.5ML  |
| 02337819 | INTERFERON BETA-1B    | RECOMBINANT             | INJ-SC PWS   |
| 00846368 | RECOMBINANT           | INJ-SC PWS              | 0.3MG        |
| 02234217 | LEVAMISOLE HCL        | TAB                     | 50MG         |
| 02234217 | LEVAMISOLE HCL        | TAB                     | 50MG         |
| 09857505 | PEGINTERFERON ALFA 2A | RECOMBINANT             | INJ-SC SOL   |
| 09857505 | RECOMBINANT           | INJ-SC SOL              | 180MCG/0.5ML |
| 02248077 | PEGINTERFERON ALFA 2A | RECOMBINANT             | INJ-SC SOL   |
| 02248077 | RECOMBINANT           | INJ-SC SOL              | 180MCG/0.5ML |
| 02248078 | PEGINTERFERON ALFA 2A | RECOMBINANT             | INJ-SC SOL   |
| 02248078 | RECOMBINANT           | INJ-SC SOL              | 180MCG/ML    |

| DIN      | Drug Name         | Route of Administration | Strength |
|----------|-------------------|-------------------------|----------|
| 00258482 | BLEOMYCIN SULFATE | INJ PWS                 | 15U      |
| 00163899 | DAUNORUBICIN HCL  | INJ PD                  | 20MG     |
| 01926683 | DAUNORUBICIN HCL  | IV PWS                  | 20MG     |
| 00353078 | DOXORUBICIN HCL   | IV PWS                  | 50MG     |
| 00357391 | DOXORUBICIN HCL   | IV PWS                  | 10MG     |
| 00640050 | EPIRUBICIN HCL    | INJ PWS                 | 10MG     |
| 00640069 | EPIRUBICIN HCL    | IV PWS                  | 50MG     |
| 00381799 | MITOMYCIN         | IV PWS                  | 5MG      |
| 00463221 | MITOTANE          | TAB                     | 500MG    |
| 02415992 | AFLIBERCEPT       | VIAL                    | 40MG/ML  |
| 02273993 | ALEMTUZUMAB       | IV SOL                  | 10MG/ML  |
| 02290960 | ALEMTUZUMAB       | IV SOL                  | 30MG/ML  |
| 02270994 | BEVACIZUMAB       | IV SOL                  | 25MG/ML  |
| 09857407 | RITUXIMAB         | IV SOL                  | 10MG/ML  |
| 02241927 | RITUXIMAB         | IV SOL                  | 10MG/ML  |

**Appendix: ICD-9 codes and ICD-10 codes utilized to define acute respiratory illness in physician,  
ER and hospital encounters.**

| <b>Description</b>                                                     | <b>ICD-9 Code</b>           | <b>ICD-10 Code</b>         |
|------------------------------------------------------------------------|-----------------------------|----------------------------|
| Viral infection, unspecified site                                      | 079                         | B34                        |
| Viral agents as the cause of diseases<br>classified to other chapters  | --                          | B97 (but not B973 or B977) |
| Acute nasopharyngitis (common cold)                                    | 460                         | J00                        |
| Acute sinusitis                                                        | 461                         | J01                        |
| Acute pharyngitis                                                      | 462                         | J02                        |
| Acute tonsillitis                                                      | 463                         | J03                        |
| Acute laryngitis, tracheitis, epiglottitis,<br>croup                   | 464                         | J04, J05                   |
| Acute upper respiratory infections of<br>multiple or unspecified sites | 465                         | J06                        |
| Influenza due to identified novel<br>influenza A virus                 | 488                         | J09                        |
| Influenza                                                              | 487                         | J10, J11                   |
| Pneumonia, organism unspecified                                        | 486                         | --                         |
| Viral pneumonia                                                        | 480                         | J12                        |
| Bacterial pneumonia                                                    | 481, 482                    | J13, J14, J15              |
| Pneumonia due to other specified<br>organism                           | 483                         | J16                        |
| Pneumonia in infectious diseases<br>classified elsewhere               | 484                         | J17                        |
| Bronchopneumonia, organism<br>unspecified                              | 485                         | J18                        |
| Acute bronchitis and bronchiolitis                                     | 466                         | J20, J21                   |
| Unspecified diseases respiratory system                                | 519                         | J22, J39.8, J39.9          |
| Bronchitis, not specified as acute or<br>chronic                       | 490                         | J40                        |
| Acute respiratory distress syndrome                                    | 518.82                      | J80                        |
| Pulmonary edema                                                        | 518.4                       | J81                        |
| Pleural effusion                                                       | 510.9, 511.0, 511.1, 511.89 | J86.9, J90, R09.1          |
| Respiratory failure                                                    | 518.81                      | J96.0, J96.9               |
| Atelectasis                                                            | --                          | J98.10                     |
| Pulmonary collapse                                                     | 518.0                       | J98.19                     |
| Other respiratory disorders                                            | 786.00, 786.09              | J98.0, J98.4, J98.8, J98.9 |
| Hemoptysis                                                             | 786.30                      | R04.2                      |
| Cough                                                                  | 786.2                       | R05                        |
| Shortness of breath (dyspnea)                                          | 786.02, 786.05, 786.09      | R06.0                      |
| Stridor                                                                | 786.1                       | R06.1                      |
| Wheezing                                                               | 786.07                      | R06.2                      |
| Tachypnea                                                              | 786.06                      | R06.4                      |

| Description             | ICD-9 Code              | ICD-10 Code  |
|-------------------------|-------------------------|--------------|
| Chest pain on breathing | 786.52                  | R07.1        |
| Hypoxemia               | 799.02                  | R09.0        |
| Respiratory arrest      | 799.1                   | R09.2        |
| Abnormal sputum         | 786.4                   | R09.3        |
| Nasal congestion        | 478.19                  | R09.81       |
| Abnormal chest sounds   | 786.7                   | R09.89       |
| Fever                   | 780.60                  | R50          |
| Chills (without fever)  | 780.64                  | R68.0        |
| Sepsis, shock           | 669.11, 669.12, 669.14, | A41.9, R57.9 |
|                         | 785.50, 785.52, 995.91, |              |
|                         | 995.92                  |              |

For peer review only



# BMJ Open

## Using population-wide administrative and laboratory data to estimate type- and subtype-specific influenza vaccine effectiveness: a surveillance protocol

|                                 |                                                                                                                                                                                                                                                                                                                                                                                                                                                                                                                                                                                                                     |
|---------------------------------|---------------------------------------------------------------------------------------------------------------------------------------------------------------------------------------------------------------------------------------------------------------------------------------------------------------------------------------------------------------------------------------------------------------------------------------------------------------------------------------------------------------------------------------------------------------------------------------------------------------------|
| Journal:                        | <i>BMJ Open</i>                                                                                                                                                                                                                                                                                                                                                                                                                                                                                                                                                                                                     |
| Manuscript ID                   | bmjopen-2019-029708.R2                                                                                                                                                                                                                                                                                                                                                                                                                                                                                                                                                                                              |
| Article Type:                   | Protocol                                                                                                                                                                                                                                                                                                                                                                                                                                                                                                                                                                                                            |
| Date Submitted by the Author:   | 19-Jun-2019                                                                                                                                                                                                                                                                                                                                                                                                                                                                                                                                                                                                         |
| Complete List of Authors:       | Scott, Allison; Government of Alberta, Ministry of Health; PolicyWise for Children & Families<br>Buchan, Sarah; Institute for Clinical Evaluative Sciences; Public Health Ontario<br>Kwong, Jeff; Institute for Clinical Evaluative Sciences<br>Drews, Steven; Alberta Provincial Laboratory for Public Health; University of Alberta, Division of Preventive Medicine<br>Simmonds, Kimberley; Alberta Ministry of Health, Epidemiology and Surveillance<br>Svenson, Lawrence; Government of Alberta, Ministry of Health; University of Calgary Cumming School of Medicine, Department of Community Health Sciences |
| <b>Primary Subject Heading</b>: | Public health                                                                                                                                                                                                                                                                                                                                                                                                                                                                                                                                                                                                       |
| Secondary Subject Heading:      | Infectious diseases, Public health, Epidemiology                                                                                                                                                                                                                                                                                                                                                                                                                                                                                                                                                                    |
| Keywords:                       | Influenza, Vaccine effectiveness, Case Control, Test-negative, Administrative data, Population level                                                                                                                                                                                                                                                                                                                                                                                                                                                                                                                |
|                                 |                                                                                                                                                                                                                                                                                                                                                                                                                                                                                                                                                                                                                     |

SCHOLARONE™  
Manuscripts

1  
2  
3 1 **TITLE**

4  
5 2 **Using population-wide administrative and laboratory data to estimate type- and subtype-specific**  
6 3 **influenza vaccine effectiveness: a surveillance protocol**

7  
8 4 Allison N Scott<sup>1,2,3</sup>

9  
10 5 Sarah A Buchan<sup>4,5,6</sup>

11  
12 6 Jeffrey C Kwong<sup>4,5,6,7,8</sup>

13  
14 7 Steven J Drews<sup>9,10</sup>

15  
16 8 Kimberley A Simmonds<sup>1,11</sup>

17  
18 9 Lawrence W Svenson<sup>1,11, 12, 13</sup>

19  
20  
21 10

22 11 **Affiliations**

23  
24 12 <sup>1</sup>Ministry of Health, Government of Alberta, Edmonton, AB, Canada

25  
26 13 <sup>2</sup>PolicyWise for Children & Families, Edmonton, AB, Canada

27  
28 14 <sup>3</sup>Department of Public Health, Concordia University of Edmonton, AB, Canada

29  
30 15 <sup>4</sup>ICES, Toronto, ON, Canada

31  
32 16 <sup>5</sup>Public Health Ontario, Toronto, ON, Canada

33  
34 17 <sup>6</sup>Dalla Lana School of Public Health, University of Toronto, Toronto, ON, Canada

35  
36 18 <sup>7</sup>Department of Family & Community Medicine, University of Toronto, Toronto, ON, Canada

37  
38 19 <sup>8</sup>University Health Network, Toronto, ON, Canada

39  
40 20 <sup>9</sup>The Alberta Provincial Laboratory for Public Health, Edmonton, AB, Canada

41  
42 21 <sup>10</sup>Department of Laboratory Medicine & Pathology, University of Alberta, Edmonton, AB, Canada

43  
44 22 <sup>11</sup> Department of Community Health Sciences, Cumming School of Medicine, University of Calgary, Calgary,  
45 23 AB, Canada

46  
47 24 <sup>12</sup> School of Public Health, University of Alberta, Edmonton, AB, Canada

48  
49 25 <sup>13</sup> Division of Preventive Medicine, University of Alberta, Edmonton, AB, Canada

50  
51  
52 26

53  
54 27 **Corresponding Author:**

55  
56 28 Allison N. Scott, Ph.D.

1  
2  
3 29 PolicyWise for Children & Families  
4  
5 30 1000, 9925-109 Street NW  
6  
7 31 Edmonton, Alberta, Canada T5K 2J8  
8

9 32

10  
11 33 **Email Addresses**

12  
13 34 Allison N Scott AScott@policywise.com  
14  
15 35 Sarah A Buchan Sarah.Buchan@oahpp.ca  
16  
17 36 Jeffrey C Kwong jeff.kwong@utoronto.ca  
18  
19 37 Steven J Drews steven.drews@blood.ca  
20  
21 38 Kimberley A Simmonds kimberley.simmonds@gov.ab.ca  
22  
23 39 Lawrence W Svenson larry.svenson@gov.ab.ca  
24

25 40

26  
27 41

28  
29 42 **Word Count:** 2,550  
30  
31  
32  
33  
34  
35  
36  
37  
38  
39  
40  
41  
42  
43  
44  
45  
46  
47  
48  
49  
50  
51  
52  
53  
54  
55  
56  
57  
58  
59  
60

1  
2  
3 **43 ABSTRACT**

4  
5 **44 Introduction**

6  
7 45 The appropriateness of using routinely collected laboratory data combined with administrative data for  
8  
9 46 estimating influenza vaccine effectiveness (VE) is still being explored. This paper outlines a protocol to  
10  
11 47 estimate influenza VE using linked laboratory and administrative data which could act as a companion to  
12  
13 48 estimates derived from other methods.

14  
15  
16 **49 Methods and Analysis**

17  
18 50 We will use the test-negative design to estimate VE for each influenza type/subtype and season. Province-  
19  
20 51 wide individual-level records of positive and negative influenza tests at the Provincial Laboratory for Public  
21  
22 52 Health in Alberta will be linked, by unique personal health numbers, to administrative databases and  
23  
24 53 vaccination records held at the Ministry of Health in Alberta to determine covariates and influenza  
25  
26 54 vaccination status, respectively. Covariates of interests include age, sex, immunocompromising chronic  
27  
28 55 conditions, and healthcare setting. Cases will be defined based on an individual's first positive influenza test  
29  
30 56 during the season, and potential controls will be defined based on an individual's first negative influenza test  
31  
32 57 during the season. One control for each case will be randomly selected based on the week the specimen was  
33  
34 58 collected. We will estimate vaccine effectiveness using multivariable logistic regression.

35  
36  
37 **59 Ethics and Dissemination**

38  
39 60 Ethics approval was obtained from the University of Alberta's Health Research Ethics Board – Health Panel  
40  
41 61 under study ID Pro00075997. Results will be disseminated by public health officials in Alberta.  
42  
43  
44  
45  
46  
47  
48  
49  
50  
51  
52  
53  
54  
55  
56  
57  
58  
59  
60

1  
2  
3 65 **Key Words**  
4

5 66 Influenza  
6

7 67 Vaccine effectiveness  
8

9 68 Case Control  
10

11 69 Test-negative  
12

13 70 Administrative data  
14

15 71 Population-level  
16

17 72 Laboratory data  
18

19 73 Vaccination database  
20

21 74  
22  
23  
24  
25  
26  
27  
28  
29  
30  
31  
32  
33  
34  
35  
36  
37  
38  
39  
40  
41  
42  
43  
44  
45  
46  
47  
48  
49  
50  
51  
52  
53  
54  
55  
56  
57  
58  
59  
60

For peer review only

1  
2  
3 75 **ARTICLE SUMMARY**  
4

5 76 **Strengths and limitations of this study**  
6

- 7 77 • A strength of this protocol is that it provides near real time estimation of vaccine effectiveness to  
8 78 assist public health in allocating resources and determining the appropriate policies and public  
9 79 messaging during the influenza season.  
10 79  
11 80 • Vaccine effectiveness estimates use a test negative design, taking advantage of linked administrative  
12 81 health records for the entire population.  
13 82  
14 82 • While many confounders are included in the vaccine effectiveness estimates, not all known  
15 83 confounders can be measured using administrative health data.  
16  
17 84

18  
19  
20  
21  
22  
23  
24  
25  
26  
27  
28  
29  
30  
31  
32  
33  
34  
35  
36  
37  
38  
39  
40  
41  
42  
43  
44  
45  
46  
47  
48  
49  
50  
51  
52  
53  
54  
55  
56  
57  
58  
59  
60

For peer review only

## 85 INTRODUCTION

86 Influenza is a respiratory viral disease associated with significant morbidity and mortality globally. Infections  
87 range from relatively mild presentations (e.g. cough, sore throat) to severe lower respiratory tract infections  
88 (e.g. pneumonia). Severe cases may be associated with hospitalization, intensive care admission, and death;  
89 young children, the elderly, and individuals with chronic conditions are at highest risk of severe outcomes[1].  
90 In Canada, rates of laboratory-confirmed influenza infections are, on average, approximately 200 cases per  
91 100,000 population, with approximately 50% of cases occurring in patients aged  $\leq 18$  years [2]. The causative  
92 agents, influenza A (subtypes H3N2 and H1N1pdm(09)) and influenza B (Yamagata and Victoria lineages),  
93 are under strong selective pressure to mutate genetically; significant genetic changes can occur in relatively  
94 short periods of time (i.e.  $< 1$  year) [3].

95 Influenza prevention relies, in part, on annual vaccination campaigns. Selection of viral strains for inclusion  
96 in the vaccine occurs approximately 9 months prior to the onset of the influenza season; by the time the  
97 vaccines are administered, the predominant circulating strains may have mutated to the point such that the  
98 effectiveness of the vaccine has diminished or has become completely ineffective [4,5].

99 Influenza VE is commonly estimated using the test-negative design, a variation of the case-control design  
100 where cases and controls are selected from a pool of individuals who have been tested for influenza [6–10].  
101 Several research groups use sentinel physician networks to recruit patients: influenza testing is performed on  
102 patients who meet a case definition for influenza-like illness, and cases and controls are selected from that  
103 pool [6–8]. While this has become an established method, there are some limitations to using sentinel  
104 physicians. As the physicians are often volunteers, there can be bias in the geographic distribution, leading to  
105 clustering of sampling in certain areas and not others. This can lead to inaccuracies as predominant  
106 circulating influenza strains vary geographically [7,11]. Immunization information is commonly self-reported,  
107 potentially leading to recall and social desirability biases [12]; volunteer physicians may be more likely to have  
108 strong views on influenza immunization, potentially making it more difficult for the patient to admit to not  
109 being immunized. Finally, as these studies are labour-intensive for clinic staff, physician recruitment is often

1  
2  
3 110 low, resulting in small sample sizes and wide confidence intervals. Estimates are, therefore, typically available  
4  
5 111 after the peak of the influenza season, decreasing their usefulness for public health messaging and resource  
6  
7 112 and operational planning [6–8,11].  
8  
9

10 113 Using administrative data and routinely collected clinical specimens for estimating VE is currently under  
11  
12 114 debate [13]. VE estimates generated using linked health administrative and laboratory data in the province  
13  
14 115 Ontario have been shown to be comparable to previously published estimates[14]. There has been one  
15  
16 116 published estimate of Alberta-specific vaccine effectiveness using a sentinel surveillance system[11]; however,  
17  
18 117 because of the small sample size the confidence interval was large, ranging from 8% to 72%. Estimating VE  
19  
20 118 in a large jurisdiction with near-real-time data on all influenza laboratory testing and influenza vaccination in  
21  
22 119 the population has the potential to provide more precise and timely VE estimates than has previously been  
23  
24 120 possible. We present a protocol to estimate influenza VE using individually-linked laboratory and  
25  
26 121 administrative data.  
27  
28

29  
30 122

## 31 32 123 **METHODS AND ANALYSIS**

### 33 34 35 124 **Study Setting:**

36  
37  
38 125 Alberta is a province in Canada with a publicly-funded universal health care system; each of the 4.25 million  
39  
40 126 residents is assigned a unique personal health number (PHN) at birth or upon immigration to the province  
41  
42 127 [15]. The PHN is recorded each time a person accesses the healthcare system, allowing for deterministic  
43  
44 128 linkage across multiple administrative data sets held by the Ministry of Health.

45  
46  
47 129 In 2009, influenza vaccination became universally available to all Albertans aged  $\geq 6$  months, regardless of  
48  
49 130 comorbidities or other risk conditions [16]. Influenza vaccines are available at no cost to the patient at public  
50  
51 131 health clinics, pharmacies, physician offices, long-term care facilities, university health centers, and  
52  
53 132 workplaces. Annual vaccine campaigns begin in October, with approximately 60% of all influenza  
54  
55 133 vaccinations given by the end of the second week of the campaign. While the peak of influenza activity has  
56  
57



1  
2  
3 134 varied widely since 2010, the median influenza peak in Alberta is in mid-January, approximately three months  
4  
5 135 after vaccination campaigns begin.  
6  
7

8 136

### 11 137 **Laboratory methods for influenza A and B detection and influenza A subtyping**

12  
13 138 All influenza testing in Alberta is performed at a single diagnostic lab, the Provincial Laboratory for Public  
14  
15 139 Health (ProvLab) and stored in a single laboratory information system, along with test and patient identifiers.  
16  
17 140 Clinical specimens (e.g. nasopharyngeal swabs, nasopharyngeal aspirates, bronchoalveolar lavages) are  
18  
19 141 processed at ProvLab using previously published protocols. Nucleic acid extraction utilizes the easyMAG  
20  
21 142 extractor and reagents (bioMerieux, St. Laurent, Quebec, Canada)[17]. Nucleic acid from clinical specimens are  
22  
23 143 then tested using a series of respiratory detection assays as described below. Prior to May 2017, a real-time  
24  
25 144 influenza A/B reverse-transcriptase PCR (RT-PCR) was used to diagnose influenza using a protocol  
26  
27 145 previously described [18,19]. After May 2017, ProvLab has been using a Luminex Respiratory Pathogen Panel  
28  
29 146 for the identification of influenza A (including subtype), influenza B, and other respiratory viruses (e.g.  
30  
31 147 coronavirus and parainfluenza) [15]. Results of the laboratory testing were imported into specific laboratory  
32  
33 148 information systems depending on the testing time period.  
34  
35

36 149

### 38 150 **Study Design:**

39  
40  
41 151 We will use the test-negative design to estimate VE. We will estimate VE for the 2011/12 – 2019/20  
42  
43 152 influenza seasons. The results of all respiratory virus tests conducted at ProvLab will be sent to the Ministry  
44  
45 153 of Health for deterministic linkage to health administrative databases, in order to determine eligibility for  
46  
47 154 inclusion in the analysis, influenza vaccination status, and the following covariates: age, sex, socio-economic  
48  
49 155 status, geographic zone of residence, history of immunocompromising comorbidities, healthcare setting  
50  
51 156 (inpatient or outpatient setting), and month at the time of specimen submission. The presence of a diagnostic  
52  
53 157 code for an acute respiratory illness (ARI) at the time of specimen collection will be used in a sensitivity  
54  
55 158 analysis.  
56  
57  
58  
59  
60

1  
2  
3 159 Isolates will be considered eligible for inclusion in the analysis if they met all of the following criteria: a valid  
4  
5 160 PHN is recorded, the isolate is not from a resident of a long-term care facility, the isolate was collected at  
6  
7 161 least four weeks after the initiation of the public influenza vaccination program, and the isolate was collected  
8  
9 162 during the influenza season, as determined using the method recommended by the WHO r [20–22].  
10  
11

12 163 It is important to ensure that the population has the chance to be exposed to influenza and there is sufficient  
13  
14 164 time for immunity to the vaccine to be developed. Residence in a long-term care facility will be determined  
15  
16 165 via the Alberta Continuing Care Information System (ACCIS), which contains information on admissions  
17  
18 166 and discharges from long-term care facilities [23]. PHN validity will be assessed using the Alberta Health  
19  
20 167 Care Insurance Plan (AHCIP) Adjusted Population Registry, which contains records of all individuals  
21  
22 168 registered for healthcare insurance [23,24].  
23  
24

25 169 Individuals can have multiple laboratory tests over the course of their illness; therefore only the first positive  
26  
27 170 influenza test during the influenza season will be used, and potential control samples will be selected from  
28  
29 171 among those who only tested negative for influenza during that influenza season, using the first negative test.  
30  
31 172 Cases and controls tested <14 days after vaccination will be excluded from the analysis.  
32  
33

34 173 Influenza vaccination status will be determined from the Influenza Vaccination Registry. The registry  
35  
36 174 combines data from four databases that record influenza vaccination events (see below).  
37  
38

39 175 The following administrative data sets will be used in this study.  
40  
41

- 42 176 • Alberta Health Immunization and Adverse Reaction to Immunization system (Imm/ARI) contains  
43  
44 177 records of all publicly funded vaccines administered through public health, including influenza  
45  
46 178 vaccines administered at mass influenza vaccination clinics, public health clinics, and vaccinations  
47  
48 179 administered by public health nurses in long-term care facilities. Data submission is mandatory and  
49  
50 180 guidelines exist to support complete and accurate vaccination records with descriptions of each,  
51  
52 181 including notes [25,26].  
53  
54  
55  
56  
57  
58  
59  
60

- 1  
2  
3 182 • The Supplemental Enhanced Service Event (SESE) database captures physician claims for billing  
4  
5 183 purposes; International Classification of Diseases, Ninth Revision (ICD-9) diagnosis codes,  
6  
7 184 procedure codes (Canadian Classification of Procedures), codes indicating location of service  
8  
9 185 delivery, and a number of other administrative elements used to support the payment for each  
10  
11 186 patient encounter [24,27,28].
- 13  
14 187 • Alberta Blue Cross (ABC) administers the pharmacist component of the universal vaccination  
15  
16 188 program. Pharmacists administering influenza vaccines through this program submit claims to ABC  
17  
18 189 for each vaccine provided; they are required to submit patient information such as PHN, date of  
19  
20 190 service, name, and address.
- 21  
22 191 • The Pharmaceutical Information Network (PIN) database records dispensed pharmacological  
23  
24 192 products, regardless of payer, including the rare instances when an influenza vaccine is purchased  
25  
26 193 rather than administered through the public program (e.g. purchased by travelers prior to the launch  
27  
28 194 of the public campaign). PIN captures approximately 95% of all dispensed events in the province  
29  
30 195 [23].
- 31  
32 196 • Provincial Vaccine Registry combines influenza vaccinations given in the province and recorded in  
33  
34 197 four source databases (PIN, ABC, SESE and Imm/ARI).
- 35  
36 198 • Alberta Health Care Insurance Plan (AHCIP) Population Registry contains demographic variables,  
37  
38 199 age, sex, socio-economic status, and geographic zone of residence. Neighbourhood-level socio-  
39  
40 200 economic status is derived from census dissemination area income quintiles using postal code.
- 41  
42 201 • Morbidity and Ambulatory Care Abstracting Reporting (MACAR) system contains ICD-10-CA  
43  
44 202 diagnostic codes, procedure codes, the date of admission, and date of discharge for every visit to  
45  
46 203 hospitals, emergency rooms, and outpatient clinics.

47  
48  
49  
50 204 The quality of administrative datasets in Alberta has been extensively reviewed [29–31].

51  
52  
53 205 Individuals will be considered inpatients if they have at least one physician claim for inpatient services on  
54  
55 206 the same day as specimen collection or if specimen collection occurred during an inpatient stay; all others

1  
2  
3 207 will be considered outpatients. Individuals with an immunocompromising condition will be defined as  
4  
5 208 those who have a diagnosis of HIV, who received an organ transplant, or received oral corticosteroids  
6  
7 209 (for  $\geq 30$  days), antineoplastic agents, or another immunocompromising drug from a community  
8  
9 210 pharmacist in the past 6 months. (Appendix 1 and 2) [32]. HIV diagnosis and ARI will be determined  
10  
11 211 through physician claims and MACAR. Organ transplantation will be determined using MACAR, and  
12  
13 212 immunocompromising drug dispensations will be identified through PIN.

### 16 213 **Statistical Analysis**

17  
18  
19 214 We will use multivariable logistic regression to estimate influenza vaccine effectiveness as  $(1 - \text{adjusted OR}) \times$   
20  
21 215 100%. We will estimate VE separately by influenza season and influenza subtype (i.e., A(H3N2),  
22  
23 216 A(H1N1)pdm09, and influenza B) [33]. When there is a large enough sample size in a particular season to  
24  
25 217 provide adequate power, VE will be estimated for specific age groups such as children under the age of 5 and  
26  
27 218 seniors over the age of 65. The following covariates will be included in the adjusted model, regardless of  
28  
29 219 statistical significance: age, sex, socio-economic status, geographic zone of residence, history of  
30  
31 220 immunocompromising comorbidities, healthcare setting (inpatient or outpatient setting), and month of  
32  
33 221 specimen submission within the influenza season. SAS version 9.4 will be used for all statistical analysis (SAS  
34  
35 222 Institute Inc, Cary, NC). VE estimates will be compared to published estimates of VE [6,7,11,13,34,35].  
36  
37  
38 223 As shedding of influenza virus continues for approximately 4-5 days after symptom onset, bias can result if  
39  
40 224 specimens that are collected too long after symptom onset are used [36]. Most studies use a threshold of 7  
41  
42 225 days [37]. To test the robustness of the findings, a sensitivity analysis will be performed; controls will be  
43  
44 226 restricted to those specimens positive for a different respiratory virus (i.e. coronavirus, human respiratory  
45  
46 227 syncytial virus) (As suggested by Sullivan et al 2016).

47  
48  
49  
50 228 A potential limitation to this study is that the samples utilized here are clinical isolates taken through the  
51  
52 229 course of normal patient care, and are not from a standard case definition as is utilized in some other studies  
53  
54 230 [12]. To test the robustness of the findings, the analysis will be repeated using only cases and controls that

1  
2  
3 231 were given a diagnosis code for ARI on the same day as specimen collection, as per the SESE database or  
4  
5 232 MACAR. Appendix 3 lists the ICD-9 and ICD-10 codes used to define ARIs.  
6  
7

8 233  
9

## 10 234 **PATIENT AND PUBLIC INVOLVEMENT**

11  
12  
13  
14 235 Patients and the public were not involved in the design of the study, including the development of the  
15  
16 236 research question, outcomes measures, recruitment to or conduct of the study. The results of the study will  
17  
18 237 be disseminated to the public as deemed appropriate by public health officials.  
19  
20

21 238  
22

## 23 239 **DISCUSSION**

24  
25  
26 240 This protocol describes the estimation of seasonal influenza VE using specimens collected for routine  
27  
28 241 influenza diagnostics as well as administrative data and vaccination records.  
29

30  
31 242 A key strength of this approach is the large sample size. This approach allows calculation of near real-time,  
32  
33 243 precise influenza VE estimates weeks prior to the influenza season peak, creating an early warning system for  
34  
35 244 public health if, as in the 2014-2015 season, the vaccine is found to have exceedingly low effectiveness. Early  
36  
37 245 notification of VE can assist public health in determining policies, messaging, and allocation of resources  
38  
39 246 (antiviral agents, staffing emergency departments) to counter a potentially more severe influenza season  
40  
41 247 [37,38]. The large sample size also allows for stratified analyses of VE based on product, age group, or region.  
42  
43

44 248 Whereas sentinel physician networks rely primarily on self-reported measures of influenza vaccination [34], a  
45  
46 249 significant strength of this study is the use of the near-real-time influenza vaccination registry that contains  
47  
48 250 individual-level, linkable data for most influenza vaccinations administered in the province. Use of this  
49  
50 251 registry reduces the likelihood of recall error and information biases such as social desirability bias and  
51  
52 252 reduces non-differential misclassification, which would bias the odds ratio towards the null, thus  
53  
54 253 underestimating VE [12].  
55  
56  
57  
58  
59  
60

1  
2  
3 254 Finally, we are certain to capture the results of all respiratory virus testing in the province, as all respiratory  
4  
5 255 virus testing is centralized at ProvLab and there is limited use of point-of-care testing.  
6  
7

8 256 There are some limitations to this methodology compared to the traditional method of VE estimation using  
9  
10 257 sentinel physician networks, because a standardized clinical case definition cannot be applied to determine  
11  
12 258 study eligibility. A sensitivity analysis restricting to healthcare encounters with a diagnosis code for ARI will  
13  
14 259 be used as a proxy for a standard case definition.  
15  
16

17 260 While the inclusion of confounders is important for VE estimate adjustment, not all known confounders can  
18  
19 261 be measured using administrative data. Frailty has been demonstrated to be a potential confounder of VE  
20  
21 262 [39–41]. Frailty cannot be included in the multivariable model because no validated indices of frailty  
22  
23 263 generated from standard administrative data exist at this time. However, this may not affect the results  
24  
25 264 significantly as a previous study indicated that inclusion of frailty in the multivariate model increased VE  
26  
27 265 estimates only slightly [42].  
28  
29

30 266 Laboratory requisitions in Alberta do not contain illness onset date. Ideally this would be used to ensure that  
31  
32 267 the negative laboratory test results were representative of an acute infectious period and that test-negative  
33  
34 268 specimens were not collected after viral shedding had ceased. Sullivan et al 2016 have indicated this bias may  
35  
36 269 be accounted for by selecting influenza test-negative controls that were positive for another respiratory virus.  
37  
38 270 Requiring controls to be positive for another virus excludes individuals who are tested long after their acute  
39  
40 271 infectious period. However, a recent systematic review found no differences when using different groups of  
41  
42 272 controls [43].  
43  
44

45 273 Comparison of the VE results using administrative data to previously published studies, specifically sentinel  
46  
47 274 surveillance for the same seasons (2011/12 – 2018/19) will help to identify further areas of refinement.  
48  
49 275 This approach could successfully allow for the generation of early influenza VE estimates which could  
50  
51 276 facilitate tailoring of public health messaging and assist in public health operations planning for the peak of  
52  
53 277 the influenza season.  
54  
55

56 278  
57  
58  
59  
60

1  
2  
3 **279 ETHICS**  
4

5 **280** Ethics approval was obtained from the University of Alberta's Health Research Ethics Board – Health Panel  
6  
7 **281** under study ID Pro00075997.  
8

9 **282**

10  
11 **283 LIST OF ABBREVIATIONS**  
12

13 **284** ABC – Alberta Blue Cross  
14

15 **285** ACCIS – Alberta Continuing Care Information System  
16

17 **286** AHCIP – Alberta Health Care Insurance Plan Adjusted Population Registry  
18

19 **287** CCI – Canadian Classification of Health Interventions  
20

21 **288** CCP – Canadian Classification of Diagnostic, Therapeutic, and Surgical Procedures  
22

23 **289** ICD-9 – International Classification of Diseases, Ninth Revision  
24

25 **290** ICD-10 – International Classification of Diseases, Tenth Revision  
26

27 **291** Imm/ARI – Alberta Health Immunization and Adverse Reaction to Immunization system  
28

29 **292** MACAR – Morbidity and Ambulatory Care Abstracting Reporting  
30

31 **293** PHN – Personal Health Number  
32

33 **294** PIN – Pharmaceutical Information Network  
34

35 **295** ProvLab – Alberta Provincial Laboratory for Public Health  
36

37 **296** RT-PCR – Reverse Transcriptase Polymerase Chain Reaction  
38

39 **297** SESE – Supplemental Enhance Service Event  
40

41 **298** VE – Vaccine Effectiveness  
42

43 **299**  
44  
45

46 **300 ETHICS APPROVAL AND CONSENT TO PARTICIPATE**  
47

48 **301** Ethics approval was obtained from the University of Alberta's Health Research Ethics Board – Health Panel  
49  
50 **302** under study ID Pro00075997.  
51

52 **303**  
53

54 **304 CONSENT FOR PUBLICATION**  
55  
56  
57  
58  
59  
60

1  
2  
3 305 Not applicable  
4  
5

6 306  
7

8  
9 307 **AVAILABILITY OF DATA AND MATERIALS**

10  
11 308 Not applicable  
12

13  
14 309

15  
16 310 **COMPETING INTERESTS**

17  
18 311 The authors declare that they have no competing interests.  
19

20  
21 312

22  
23 313 **FUNDING**

24  
25 314 Not applicable  
26

27 315

28  
29 316 **AUTHOR STATEMENT**

30  
31 317 ANS and SJD conceived of and designed the protocol and drafted and revised the manuscript. KS and LS  
32 318 planned the original approach, providing guidance on available administrative database resources. SAB and  
33 319 JCK made substantial contributions to the design and critically revised the manuscript.  
34

35  
36 320

37  
38 321

39  
40 322 **ACKNOWLEDGEMENTS**

41  
42 323 The authors would like to acknowledge the staff at Alberta Health Services and ProvLab for their assistance  
43 324 in providing administrative and laboratory data sources that could be implemented in this protocol.  
44

45 325 **LICENCE STATEMENT**

46  
47 326 \* I, the Submitting Author has the right to grant and does grant on behalf of all authors of the Work (as  
48 327 defined in the below author licence), an exclusive licence and/or a non-exclusive licence for  
49 328 contributions from authors who are: i) UK Crown employees; ii) where BMJ has agreed a CC-BY licence  
50 329 shall apply, and/or iii) in accordance with the terms applicable for US Federal Government officers or  
51 330 employees acting as part of their official duties; on a worldwide, perpetual, irrevocable, royalty-free  
52 331 basis to BMJ Publishing Group Ltd ("BMJ") its licensees and where the relevant Journal is co-owned by  
53 332 BMJ to the co-owners of the Journal, to publish the Work in BMJ Open and any other BMJ products and  
54  
55  
56  
57  
58  
59  
60



1  
2  
3 333 to exploit all rights, as set out in our [licence](#).  
4 334

5  
6 335 The Submitting Author accepts and understands that any supply made under these terms is made by  
7 336 BMJ to the Submitting Author unless you are acting as an employee on behalf of your employer or a  
8 337 postgraduate student of an affiliated institution which is paying any applicable article publishing charge  
9 338 (“APC”) for Open Access articles. Where the Submitting Author wishes to make the Work available on an  
10 339 Open Access basis (and intends to pay the relevant APC), the terms of reuse of such Open Access shall  
11 340 be governed by a Creative Commons licence – details of these licences and which [Creative Commons](#)  
12 341 licence will apply to this Work are set out in our licence referred to above.  
13  
14  
15  
16  
17  
18  
19  
20  
21  
22  
23  
24  
25  
26  
27  
28  
29  
30  
31  
32  
33  
34  
35  
36  
37  
38  
39  
40  
41  
42  
43  
44  
45  
46  
47  
48  
49  
50  
51  
52  
53  
54  
55  
56  
57  
58  
59  
60

## 342 REFERENCES

- 343 1 Mertz D, Tae HK, Johnstone J, *et al*. Populations at risk for severe or complicated influenza illness:  
344 systematic review and meta-analysis. *BMJ* 2013;**347**:10.
- 345 2 Alberta Health Services. Alberta Health Services. 2017.
- 346 3 Wong S-S, Webby RJ. Traditional and new influenza vaccines. *Clin Microbiol Rev* 2013;**26**:476–92.  
347 doi:10.1128/CMR.00097-12
- 348 4 Skowronski DM, Chambers C, Sabaiduc S, *et al*. A Perfect Storm: Impact of Genomic Variation and  
349 Serial Vaccination on Low Influenza Vaccine Effectiveness During the 2014-2015 Season. *Clin Infect*  
350 *Dis An Off Publ Infect Dis Soc Am* 2016;**63**:21–32. doi:10.1093/cid/ciw176
- 351 5 World Health Organization. Influenza Update N ° 309. 2018;**2018**:1–8.
- 352 6 Skowronski DM, De Serres G, Crowcroft NS, *et al*. Association between the 2008-09 seasonal  
353 influenza vaccine and pandemic H1N1 illness during Spring-Summer 2009: four observational studies  
354 from Canada. *PLoS Med* 2010;**e1000258**. doi:10.1371/journal.pmed.1000258
- 355 7 Chambers C, Skowronski DM, Sabaiduc S, *et al*. Interim estimates of 2015/16 vaccine effectiveness  
356 against influenza A(H1N1)pdm09, Canada, February 2016. *Euro Surveill Bull Eur Sur Les Mal Transm =*  
357 *Eur Commun Dis Bull* 2016;**21**:30168. doi:10.2807/1560-7917.ES.2016.21.11.30168
- 358 8 Kwong JC, Campitelli MA, Gubbay JB, *et al*. Vaccine effectiveness against laboratory-confirmed  
359 influenza hospitalizations among elderly adults during the 2010-2011 season. *Clin Infect Dis An Off Publ*  
360 *Infect Dis Soc Am* 2013;**57**:820–7. doi:10.1093/cid/cit404
- 361 9 Orenstein WA, Bernier RH, Dondero TJ, *et al*. Field evaluation of vaccine efficacy. *Bull World Health*  
362 *Organ* 1985;**63**:1055–68.
- 363 10 Public Health Agency of Canada. Effectiveness of Vaccine Against Medical Consultation Due to  
364 Laboratory-Confirmed Influenza: Results From a Sentinel Physician Pilot Project in British Columbia,  
365 2004-2005. *Can Commun Dis Rep* 2005;**31**:181–91.
- 366 11 Skowronski DM, Chambers C, Sabaiduc S, *et al*. Interim estimates of 2016/17 vaccine effectiveness  
367 against influenza A(H3N2), Canada, January 2017. *Euro Surveill Bull Eur Sur Les Mal Transm = Eur*  
368 *Commun Dis Bull* 2017;**22**. doi:10.2807/1560-7917.ES.2017.22.6.30460
- 369 12 World Health Organization (WHO). Evaluation of influenza vaccine effectiveness: A guide to the  
370 design and interpretation of observational studies. 2017;**1**:1–47.
- 371 13 Belongia EA, Simpson MD, King JP, *et al*. Variable influenza vaccine effectiveness by subtype: a  
372 systematic review and meta-analysis of test-negative design studies. *Lancet Infectious Dis* 2016;**16**:942–51.  
373 doi:10.1016/S1473-3099(16)00129-8
- 374 14 Kwong JC, Buchan SA, Chung H, *et al*. Can routinely collected laboratory and health administrative  
375 data be used to assess influenza vaccine effectiveness? Assessing the validity of the Flu and Other  
376 Respiratory Viruses Research (FOREVER) Cohort. *Vaccine* Published Online First: 17 June 2019.  
377 doi:10.1016/j.vaccine.2019.06.011
- 378 15 Fathima S, Simmonds K, Invik J, *et al*. Use of laboratory and administrative data to understand the  
379 potential impact of human parainfluenza virus 4 on cases of bronchiolitis, croup, and pneumonia in  
380 Alberta, Canada. *BMC Infect Dis* 2016;**16**. doi:10.1186/s12879-016-1748-z

- 1  
2  
3 381 16 Government of Alberta. Alberta Health: History of immunization in Alberta. 2017.  
4  
5 382 17 Pabbaraju K, Tokaryk KL, Wong S, *et al*. Comparison of the luminex xTAG respiratory viral panel  
6 383 with in-house nucleic acid amplification tests for diagnosis of respiratory virus infections. *J Clin*  
7 384 *Microbiol* 2008;**46**:3056–62. doi:10.1128/JCM.00878-08  
8  
9 385 18 Pabbaraju K, Wong S, Wong AA, *et al*. Design and validation of real-time reverse transcription-PCR  
10 386 assays for detection of pandemic (H1N1) 2009 virus. *J Clin Microbiol* 2009;**47**:3454–60.  
11 387 doi:10.1128/JCM.01103-09  
12  
13 388 19 Chaudhry A, Bastien N, Li Y, *et al*. Oseltamivir resistance in an influenza A (H3N2) virus isolated  
14 389 from an immunocompromised patient during the 2014-2015 influenza season in Alberta, Canada.  
15 390 *Influenza Other Respi Viruses* 2016;**10**:532–5. doi:10.1111/irv.12415  
16  
17 391 20 World Health Organization. Global epidemiological surveillance standards for influenza. 2013.  
18  
19 392 21 World Health Organization. A Manual for Estimating Disease Burden Associated with Seasonal  
20 393 Influenza. 2015.  
21  
22 394 22 Alberta Health. Alberta Health Seasonal Influenza in Alberta 2016/2017 Summary Report. 2017.  
23  
24 395 23 Government of Alberta. Overview of Administrative Health Datasets. 2017.  
25  
26 396 24 Russell ML, Schopflocher DP, Svenson L, *et al*. Secular trends in the epidemiology of shingles in  
27 397 Alberta. *Epidemiol Infect* 2007;**135**:908–13.  
28  
29 398 25 Government of Alberta. Immunization data submission and response guidelines. 2017.  
30  
31 399 26 MacDonald SE, Dover DC, Simmonds KA, *et al*. Risk of febrile seizures after first dose of measles-  
32 400 mumps-rubella- varicella vaccine: A population-based cohort study. *CMAJ* 2014;**186**:824–9.  
33 401 doi:10.1503/cmaj.140078  
34  
35 402 27 Alberta Health. Alberta Health Claims Assessment.  
36 403 2017. <https://open.alberta.ca/publications/alberta-health-diagnostic-codes> (accessed 23 Feb 2018).  
37  
38 404 28 Lix LM, Walker R, Quan H, *et al*. Features of physician services databases in Canada. *Chronic Dis Inj*  
39 405 *Can* 2012;**32**:186–93.  
40  
41 406 29 Hinds A, Lix LM, Smith M, *et al*. Quality of administrative health databases in Canada: a scoping  
42 407 review. *Can J Public Heal* 2016;**107**:e56--e61.  
43  
44 408 30 Shiff NJ, Jama S, Boden C, *et al*. Validation of administrative health data for the pediatric population:  
45 409 A scoping review. *BMC Health Serv Res* 2014;**14**. doi:10.1186/1472-6963-14-236  
46  
47 410 31 Quan H, Smith M, Bartlett-Esquilant G, *et al*. Mining Administrative Health Databases to Advance  
48 411 Medical Science: Geographical Considerations and Untapped Potential in Canada. *Can J Cardiol*  
49 412 2012;**28**:152–4. doi:10.1016/j.cjca.2012.01.005  
50  
51 413 32 Schwartz KL, Jembere N, Campitelli MA, *et al*. Using physician billing claims from the Ontario Health  
52 414 Insurance Plan to determine individual influenza vaccination status: an updated validation study. *C*  
53 415 *Open* 2016;**4**:E470.  
54  
55 416 33 Sullivan SG, Cowling BJ. ‘Crude Vaccine Effectiveness’ Is a Misleading Term in Test-negative Studies  
56 417 of Influenza Vaccine Effectiveness. *Epidemiology* 2015;**26**:e60. doi:10.1097/EDE.0000000000000343  
57  
58  
59  
60

- 1  
2  
3 418 34 Skowronski DM, Janjua NZ, De Serres G, *et al.* Low 2012-13 influenza vaccine effectiveness  
4 419 associated with mutation in the egg-adapted H3N2 vaccine strain not antigenic drift in circulating  
5 420 viruses. *PLoS One* 2014;**9**:e92153. doi:10.1371/journal.pone.0092153  
6  
7 421 35 Skowronski DM, Chambers C, Sabaiduc S, *et al.* Interim estimates of 2013/14 vaccine effectiveness  
8 422 against influenza A(H1N1)PDM09 from Canada's sentinel surveillance network, January 2014.  
9 423 *Eurosurveillance* 2014;**19**.  
10  
11 424 36 Sullivan SG, Tchetgen Tchetgen J. E, Cowling BJ. Theoretical Basis of the Test-Negative Study  
12 425 Design for Assessment of Influenza Vaccine Effectiveness. *Am J Epidemiol* 2016;**184**:345–53.  
13 426 doi:10.1093/aje/kww064  
14  
15 427 37 Orton L, Lloyd-Williams F, Taylor-Robinson D, *et al.* The use of research evidence in public health  
16 428 decision making processes: systematic review. *PLoS One*;e21704. doi:10.1371/journal.pone.0021704  
17  
18 429 38 Savel TG, Foldy S. The role of public health informatics in enhancing public health surveillance.  
19 430 *MMWR Suppl* 2012;**61**:20–4.  
20  
21 431 39 Nelson JC, Jackson ML, Weiss NS, *et al.* New strategies are needed to improve the accuracy of  
22 432 influenza vaccine effectiveness estimates among seniors. *J Clin Epidemiol* 2009;**62**:687–94.  
23 433 doi:10.1016/j.jclinepi.2008.06.014  
24  
25 434 40 Jackson LA, Jackson ML, Nelson JC, *et al.* Evidence of bias in estimates of influenza vaccine  
26 435 effectiveness in seniors. *Int J Epidemiol* 2006;**35**:337–  
27 436 44.[http://login.ezproxy.library.ualberta.ca/login?url=https://search.ebscohost.com/login.aspx?direct](http://login.ezproxy.library.ualberta.ca/login?url=https://search.ebscohost.com/login.aspx?direct=true&db=cmedm&AN=16368725&site=eds-live&scope=site)  
28 437 [=true&db=cmedm&AN=16368725&site=eds-live&scope=site](http://login.ezproxy.library.ualberta.ca/login?url=https://search.ebscohost.com/login.aspx?direct=true&db=cmedm&AN=16368725&site=eds-live&scope=site)  
29  
30 438 41 Jackson LA, Nelson JC, Benson P, *et al.* Functional status is a confounder of the association of  
31 439 influenza vaccine and risk of all cause mortality in seniors. *Int J Epidemiol* 2006;**35**:345–52.  
32  
33 440 42 Talbot HK, Nian H, Chen Q, *et al.* Evaluating the case-positive, control test-negative study design for  
34 441 influenza vaccine effectiveness for the frailty bias. *Vaccine* 2016;**34**:1806–9.  
35 442 doi:10.1016/j.vaccine.2016.02.037  
36  
37 443 43 Feng S, Cowling BJ, Kelly H, *et al.* Estimating Influenza Vaccine Effectiveness With the Test-  
38 444 Negative Design Using Alternative Control Groups: A Systematic Review and Meta-Analysis. *Am J*  
39 445 *Epidemiol* 2018;**187**:389–97. doi:10.1093/aje/kwx251  
40 446  
41  
42  
43  
44  
45  
46  
47  
48  
49  
50  
51  
52  
53  
54  
55  
56  
57  
58  
59  
60

Supplementary File - Using population-wide administrative and laboratory data to estimate type- and subtype-specific influenza vaccine effectiveness: a surveillance protocol

Appendix: List of CCP, CCI, and CMG codes utilized to define individuals who have had an organ transplant

**CCP Code Description**

|     |                                     |
|-----|-------------------------------------|
| 495 | Heart Transplantation               |
| 455 | Lung Transplant                     |
| 456 | Combined Heart-Lung Transplantation |
| 624 | Liver Transplant                    |
| 675 | Transplant of Kidney                |
| 648 | Transplant of Pancreas              |

**CCI Code Description**

|       |                                       |
|-------|---------------------------------------|
| 1HY85 | Transplant, Heart With Lung(S)        |
| 1HZ85 | Transplant, Heart Nec                 |
| 1GT85 | Transplant, Lung Nec                  |
| 1GR85 | Transplant, Lobe of Lung              |
| 1OA85 | Transplant, Liver                     |
| 1PC85 | Transplant, Kidney                    |
| 1OJ85 | Transplant, Pancreas                  |
| 1OK85 | Transplant, Pancreas With Duodenum    |
| 1NK85 | Transplant, Small Intestine           |
| 1NP85 | Transplant, Small And Large Intestine |

**CMG 1992 To 2005**

|     |                                        |
|-----|----------------------------------------|
| 175 | Heart or Lung Transplant               |
| 253 | Major Intestinal And Rectal Procedures |
| 310 | Liver Transplant                       |
| 311 | Major Pancreatic Procedures            |
| 500 | Kidney Transplant                      |

**CMG 2007 To 2016**

|     |                                                      |
|-----|------------------------------------------------------|
| 110 | Lung Transplant                                      |
| 160 | Heart Transplant                                     |
| 220 | Major Upper Gastrointestinal Reconstruction/Excision |
| 270 | Liver/Pancreas/Duodenum Transplant                   |
| 450 | Kidney Transplant                                    |

1  
2  
3 **Appendix: List of drug names and DINs utilized to define immunocompromising conditions**  
4  
5

| DIN      | Drug Name                       | Route of Administration | Strength |
|----------|---------------------------------|-------------------------|----------|
| 00616192 | ETOPOSIDE                       | CAP                     | 50MG     |
| 00523410 | ETOPOSIDE                       | IV SOL                  | 20MG/ML  |
| 02080036 | ETOPOSIDE                       | IV SOL                  | 20MG/ML  |
| 02241182 | ETOPOSIDE                       | IV SOL                  | 20MG/ML  |
| 02231622 | IRINOTECAN HCL                  | IV SOL                  | 20MG/ML  |
| 02258218 | IRINOTECAN HCL                  | IV SOL                  | 20MG/ML  |
| 00015431 | VINBLASTINE SULFATE             | IV PWS                  | 1MG/ML   |
| 00611182 | VINCRISTINE SULFATE             | IV SOL                  | 1MG/ML   |
| 02143305 | VINCRISTINE SULFATE             | IV SOL                  | 1MG/ML   |
| 00004618 | BUSULFAN                        | TAB                     | 2MG      |
| 00297763 | CARMUSTINE                      | IV PWS                  | 100MG    |
| 09851399 | CARMUSTINE                      | TOP SOL                 | NOT AVLE |
| 00004626 | CHLORAMBUCIL                    | TAB                     | 2MG      |
| 00344915 | CYCLOPHOSPHAMIDE                | INJ PWS                 | 2GM      |
| 00013544 | CYCLOPHOSPHAMIDE                | IV PWS                  | 200MG    |
| 00013552 | CYCLOPHOSPHAMIDE                | IV PWS                  | 200MG    |
| 02241797 | CYCLOPHOSPHAMIDE                | IV PWS                  | 200MG    |
| 02241799 | CYCLOPHOSPHAMIDE                | IV PWS                  | 1000MG   |
| 00013749 | CYCLOPHOSPHAMIDE                | TAB                     | 50MG     |
| 00262676 | CYCLOPHOSPHAMIDE                | TAB                     | 25MG     |
| 00344877 | CYCLOPHOSPHAMIDE                | TAB                     | 25MG     |
| 00344885 | CYCLOPHOSPHAMIDE                | TAB                     | 50MG     |
| 02241795 | CYCLOPHOSPHAMIDE                | TAB                     | 25MG     |
| 02241796 | CYCLOPHOSPHAMIDE                | TAB                     | 50MG     |
| 02063794 | ESTRAMUSTINE DISODIUM PHOSPHATE | CAP                     | 140MG    |
| 00780278 | ESTRAMUSTINE PHOSPHATE          | CAP                     | 140MG    |
| 00360414 | LOMUSTINE                       | CAP                     | 100MG    |
| 00360422 | LOMUSTINE                       | CAP                     | 40MG     |
| 00360430 | LOMUSTINE                       | CAP                     | 10MG     |
| 00016063 | MECHLORETHAMINE                 | IV PWS                  | 10MG     |
| 00004715 | MELPHALAN                       | TAB                     | 2MG      |
| 02312794 | TEMOZOLOMIDE                    | CAP                     | 140MG    |
| 02312816 | TEMOZOLOMIDE                    | CAP                     | 180MG    |
| 02395274 | TEMOZOLOMIDE                    | CAP                     | 20MG     |
| 02395282 | TEMOZOLOMIDE                    | CAP                     | 100MG    |
| 02395290 | TEMOZOLOMIDE                    | CAP                     | 140MG    |
| 02395312 | TEMOZOLOMIDE                    | CAP                     | 250MG    |
| 02443473 | TEMOZOLOMIDE                    | CAP                     | 5MG      |
| 02443481 | TEMOZOLOMIDE                    | CAP                     | 20MG     |

| DIN      | Drug Name             | Route of Administration | Strength |
|----------|-----------------------|-------------------------|----------|
| 02443511 | TEMOZOLOMIDE          | CAP                     | 100MG    |
| 02443538 | TEMOZOLOMIDE          | CAP                     | 140MG    |
| 02443554 | TEMOZOLOMIDE          | CAP                     | 250MG    |
| 02241093 | TEMOZOLOMIDE          | CAP                     | 5MG      |
| 02241094 | TEMOZOLOMIDE          | CAP                     | 20MG     |
| 02241095 | TEMOZOLOMIDE          | CAP                     | 100MG    |
| 02241096 | TEMOZOLOMIDE          | CAP                     | 250MG    |
| 02441160 | TEMOZOLOMIDE          | CAPSULE                 | 5MG      |
| 00237035 | THIOTEPA              | INJ PWS                 | 15MG/ML  |
| 02421917 | CAPECITABINE          | FC TAB                  | 150MG    |
| 02421925 | CAPECITABINE          | FC TAB                  | 500MG    |
| 02426757 | CAPECITABINE          | FC TAB                  | 150MG    |
| 02426765 | CAPECITABINE          | FC TAB                  | 500MG    |
| 02400022 | CAPECITABINE          | TAB                     | 150MG    |
| 02400030 | CAPECITABINE          | TAB                     | 500MG    |
| 02238453 | CAPECITABINE          | TAB                     | 150MG    |
| 02238454 | CAPECITABINE          | TAB                     | 500MG    |
| 02022117 | CLADRIBINE            | IV SOL                  | 1MG      |
| 00194727 | CYTARABINE            | INJ PWS                 | 500MG    |
| 00386715 | CYTARABINE            | INJ PWS                 | 100MG    |
| 02167867 | CYTARABINE            | INJ PWS                 | 100MG    |
| 00646296 | CYTARABINE            | IV PWS                  | 1GM      |
| 00646318 | CYTARABINE            | IV PWS                  | 2GM      |
| 02246226 | FLUDARABINE PHOSPHATE | TAB                     | 10MG     |
| 00012882 | FLUOROURACIL          | IV SOL                  |          |
| 00330582 | FLUOROURACIL          | TOP CRM                 | 5%       |
| 00465283 | HYDROXYUREA           | CAP                     | 500MG    |
| 02242920 | HYDROXYUREA           | CAP                     | 500MG    |
| 02247937 | HYDROXYUREA           | CAP                     | 500MG    |
| 00004723 | MERCAPTOPYRINE        | TAB                     | 50MG     |
| 02415275 | MERCAPTOPYRINE        | TABLET                  | 50MG     |
| 09857520 | METHOTREXATE          | INJ SOL                 | 50MG/2ML |
| 02182777 | METHOTREXATE          | INJ SOL                 | 25MG/ML  |
| 02182955 | METHOTREXATE          | INJ SOL                 | 25MG/ML  |
| 00014915 | METHOTREXATE          | TAB                     | 2.5MG    |
| 02170698 | METHOTREXATE          | TAB                     | 2.5MG    |
| 02182750 | METHOTREXATE          | TAB                     | 10MG     |
| 02182963 | METHOTREXATE          | TAB                     | 2.5MG    |
| 02244798 | METHOTREXATE          | TAB                     | 2.5MG    |
| 02398427 | METHOTREXATE          | VIAL                    | 25MG/ML  |
| 00321397 | METHOTREXATE DISODIUM | INJ SOL                 | 2.5MG/ML |
| 00321400 | METHOTREXATE DISODIUM | INJ SOL                 | 2.5MG/ML |

1  
2  
3  
4  
5  
6  
7  
8  
9  
10  
11  
12  
13  
14  
15  
16  
17  
18  
19  
20  
21  
22  
23  
24  
25  
26  
27  
28  
29  
30  
31  
32  
33  
34  
35  
36  
37  
38  
39  
40  
41  
42  
43  
44  
45  
46  
47  
48  
49  
50  
51  
52  
53  
54  
55  
56  
57  
58  
59  
60

| DIN      | Drug Name              | Route of Administration | Strength   |
|----------|------------------------|-------------------------|------------|
| 02170663 | METHOTREXATE DISODIUM  | INJ SOL                 | 50MG/2ML   |
| 02170671 | METHOTREXATE DISODIUM  | INJ SOL                 | 2.5MG/ML   |
| 02182947 | METHOTREXATE SODIUM    | INJ SOL                 | 10MG/ML    |
| 00614335 | METHOTREXATE SODIUM    | IV SOL                  | 10MG/ML    |
| 00874132 | METHOTREXATE SODIUM    | TAB                     | 2.5MG      |
| 02171767 | METHOTREXATE SODIUM    | TAB                     | 2.5MG      |
| 00282081 | THIOGUANINE            | TAB                     | 40MG       |
| 02384256 | CRIZOTINIB             | CAP                     | 200MG      |
| 02384264 | CRIZOTINIB             | CAP                     | 250MG      |
| 02409607 | DABRAFENIB             | CAP                     | 50MG       |
| 02409615 | DABRAFENIB             | CAP                     | 75MG       |
| 02320193 | DASATINIB              | TAB                     | 100MG      |
| 02293129 | DASATINIB              | TAB                     | 20MG       |
| 02293137 | DASATINIB              | TAB                     | 50MG       |
| 02293145 | DASATINIB              | TAB                     | 70MG       |
| 02269007 | ERLOTINIB HCL          | TAB                     | 25MG       |
| 02269015 | ERLOTINIB HCL          | TAB                     | 100MG      |
| 02269023 | ERLOTINIB HCL          | TAB                     | 150MG      |
| 02377705 | ERLOTINIB HCL          | TABLET                  | 100MG      |
| 02377713 | ERLOTINIB HCL          | TABLET                  | 150MG      |
| 02434407 | IBRUTINIB              | CAP                     | 140MG      |
| 09857447 | IMATINIB MESYLATE      | TAB                     | 100MG      |
| 02388006 | RUXOLITINIB            | TAB                     | 5MG        |
| 02388014 | RUXOLITINIB            | TAB                     | 15MG       |
| 02388022 | RUXOLITINIB            | TAB                     | 20MG       |
| 02409658 | TRAMETINIB RECOMBINANT | TAB                     | 2MG        |
| 01926438 | ASPARAGINASE           | INJ PWS                 | 10MU       |
| 02389649 | AXITINIB               | TAB                     | 5MG        |
| 02389630 | AXITINIB               | TAB FC                  | 1MG        |
| 02262452 | BORTEZOMIB             | IV PWS                  | 3.5MG      |
| 00521183 | DACARBAZINE            | IV PWS                  | 200MG/VIAL |
| 02154854 | DACARBAZINE            | IV PWS                  | 200MG      |
| 02248676 | GEFITINIB              | TAB                     | 250MG      |
| 02244725 | IMATINIB MESYLATE      | CAP                     | 100MG      |
| 02399806 | IMATINIB MESYLATE      | FC TAB                  | 100MG      |
| 02355337 | IMATINIB MESYLATE      | TAB                     | 100MG      |
| 02355345 | IMATINIB MESYLATE      | TAB                     | 400MG      |
| 02397285 | IMATINIB MESYLATE      | TAB                     | 100MG      |
| 02397293 | IMATINIB MESYLATE      | TAB                     | 400MG      |
| 02399814 | IMATINIB MESYLATE      | TAB                     | 400MG      |
| 02431114 | IMATINIB MESYLATE      | TAB                     | 100MG      |
| 02431122 | IMATINIB MESYLATE      | TAB                     | 400MG      |



| DIN      | Drug Name              | Route of Administration | Strength   |
|----------|------------------------|-------------------------|------------|
| 09857448 | IMATINIB MESYLATE      | TAB                     | 400MG      |
| 02253275 | IMATINIB MESYLATE      | TAB                     | 100MG      |
| 02253283 | IMATINIB MESYLATE      | TAB                     | 400MG      |
| 02326442 | LAPATINIB DITOSYLATE   | TAB                     | 250MG      |
| 02315874 | NILOTINIB              | CAP                     | 200MG      |
| 02368250 | NILOTINIB              | CAP                     | 150MG      |
| 02352303 | PAZOPANIB HCL          | TAB                     | 200MG      |
| 00012750 | PROCARBAZINE HCL       | CAP                     | 50MG       |
| 02403390 | REGORAFENIB            | TAB                     | 40MG       |
| 02284227 | SORAFENIB TOSYLATE     | TAB                     | 200MG      |
| 02280795 | SUNITINIB MALATE       | CAP                     | 12.5MG     |
| 02280809 | SUNITINIB MALATE       | CAP                     | 25MG       |
| 02280817 | SUNITINIB MALATE       | CAP                     | 50MG       |
| 02258595 | ADALIMUMAB             | INJ-SC SOL              | 40MG       |
| 09854785 | ADALIMUMAB             | INJ-SC SOL              | 40MG       |
| 09857294 | ADALIMUMAB             | INJ-SC SOL              | 40MG       |
| 09857326 | ADALIMUMAB             | INJ-SC SOL              | 40MG       |
| 09857327 | ADALIMUMAB             | INJ-SC SOL              | 40MG       |
| 02130181 | ALDESLEUKIN            | IV PWS                  | 1.3MG      |
| 02331675 | CERTOLIZUMAB PEGOL     | INJ-SC SOL              | 200MG/ML   |
| 09857394 | ETANERCEPT RECOMBINANT | INJ SOL                 | 50MG/ML    |
| 02242903 | ETANERCEPT RECOMBINANT | INJ-SC PWS              | 25MG       |
| 02274728 | ETANERCEPT RECOMBINANT | INJ-SC SOL              | 50MG/ML    |
| 09857322 | ETANERCEPT RECOMBINANT | INJ-SC SOL              | 50MG/ML    |
| 02233014 | GLATIRAMER             | INJ-SC PWS              | 20MG       |
| 02245619 | GLATIRAMER             | INJ-SC SOL              | 20MG/ML    |
| 02324776 | GOLIMUMAB RECOMBINANT  | INJ-SC SOL              | 50MG/0.5ML |
| 02324784 | GOLIMUMAB RECOMBINANT  | INJ-SC SOL              | 50MG/0.5ML |
| 02244016 | INFLIXIMAB             | IV PWS                  | 100MG      |
| 09852956 | INFLIXIMAB             | IV PWS                  | 100MG      |
| 02419475 | INFLIXIMAB             | PWD VIAL                | 100MG      |
| 02239832 | INTERFERON             | INJ-SC SOL              | 0.03MG/ML  |
| 09852751 | INTERFERON             | OPH SOL                 | 1MU/ML     |
| 02223384 | INTERFERON ALFA 2B     | INJ PWS                 | 3MMU       |
| 02223392 | INTERFERON ALFA 2B     | INJ PWS                 | 5MMU       |
| 02223406 | INTERFERON ALFA 2B     | INJ PWS                 | 10MMU      |
| 02231651 | INTERFERON ALFA 2B     | INJ PWS                 | 18MMU      |
| 00889067 | INTERFERON ALFA 2B     | INJ SOL                 | 10MMU/2ML  |
| 02223414 | INTERFERON ALFA 2B     | INJ SOL                 | 10MMU/2ML  |
| 02238674 | INTERFERON ALFA 2B     | INJ SOL                 | 3MMU/0.5ML |
| 02238675 | INTERFERON ALFA 2B     | INJ SOL                 | 5MMU/0.5ML |
| 09853995 | INTERFERON ALFA 2B     | INJ SOL                 | 10MU/VIAL  |

1  
2  
3  
4  
5  
6  
7  
8  
9  
10  
11  
12  
13  
14  
15  
16  
17  
18  
19  
20  
21  
22  
23  
24  
25  
26  
27  
28  
29  
30  
31  
32  
33  
34  
35  
36  
37  
38  
39  
40  
41  
42  
43  
44  
45  
46  
47  
48  
49  
50  
51  
52  
53  
54  
55  
56  
57  
58  
59  
60

| DIN      | Drug Name             | Route of Administration | Strength     |              |
|----------|-----------------------|-------------------------|--------------|--------------|
| 09854045 | INTERFERON ALFA 2B    | INJ SOL                 | 3MMU/0.5ML   |              |
| 09854053 | INTERFERON ALFA 2B    | INJ SOL                 | 5MMU/0.5ML   |              |
| 00705896 | INTERFERON ALFA 2B    | INJ-SC SOL              | 3MMU         |              |
| 00705918 | INTERFERON ALFA 2B    | INJ-SC SOL              | 5MMU         |              |
| 00705926 | INTERFERON ALFA 2B    | INJ-SC SOL              | 10MMU        |              |
| 02240693 | INTERFERON ALFA 2B    | INJ-SC SOL              | 18MMU/1.2ML  |              |
| 02240694 | INTERFERON ALFA 2B    | INJ-SC SOL              | 30MMU/1.2ML  |              |
| 02240695 | INTERFERON ALFA 2B    | INJ-SC SOL              | 60MMU/1.2ML  |              |
| 01911988 | INTERFERON ALFA-2A    | INJ PWS                 | 3000MU/ML    |              |
| 01911996 | INTERFERON ALFA-2A    | INJ PWS                 | 9000MU/ML    |              |
| 01912003 | INTERFERON ALFA-2A    | INJ PWS                 | 6000MU/ML    |              |
| 00812471 | INTERFERON ALFA-2A    | INJ PWS                 | 6000MU/ML    |              |
| 00812498 | INTERFERON ALFA-2A    | INJ SOL                 | 6000MU/ML    |              |
| 00812501 | INTERFERON ALFA-2A    | INJ SOL                 | 3000MU/ML    |              |
| 02217015 | INTERFERON ALFA-2A    | INJ SOL                 | 3000MU/ML    |              |
| 02217031 | INTERFERON ALFA-2A    | INJ SOL                 | 6000MU/ML    |              |
| 02217058 | INTERFERON ALFA-2A    | INJ SOL                 | 9000MU/ML    |              |
| 02217066 | INTERFERON ALFA-2A    | INJ SOL                 | 18000MU/ML   |              |
| 02019914 | INTERFERON ALFA-2A    | INJ SOL                 | 9000MU/ML    |              |
| 01959069 | INTERFERON ALPHA-N1   | INJ SOL                 | 10MU         |              |
| 01959077 | INTERFERON ALPHA-N1   | INJ SOL                 | 3MU          |              |
| 00709042 | INTERFERON ALPHA-N1   | INJ SOL                 | 3MU          |              |
| 00709050 | INTERFERON ALPHA-N1   | INJ SOL                 | 10MU         |              |
| 02169649 | INTERFERON BETA       | INJ-SC PWS              | 0.3MG        |              |
| 02237317 | INTERFERON BETA 1A    | INJ PWS                 | 11MCG        |              |
| 02237318 | INTERFERON BETA 1A    | INJ PWS                 | 44MCG        |              |
| 02237770 | INTERFERON BETA 1A    | INJ-IM PWS              | 30MCG/1.1ML  |              |
| 02269201 | INTERFERON BETA 1A    | INJ-IM SOL              | 30MCG/0.5ML  |              |
| 02318253 | INTERFERON BETA 1A    | INJ-SC SOL              | 66MCG/1.5ML  |              |
| 02318261 | INTERFERON BETA 1A    | INJ-SC SOL              | 132MCG/1.5ML |              |
| 02237319 | INTERFERON BETA 1A    | INJ-SC SOL              | 22MCG/0.5ML  |              |
| 02237320 | INTERFERON BETA 1A    | INJ-SC SOL              | 44MCG/0.5ML  |              |
| 09857395 | INTERFERON BETA-1A    | PREF AUTOINJ PEN        | 30MCG/0.5ML  |              |
| 02337819 | INTERFERON BETA-1B    | RECOMBINANT             | INJ-SC PWS   | 0.3MG        |
| 00846368 | LEVAMISOLE HCL        | TAB                     | 50MG         |              |
| 02234217 | LEVAMISOLE HCL        | TAB                     | 50MG         |              |
| 09857505 | PEGINTERFERON ALFA 2A | RECOMBINANT             | INJ-SC SOL   | 180MCG/0.5ML |
| 02248077 | PEGINTERFERON ALFA 2A | RECOMBINANT             | INJ-SC SOL   | 180MCG/0.5ML |
| 02248078 | PEGINTERFERON ALFA 2A | RECOMBINANT             | INJ-SC SOL   | 180MCG/ML    |

| DIN      | Drug Name         | Route of Administration | Strength |
|----------|-------------------|-------------------------|----------|
| 00258482 | BLEOMYCIN SULFATE | INJ PWS                 | 15U      |
| 00163899 | DAUNORUBICIN HCL  | INJ PD                  | 20MG     |
| 01926683 | DAUNORUBICIN HCL  | IV PWS                  | 20MG     |
| 00353078 | DOXORUBICIN HCL   | IV PWS                  | 50MG     |
| 00357391 | DOXORUBICIN HCL   | IV PWS                  | 10MG     |
| 00640050 | EPIRUBICIN HCL    | INJ PWS                 | 10MG     |
| 00640069 | EPIRUBICIN HCL    | IV PWS                  | 50MG     |
| 00381799 | MITOMYCIN         | IV PWS                  | 5MG      |
| 00463221 | MITOTANE          | TAB                     | 500MG    |
| 02415992 | AFLIBERCEPT       | VIAL                    | 40MG/ML  |
| 02273993 | ALEMTUZUMAB       | IV SOL                  | 10MG/ML  |
| 02290960 | ALEMTUZUMAB       | IV SOL                  | 30MG/ML  |
| 02270994 | BEVACIZUMAB       | IV SOL                  | 25MG/ML  |
| 09857407 | RITUXIMAB         | IV SOL                  | 10MG/ML  |
| 02241927 | RITUXIMAB         | IV SOL                  | 10MG/ML  |

**Appendix: ICD-9 codes and ICD-10 codes utilized to define acute respiratory illness in physician,  
ER and hospital encounters.**

| <b>Description</b>                                                     | <b>ICD-9 Code</b>           | <b>ICD-10 Code</b>         |
|------------------------------------------------------------------------|-----------------------------|----------------------------|
| Viral infection, unspecified site                                      | 079                         | B34                        |
| Viral agents as the cause of diseases<br>classified to other chapters  | --                          | B97 (but not B973 or B977) |
| Acute nasopharyngitis (common cold)                                    | 460                         | J00                        |
| Acute sinusitis                                                        | 461                         | J01                        |
| Acute pharyngitis                                                      | 462                         | J02                        |
| Acute tonsillitis                                                      | 463                         | J03                        |
| Acute laryngitis, tracheitis, epiglottitis,<br>croup                   | 464                         | J04, J05                   |
| Acute upper respiratory infections of<br>multiple or unspecified sites | 465                         | J06                        |
| Influenza due to identified novel<br>influenza A virus                 | 488                         | J09                        |
| Influenza                                                              | 487                         | J10, J11                   |
| Pneumonia, organism unspecified                                        | 486                         | --                         |
| Viral pneumonia                                                        | 480                         | J12                        |
| Bacterial pneumonia                                                    | 481, 482                    | J13, J14, J15              |
| Pneumonia due to other specified<br>organism                           | 483                         | J16                        |
| Pneumonia in infectious diseases<br>classified elsewhere               | 484                         | J17                        |
| Bronchopneumonia, organism<br>unspecified                              | 485                         | J18                        |
| Acute bronchitis and bronchiolitis                                     | 466                         | J20, J21                   |
| Unspecified diseases respiratory system                                | 519                         | J22, J39.8, J39.9          |
| Bronchitis, not specified as acute or<br>chronic                       | 490                         | J40                        |
| Acute respiratory distress syndrome                                    | 518.82                      | J80                        |
| Pulmonary edema                                                        | 518.4                       | J81                        |
| Pleural effusion                                                       | 510.9, 511.0, 511.1, 511.89 | J86.9, J90, R09.1          |
| Respiratory failure                                                    | 518.81                      | J96.0, J96.9               |
| Atelectasis                                                            | --                          | J98.10                     |
| Pulmonary collapse                                                     | 518.0                       | J98.19                     |
| Other respiratory disorders                                            | 786.00, 786.09              | J98.0, J98.4, J98.8, J98.9 |
| Hemoptysis                                                             | 786.30                      | R04.2                      |
| Cough                                                                  | 786.2                       | R05                        |
| Shortness of breath (dyspnea)                                          | 786.02, 786.05, 786.09      | R06.0                      |
| Stridor                                                                | 786.1                       | R06.1                      |
| Wheezing                                                               | 786.07                      | R06.2                      |
| Tachypnea                                                              | 786.06                      | R06.4                      |

| Description             | ICD-9 Code                                                   | ICD-10 Code  |
|-------------------------|--------------------------------------------------------------|--------------|
| Chest pain on breathing | 786.52                                                       | R07.1        |
| Hypoxemia               | 799.02                                                       | R09.0        |
| Respiratory arrest      | 799.1                                                        | R09.2        |
| Abnormal sputum         | 786.4                                                        | R09.3        |
| Nasal congestion        | 478.19                                                       | R09.81       |
| Abnormal chest sounds   | 786.7                                                        | R09.89       |
| Fever                   | 780.60                                                       | R50          |
| Chills (without fever)  | 780.64                                                       | R68.0        |
| Sepsis, shock           | 669.11, 669.12, 669.14,<br>785.50, 785.52, 995.91,<br>995.92 | A41.9, R57.9 |

For peer review only

# BMJ Open

## Using population-wide administrative and laboratory data to estimate type- and subtype-specific influenza vaccine effectiveness: a surveillance protocol

|                                 |                                                                                                                                                                                                                                                                                                                                                                                                                                                                                                                                                                                                                     |
|---------------------------------|---------------------------------------------------------------------------------------------------------------------------------------------------------------------------------------------------------------------------------------------------------------------------------------------------------------------------------------------------------------------------------------------------------------------------------------------------------------------------------------------------------------------------------------------------------------------------------------------------------------------|
| Journal:                        | <i>BMJ Open</i>                                                                                                                                                                                                                                                                                                                                                                                                                                                                                                                                                                                                     |
| Manuscript ID                   | bmjopen-2019-029708.R3                                                                                                                                                                                                                                                                                                                                                                                                                                                                                                                                                                                              |
| Article Type:                   | Protocol                                                                                                                                                                                                                                                                                                                                                                                                                                                                                                                                                                                                            |
| Date Submitted by the Author:   | 18-Jul-2019                                                                                                                                                                                                                                                                                                                                                                                                                                                                                                                                                                                                         |
| Complete List of Authors:       | Scott, Allison; Government of Alberta, Ministry of Health; PolicyWise for Children & Families<br>Buchan, Sarah; Institute for Clinical Evaluative Sciences; Public Health Ontario<br>Kwong, Jeff; Institute for Clinical Evaluative Sciences<br>Drews, Steven; Alberta Provincial Laboratory for Public Health; University of Alberta, Division of Preventive Medicine<br>Simmonds, Kimberley; Alberta Ministry of Health, Epidemiology and Surveillance<br>Svenson, Lawrence; Government of Alberta, Ministry of Health; University of Calgary Cumming School of Medicine, Department of Community Health Sciences |
| <b>Primary Subject Heading</b>: | Public health                                                                                                                                                                                                                                                                                                                                                                                                                                                                                                                                                                                                       |
| Secondary Subject Heading:      | Infectious diseases, Public health, Epidemiology                                                                                                                                                                                                                                                                                                                                                                                                                                                                                                                                                                    |
| Keywords:                       | Influenza, Vaccine effectiveness, Case Control, Test-negative, Administrative data, Population level                                                                                                                                                                                                                                                                                                                                                                                                                                                                                                                |
|                                 |                                                                                                                                                                                                                                                                                                                                                                                                                                                                                                                                                                                                                     |

SCHOLARONE™  
Manuscripts

1  
2  
3 1 **TITLE**

4  
5 2 **Using population-wide administrative and laboratory data to estimate type- and subtype-specific**  
6 3 **influenza vaccine effectiveness: a surveillance protocol**

7  
8 4 Allison N Scott<sup>1,2,3</sup>

9  
10 5 Sarah A Buchan<sup>4,5,6</sup>

11  
12 6 Jeffrey C Kwong<sup>4,5,6,7,8</sup>

13  
14 7 Steven J Drews<sup>9,10</sup>

15  
16 8 Kimberley A Simmonds<sup>1,11</sup>

17  
18 9 Lawrence W Svenson<sup>1,11, 12, 13</sup>

19  
20 10

21  
22 11 **Affiliations**

23  
24 12 <sup>1</sup>Ministry of Health, Government of Alberta, Edmonton, AB, Canada

25  
26 13 <sup>2</sup>PolicyWise for Children & Families, Edmonton, AB, Canada

27  
28 14 <sup>3</sup>Department of Public Health, Concordia University of Edmonton, AB, Canada

29  
30 15 <sup>4</sup>ICES, Toronto, ON, Canada

31  
32 16 <sup>5</sup>Public Health Ontario, Toronto, ON, Canada

33  
34 17 <sup>6</sup>Dalla Lana School of Public Health, University of Toronto, Toronto, ON, Canada

35  
36 18 <sup>7</sup>Department of Family & Community Medicine, University of Toronto, Toronto, ON, Canada

37  
38 19 <sup>8</sup>University Health Network, Toronto, ON, Canada

39  
40 20 <sup>9</sup>The Alberta Provincial Laboratory for Public Health, Edmonton, AB, Canada

41  
42 21 <sup>10</sup>Department of Laboratory Medicine & Pathology, University of Alberta, Edmonton, AB, Canada

43  
44 22 <sup>11</sup> Department of Community Health Sciences, Cumming School of Medicine, University of Calgary, Calgary,  
45 23 AB, Canada

46  
47 24 <sup>12</sup> School of Public Health, University of Alberta, Edmonton, AB, Canada

48  
49 25 <sup>13</sup> Division of Preventive Medicine, University of Alberta, Edmonton, AB, Canada

50  
51 26

52  
53 27 **Corresponding Author:**

54  
55 28 Allison N. Scott, Ph.D.

1  
2  
3 29 PolicyWise for Children & Families  
4  
5 30 1000, 9925-109 Street NW  
6  
7 31 Edmonton, Alberta, Canada T5K 2J8  
8

9 32

10  
11 33 **Email Addresses**

12  
13 34 Allison N Scott AScott@policywise.com  
14  
15 35 Sarah A Buchan Sarah.Buchan@oahpp.ca  
16  
17 36 Jeffrey C Kwong jeff.kwong@utoronto.ca  
18  
19 37 Steven J Drews steven.drews@blood.ca  
20  
21 38 Kimberley A Simmonds kimberley.simmonds@gov.ab.ca  
22  
23 39 Lawrence W Svenson larry.svenson@gov.ab.ca  
24

25 40

26  
27 41

28  
29 42 **Word Count:** 2,550  
30  
31  
32  
33  
34  
35  
36  
37  
38  
39  
40  
41  
42  
43  
44  
45  
46  
47  
48  
49  
50  
51  
52  
53  
54  
55  
56  
57  
58  
59  
60



1  
2  
3 **43 ABSTRACT**

4  
5 **44 Introduction**

6  
7 45 The appropriateness of using routinely collected laboratory data combined with administrative data for  
8  
9 46 estimating influenza vaccine effectiveness (VE) is still being explored. This paper outlines a protocol to  
10  
11 47 estimate influenza VE using linked laboratory and administrative data which could act as a companion to  
12  
13 48 estimates derived from other methods.

14  
15  
16 **49 Methods and Analysis**

17  
18 50 We will use the test-negative design to estimate VE for each influenza type/subtype and season. Province-  
19  
20 51 wide individual-level records of positive and negative influenza tests at the Provincial Laboratory for Public  
21  
22 52 Health in Alberta will be linked, by unique personal health numbers, to administrative databases and  
23  
24 53 vaccination records held at the Ministry of Health in Alberta to determine covariates and influenza  
25  
26 54 vaccination status, respectively. Covariates of interests include age, sex, immunocompromising chronic  
27  
28 55 conditions, and healthcare setting. Cases will be defined based on an individual's first positive influenza test  
29  
30 56 during the season, and potential controls will be defined based on an individual's first negative influenza test  
31  
32 57 during the season. One control for each case will be randomly selected based on the week the specimen was  
33  
34 58 collected. We will estimate vaccine effectiveness using multivariable logistic regression.

35  
36  
37 **59 Ethics and Dissemination**

38  
39 60 Ethics approval was obtained from the University of Alberta's Health Research Ethics Board – Health Panel  
40  
41 61 under study ID Pro00075997. Results will be disseminated by public health officials in Alberta.  
42  
43  
44  
45  
46  
47  
48  
49  
50  
51  
52  
53  
54  
55  
56  
57  
58  
59  
60

1  
2  
3 65 **Key Words**  
4

5 66 Influenza  
6

7 67 Vaccine effectiveness  
8

9 68 Case Control  
10

11 69 Test-negative  
12

13 70 Administrative data  
14

15 71 Population-level  
16

17 72 Laboratory data  
18

19 73 Vaccination database  
20

21 74  
22  
23  
24  
25  
26  
27  
28  
29  
30  
31  
32  
33  
34  
35  
36  
37  
38  
39  
40  
41  
42  
43  
44  
45  
46  
47  
48  
49  
50  
51  
52  
53  
54  
55  
56  
57  
58  
59  
60

For peer review only

1  
2  
3  
4  
5  
6  
7  
8  
9  
10  
11  
12  
13  
14  
15  
16  
17  
18  
19  
20  
21  
22  
23  
24  
25  
26  
27  
28  
29  
30  
31  
32  
33  
34  
35  
36  
37  
38  
39  
40  
41  
42  
43  
44  
45  
46  
47  
48  
49  
50  
51  
52  
53  
54  
55  
56  
57  
58  
59  
60

75 **ARTICLE SUMMARY**

76 **Strengths and limitations of this study**

- 77 • A strength of this protocol is that it provides timely estimation of vaccine effectiveness to assist  
78 public health in allocating resources and determining the appropriate policies and public messaging  
79 during the influenza season.
- 80 • Vaccine effectiveness estimates use a test negative design, taking advantage of linked administrative  
81 health records for the entire population.
- 82 • While many confounders are included in the vaccine effectiveness estimates, not all known  
83 confounders can be measured using administrative health data.

84

For peer review only

## 85 INTRODUCTION

86 Influenza is a respiratory viral disease associated with significant morbidity and mortality globally. Infections  
87 range from relatively mild presentations (e.g. cough, sore throat) to severe lower respiratory tract infections  
88 (e.g. pneumonia). Severe cases may be associated with hospitalization, intensive care admission, and death;  
89 young children, the elderly, and individuals with chronic conditions are at highest risk of severe outcomes[1].  
90 In Canada, rates of laboratory-confirmed influenza infections are, on average, approximately 200 cases per  
91 100,000 population, with approximately 50% of cases occurring in patients aged  $\leq 18$  years [2]. The causative  
92 agents, influenza A (subtypes H3N2 and H1N1pdm(09)) and influenza B (Yamagata and Victoria lineages),  
93 are under strong selective pressure to mutate genetically; significant genetic changes can occur in relatively  
94 short periods of time (i.e. <1 year) [3].

95 Influenza prevention relies, in part, on annual vaccination campaigns. Selection of viral strains for inclusion  
96 in the vaccine occurs approximately 9 months prior to the onset of the influenza season; by the time the  
97 vaccines are administered, the predominant circulating strains may have mutated to the point such that the  
98 effectiveness of the vaccine has diminished or has become completely ineffective [4,5].

99 Influenza VE is commonly estimated using the test-negative design, a variation of the case-control design  
100 where cases and controls are selected from a pool of individuals who have been tested for influenza [6–10].  
101 Several research groups use sentinel physician networks to recruit patients: influenza testing is performed on  
102 patients who meet a case definition for influenza-like illness, and cases and controls are selected from that  
103 pool [6–8]. While this has become an established method, there are some limitations to using sentinel  
104 physicians. As the physicians are often volunteers, there can be bias in the geographic distribution, leading to  
105 clustering of sampling in certain areas and not others. This can lead to inaccuracies as predominant  
106 circulating influenza strains vary geographically [7,11]. Immunization information is commonly self-reported,  
107 potentially leading to recall and social desirability biases [12]; volunteer physicians may be more likely to have  
108 strong views on influenza immunization, potentially making it more difficult for the patient to admit to not  
109 being immunized. Finally, as these studies are labour-intensive for clinic staff, physician recruitment is often

1  
2  
3 110 low, resulting in small sample sizes and wide confidence intervals. Estimates are, therefore, typically available  
4  
5 111 after the peak of the influenza season, decreasing their usefulness for public health messaging and resource  
6  
7 112 and operational planning [6–8,11].  
8  
9

10 113 Using administrative data and routinely collected clinical specimens for estimating VE is currently under  
11  
12 114 debate [13]. VE estimates generated using linked health administrative and laboratory data in the province  
13  
14 115 Ontario have been shown to be comparable to previously published estimates[14]. There has been one  
15  
16 116 published estimate of Alberta-specific vaccine effectiveness using a sentinel surveillance system[11]; however,  
17  
18 117 because of the small sample size the confidence interval was large, ranging from 8% to 72%. Estimating VE  
19  
20 118 in a large jurisdiction with near-real-time data on all influenza laboratory testing and influenza vaccination in  
21  
22 119 the population has the potential to provide more precise and timely VE estimates than has previously been  
23  
24 120 possible. We present a protocol to estimate influenza VE using individually-linked laboratory and  
25  
26 121 administrative data.  
27  
28

29  
30 122

## 31 32 123 **METHODS AND ANALYSIS**

### 33 34 35 124 **Study Setting:**

36  
37  
38 125 Alberta is a province in Canada with a publicly-funded universal health care system; each of the 4.25 million  
39  
40 126 residents is assigned a unique personal health number (PHN) at birth or upon immigration to the province  
41  
42 127 [15]. The PHN is recorded each time a person accesses the healthcare system, allowing for deterministic  
43  
44 128 linkage across multiple administrative data sets held by the Ministry of Health.

45  
46  
47 129 In 2009, influenza vaccination became universally available to all Albertans aged  $\geq 6$  months, regardless of  
48  
49 130 comorbidities or other risk conditions [16]. Influenza vaccines are available at no cost to the patient at public  
50  
51 131 health clinics, pharmacies, physician offices, long-term care facilities, university health centers, and  
52  
53 132 workplaces. Annual vaccine campaigns begin in October, with approximately 60% of all influenza  
54  
55 133 vaccinations given by the end of the second week of the campaign. While the peak of influenza activity has  
56  
57

1  
2  
3 134 varied widely since 2010, the median influenza peak in Alberta is in mid-January, approximately three months  
4  
5 135 after the vaccination campaigns begin.  
6  
7

8 136

### 11 137 **Laboratory methods for influenza A and B detection and influenza A subtyping**

12  
13 138 All influenza testing in Alberta is performed at a single diagnostic lab, the Provincial Laboratory for Public  
14  
15 139 Health (ProvLab) and stored in a single laboratory information system, along with test and patient identifiers.  
16  
17 140 Clinical specimens (e.g. nasopharyngeal swabs, nasopharyngeal aspirates, bronchoalveolar lavages) are  
18  
19 141 processed at ProvLab using previously published protocols. Nucleic acid extraction utilizes the easyMAG  
20  
21 142 extractor and reagents (bioMerieux, St. Laurent, Quebec, Canada)[17]. Nucleic acid from clinical specimens are  
22  
23 143 then tested using a series of respiratory detection assays as described below. Prior to May 2017, a real-time  
24  
25 144 influenza A/B reverse-transcriptase PCR (RT-PCR) was used to diagnose influenza using a protocol  
26  
27 145 previously described [18,19]. After May 2017, ProvLab has been using a Luminex Respiratory Pathogen Panel  
28  
29 146 for the identification of influenza A (including subtype), influenza B, and other respiratory viruses (e.g.  
30  
31 147 coronavirus and parainfluenza) [15]. Results of the laboratory testing were imported into specific laboratory  
32  
33 148 information systems depending on the testing time period.  
34  
35

36 149

### 38 150 **Study Design:**

39  
40  
41 151 We will use the test-negative design to estimate VE. We will estimate VE for the 2011/12 – 2019/20  
42  
43 152 influenza seasons. The results of all respiratory virus tests conducted at ProvLab will be sent to the Ministry  
44  
45 153 of Health for deterministic linkage to health administrative databases, in order to determine eligibility for  
46  
47 154 inclusion in the analysis, influenza vaccination status, and the following covariates: age, sex, socio-economic  
48  
49 155 status, geographic zone of residence, history of immunocompromising comorbidities, healthcare setting  
50  
51 156 (inpatient or outpatient setting), and month at the time of specimen submission. The presence of a diagnostic  
52  
53 157 code for an acute respiratory illness (ARI) at the time of specimen collection will be used in a sensitivity  
54  
55 158 analysis.  
56  
57  
58  
59  
60

1  
2  
3 159 Isolates will be considered eligible for inclusion in the analysis if they met all of the following criteria: a valid  
4  
5 160 PHN is recorded, the isolate is not from a resident of a long-term care facility, the isolate was collected at  
6  
7 161 least four weeks after the initiation of the public influenza vaccination program, and the isolate was collected  
8  
9 162 during the influenza season, as determined using the method recommended by the WHO [20–22].

11  
12 163 It is important to ensure that the population has the chance to be exposed to influenza and there is sufficient  
13  
14 164 time for immunity to the vaccine to be developed. Residence in a long-term care facility will be determined  
15  
16 165 via the Alberta Continuing Care Information System (ACCIS), which contains information on admissions  
17  
18 166 and discharges from long-term care facilities [23]. PHN validity will be assessed using the Alberta Health  
19  
20 167 Care Insurance Plan (AHCIP) Adjusted Population Registry, which contains records of all individuals  
21  
22 168 registered for healthcare insurance [23,24].

23  
24  
25 169 Individuals can have multiple laboratory tests over the course of their illness; therefore only the first positive  
26  
27 170 influenza test during the influenza season will be used, and potential control samples will be selected from  
28  
29 171 among those who only tested negative for influenza during that influenza season, using the first negative test.  
30  
31 172 Cases and controls tested <14 days after vaccination will be excluded from the analysis.

32  
33  
34 173 Influenza vaccination status will be determined from the Influenza Vaccination Registry. The registry  
35  
36 174 combines data from four databases that record influenza vaccination events (see below).

37  
38  
39 175 The following administrative data sets will be used in this study.

- 40  
41  
42 176
- 43 • Alberta Health Immunization and Adverse Reaction to Immunization system (Imm/ARI) contains  
44 records of all publicly funded vaccines administered through public health, including influenza  
45 177 vaccines administered at mass influenza vaccination clinics, public health clinics, and vaccinations  
46 178 administered by public health nurses in long-term care facilities. Data submission is mandatory and  
47 179 administered by public health nurses in long-term care facilities. Data submission is mandatory and  
48 179 guidelines exist to support complete and accurate vaccination records with descriptions of each,  
49 180 including notes [25,26].  
50  
51  
52  
53 181
- 54  
55  
56  
57  
58  
59  
60

- 1  
2  
3 182 • The Supplemental Enhanced Service Event (SESE) database captures physician claims for billing  
4  
5 183 purposes; International Classification of Diseases, Ninth Revision (ICD-9) diagnosis codes,  
6  
7 184 procedure codes (Canadian Classification of Procedures), codes indicating location of service  
8  
9 185 delivery, and a number of other administrative elements used to support the payment for each  
10  
11 186 patient encounter [24,27,28].
- 13  
14 187 • Alberta Blue Cross (ABC) administers the pharmacist component of the universal vaccination  
15  
16 188 program. Pharmacists administering influenza vaccines through this program submit claims to ABC  
17  
18 189 for each vaccine provided; they are required to submit patient information such as PHN, date of  
19  
20 190 service, name, and address.
- 21  
22 191 • The Pharmaceutical Information Network (PIN) database records dispensed pharmacological  
23  
24 192 products, regardless of payer, including the rare instances when an influenza vaccine is purchased  
25  
26 193 rather than administered through the public program (e.g. purchased by travelers prior to the launch  
27  
28 194 of the public campaign). PIN captures approximately 95% of all dispensed events in the province  
29  
30 195 [23].
- 31  
32 196 • Provincial Vaccine Registry combines influenza vaccinations given in the province and recorded in  
33  
34 197 four source databases (PIN, ABC, SESE and Imm/ARI).
- 35  
36 198 • Alberta Health Care Insurance Plan (AHCIP) Population Registry contains demographic variables,  
37  
38 199 age, sex, socio-economic status, and geographic zone of residence. Neighbourhood-level socio-  
39  
40 200 economic status is derived from census dissemination area income quintiles using postal code.
- 41  
42 201 • Morbidity and Ambulatory Care Abstracting Reporting (MACAR) system contains ICD-10-CA  
43  
44 202 diagnostic codes, procedure codes, the date of admission, and date of discharge for every visit to  
45  
46 203 hospitals, emergency rooms, and outpatient clinics.

47  
48  
49  
50 204 The quality of administrative datasets in Alberta has been extensively reviewed [29–31].

51  
52  
53 205 Individuals will be considered inpatients if they have at least one physician claim for inpatient services on  
54  
55 206 the same day as specimen collection or if specimen collection occurred during an inpatient stay; all others



1  
2  
3 207 will be considered outpatients. Individuals with an immunocompromising condition will be defined as  
4  
5 208 those who have a diagnosis of HIV, who received an organ transplant, or received oral corticosteroids  
6  
7 209 (for  $\geq 30$  days), antineoplastic agents, or another immunocompromising drug from a community  
8  
9 210 pharmacist in the past 6 months. (Appendix 1 and 2) [32]. HIV diagnosis and ARI will be determined  
10  
11 211 through physician claims and MACAR. Organ transplantation will be determined using MACAR, and  
12  
13 212 immunocompromising drug dispensations will be identified through PIN.

### 16 213 **Statistical Analysis**

19 214 Vaccine effectiveness data will be refreshed and the analysis completed every two weeks until the peak of the  
20  
21 215 influenza season and monthly thereafter. We will use multivariable logistic regression to estimate influenza  
22  
23 216 vaccine effectiveness as  $(1 - \text{adjusted OR}) \times 100\%$  and will compare the results to historical values of VE for  
24  
25 217 the predominate subtype. We will estimate VE separately by influenza season and influenza subtype (i.e.,  
26  
27 218 A(H3N2), A(H1N1)pdm09, and influenza B) [33]. When there is a large enough sample size in a particular  
28  
29 219 season to provide adequate power, VE will be estimated for specific age groups such as children under the  
30  
31 220 age of 5 and seniors over the age of 65. The following covariates will be included in the adjusted model,  
32  
33 221 regardless of statistical significance: age, sex, socio-economic status, geographic zone of residence, history of  
34  
35 222 immunocompromising comorbidities, healthcare setting (inpatient or outpatient setting), and month of  
36  
37 223 specimen submission within the influenza season. SAS version 9.4 will be used for all statistical analysis (SAS  
38  
39 224 Institute Inc, Cary, NC). VE estimates will be compared to published estimates of VE [6,7,11,13,34,35].  
40  
41  
42  
43 225 As shedding of influenza virus continues for approximately 4-5 days after symptom onset, bias can result if  
44  
45 226 specimens that are collected too long after symptom onset are used [36]. Most studies use a threshold of 7  
46  
47 227 days [37]. To test the robustness of the findings, a sensitivity analysis will be performed; controls will be  
48  
49 228 restricted to those specimens positive for a different respiratory virus (i.e. coronavirus, human respiratory  
50  
51 229 syncytial virus) (As suggested by Sullivan et al 2016).

54 230 A potential limitation to this study is that the samples utilized here are clinical isolates taken through the  
55  
56 231 course of normal patient care, and are not from a standard case definition as is utilized in some other studies

1  
2  
3 232 [12]. To test the robustness of the findings, the analysis will be repeated using only cases and controls that  
4  
5 233 were given a diagnosis code for ARI on the same day as specimen collection, as per the SESE database or  
6  
7 234 MACAR. Appendix 3 lists the ICD-9 and ICD-10 codes used to define ARIs.  
8  
9

10 235

## 13 236 **PATIENT AND PUBLIC INVOLVEMENT**

16 237 Patients and the public were not involved in the design of the study, including the development of the  
17  
18 238 research question, outcomes measures, recruitment to or conduct of the study. The results of the study will  
19  
20 239 be disseminated to the public as deemed appropriate by public health officials.  
21  
22

23 240

## 26 241 **DISCUSSION**

28 242 This protocol describes the estimation of seasonal influenza VE using specimens collected for routine  
29  
30 243 influenza diagnostics as well as administrative data and vaccination records.  
31  
32

33 244 A key strength of this approach is the large sample size. This approach allows calculation of timely, precise  
34  
35 245 influenza VE estimates weeks prior to the influenza season peak, creating an early warning system for public  
36  
37 246 health if, as in the 2014-2015 season, the vaccine is found to have exceedingly low effectiveness. Early  
38  
39 247 notification of VE can assist public health in determining policies, messaging, and allocation of resources  
40  
41 248 (antiviral agents, staffing emergency departments) to counter a potentially more severe influenza season  
42  
43 249 [37,38]. The large sample size also allows for stratified analyses of VE based on product, age group, or region.

46 250 Whereas sentinel physician networks rely primarily on self-reported measures of influenza vaccination [34], a  
47  
48 251 significant strength of this study is the use of the near-real-time influenza vaccination registry that contains  
49  
50 252 individual-level, linkable data for most influenza vaccinations administered in the province. Use of this  
51  
52 253 registry reduces the likelihood of recall error and information biases such as social desirability bias and  
53  
54  
55  
56  
57  
58  
59  
60

1  
2  
3 254 reduces non-differential misclassification, which would bias the odds ratio towards the null, thus  
4  
5 255 underestimating VE [12].  
6  
7

8 256 Finally, we are certain to capture the results of all respiratory virus testing in the province, as all respiratory  
9  
10 257 virus testing is centralized at ProvLab and there is limited use of point-of-care testing.  
11  
12

13 258 There are some limitations to this methodology compared to the traditional method of VE estimation using  
14  
15 259 sentinel physician networks, because a standardized clinical case definition cannot be applied to determine  
16  
17 260 study eligibility. A sensitivity analysis restricting to healthcare encounters with a diagnosis code for ARI will  
18  
19 261 be used as a proxy for a standard case definition.  
20  
21

22 262 While the inclusion of confounders is important for VE estimate adjustment, not all known confounders can  
23  
24 263 be measured using administrative data. Frailty has been demonstrated to be a potential confounder of VE  
25  
26 264 [39–41]. Frailty cannot be included in the multivariable model because no validated indices of frailty  
27  
28 265 generated from standard administrative data exist at this time. However, this may not affect the results  
29  
30 266 significantly as a previous study indicated that inclusion of frailty in the multivariate model increased VE  
31  
32 267 estimates only slightly [42].  
33  
34

35 268 Laboratory requisitions in Alberta do not contain illness onset date. Ideally this would be used to ensure that  
36  
37 269 the negative laboratory test results were representative of an acute infectious period and that test-negative  
38  
39 270 specimens were not collected after viral shedding had ceased. Sullivan et al 2016 have indicated this bias may  
40  
41 271 be accounted for by selecting influenza test-negative controls that were positive for another respiratory virus.  
42  
43 272 Requiring controls to be positive for another virus excludes individuals who are tested long after their acute  
44  
45 273 infectious period. However, a recent systematic review found no differences when using different groups of  
46  
47 274 controls [43].  
48  
49

50  
51 275 Comparison of the VE results using administrative data to previously published studies, specifically sentinel  
52  
53 276 surveillance for the same seasons (2011/12 – 2018/19) will help to identify further areas of refinement.  
54  
55  
56  
57  
58  
59  
60

1  
2  
3 277 This approach could successfully allow for the generation of early influenza VE estimates which could  
4  
5 278 facilitate tailoring of public health messaging and assist in public health operations planning for the peak of  
6  
7 279 the influenza season.  
8

9 280

## 11 281 **ETHICS**

13 282 Ethics approval was obtained from the University of Alberta's Health Research Ethics Board – Health Panel  
14  
15 283 under study ID Pro00075997.  
16

17 284

## 19 285 **LIST OF ABBREVIATIONS**

21 286 ABC – Alberta Blue Cross

23 287 ACCIS – Alberta Continuing Care Information System

25 288 AHCIP – Alberta Health Care Insurance Plan Adjusted Population Registry

27 289 CCI – Canadian Classification of Health Interventions

29 290 CCP – Canadian Classification of Diagnostic, Therapeutic, and Surgical Procedures

31 291 ICD-9 – International Classification of Diseases, Ninth Revision

33 292 ICD-10 – International Classification of Diseases, Tenth Revision

35 293 Imm/ARI – Alberta Health Immunization and Adverse Reaction to Immunization system

37 294 MACAR – Morbidity and Ambulatory Care Abstracting Reporting

39 295 PHN – Personal Health Number

41 296 PIN – Pharmaceutical Information Network

43 297 ProvLab – Alberta Provincial Laboratory for Public Health

45 298 RT-PCR – Reverse Transcriptase Polymerase Chain Reaction

47 299 SESE – Supplemental Enhance Service Event

49 300 VE – Vaccine Effectiveness

51 301

## 53 302 **ETHICS APPROVAL AND CONSENT TO PARTICIPATE**

1  
2  
3 303 Ethics approval was obtained from the University of Alberta's Health Research Ethics Board – Health Panel  
4  
5 304 under study ID Pro00075997.  
6

7 305

8  
9 306 **CONSENT FOR PUBLICATION**

10  
11 307 Not applicable  
12  
13

14 308

15  
16  
17 309 **AVAILABILITY OF DATA AND MATERIALS**

18  
19 310 Not applicable  
20  
21

22 311

23  
24 312 **COMPETING INTERESTS**

25  
26 313 The authors declare that they have no competing interests.  
27  
28

29 314

30  
31 315 **FUNDING**

32  
33 316 Not applicable  
34  
35

36 317

37  
38 318 **AUTHOR STATEMENT**

39 319 ANS and SJD conceived of and designed the protocol and drafted and revised the manuscript. KS and LS  
40 320 planned the original approach, providing guidance on available administrative database resources. SAB and  
41 321 JCK made substantial contributions to the design and critically revised the manuscript.  
42  
43

44 322

45 323

46  
47  
48 324 **ACKNOWLEDGEMENTS**

49  
50 325 The authors would like to acknowledge the staff at Alberta Health Services and ProvLab for their assistance  
51 326 in providing administrative and laboratory data sources that could be implemented in this protocol.  
52

53 327 **LICENCE STATEMENT**  
54  
55  
56  
57  
58  
59  
60

1  
2  
3 328 \* I, the Submitting Author has the right to grant and does grant on behalf of all authors of the Work (as  
4 329 defined in the below author licence), an exclusive licence and/or a non-exclusive licence for  
5  
6 330 contributions from authors who are: i) UK Crown employees; ii) where BMJ has agreed a CC-BY licence  
7 331 shall apply, and/or iii) in accordance with the terms applicable for US Federal Government officers or  
8 332 employees acting as part of their official duties; on a worldwide, perpetual, irrevocable, royalty-free  
9  
10 333 basis to BMJ Publishing Group Ltd (“BMJ”) its licensees and where the relevant Journal is co-owned by  
11 334 BMJ to the co-owners of the Journal, to publish the Work in BMJ Open and any other BMJ products and  
12 335 to exploit all rights, as set out in our [licence](#).  
13  
14 336

15 337 The Submitting Author accepts and understands that any supply made under these terms is made by  
16 338 BMJ to the Submitting Author unless you are acting as an employee on behalf of your employer or a  
17 339 postgraduate student of an affiliated institution which is paying any applicable article publishing charge  
18 340 (“APC”) for Open Access articles. Where the Submitting Author wishes to make the Work available on an  
19 341 Open Access basis (and intends to pay the relevant APC), the terms of reuse of such Open Access shall  
20 342 be governed by a Creative Commons licence – details of these licences and which [Creative Commons](#)  
21 343 licence will apply to this Work are set out in our licence referred to above.  
22  
23  
24  
25  
26  
27  
28  
29  
30  
31  
32  
33  
34  
35  
36  
37  
38  
39  
40  
41  
42  
43  
44  
45  
46  
47  
48  
49  
50  
51  
52  
53  
54  
55  
56  
57  
58  
59  
60

## 344 REFERENCES

- 345 1 Mertz D, Tae HK, Johnstone J, *et al.* Populations at risk for severe or complicated influenza illness:  
346 systematic review and meta-analysis. *BMJ* 2013;**347**:10.
- 347 2 Alberta Health Services. Alberta Health Services. 2017.
- 348 3 Wong S-S, Webby RJ. Traditional and new influenza vaccines. *Clin Microbiol Rev* 2013;**26**:476–92.  
349 doi:10.1128/CMR.00097-12
- 350 4 Skowronski DM, Chambers C, Sabaiduc S, *et al.* A Perfect Storm: Impact of Genomic Variation and  
351 Serial Vaccination on Low Influenza Vaccine Effectiveness During the 2014-2015 Season. *Clin Infect*  
352 *Dis An Off Publ Infect Dis Soc Am* 2016;**63**:21–32. doi:10.1093/cid/ciw176
- 353 5 World Health Organization. Influenza Update N ° 309. 2018;**2018**:1–8.
- 354 6 Skowronski DM, De Serres G, Crowcroft NS, *et al.* Association between the 2008-09 seasonal  
355 influenza vaccine and pandemic H1N1 illness during Spring-Summer 2009: four observational studies  
356 from Canada. *PLoS Med* 2010;**e1000258**. doi:10.1371/journal.pmed.1000258
- 357 7 Chambers C, Skowronski DM, Sabaiduc S, *et al.* Interim estimates of 2015/16 vaccine effectiveness  
358 against influenza A(H1N1)pdm09, Canada, February 2016. *Euro Surveill Bull Eur Sur Les Mal Transm =*  
359 *Eur Commun Dis Bull* 2016;**21**:30168. doi:10.2807/1560-7917.ES.2016.21.11.30168
- 360 8 Kwong JC, Campitelli MA, Gubbay JB, *et al.* Vaccine effectiveness against laboratory-confirmed  
361 influenza hospitalizations among elderly adults during the 2010-2011 season. *Clin Infect Dis An Off Publ*  
362 *Infect Dis Soc Am* 2013;**57**:820–7. doi:10.1093/cid/cit404
- 363 9 Orenstein WA, Bernier RH, Dondero TJ, *et al.* Field evaluation of vaccine efficacy. *Bull World Health*  
364 *Organ* 1985;**63**:1055–68.
- 365 10 Public Health Agency of Canada. Effectiveness of Vaccine Against Medical Consultation Due to  
366 Laboratory-Confirmed Influenza: Results From a Sentinel Physician Pilot Project in British Columbia,  
367 2004-2005. *Can Commun Dis Rep* 2005;**31**:181–91.
- 368 11 Skowronski DM, Chambers C, Sabaiduc S, *et al.* Interim estimates of 2016/17 vaccine effectiveness  
369 against influenza A(H3N2), Canada, January 2017. *Euro Surveill Bull Eur Sur Les Mal Transm = Eur*  
370 *Commun Dis Bull* 2017;**22**. doi:10.2807/1560-7917.ES.2017.22.6.30460
- 371 12 World Health Organization (WHO). Evaluation of influenza vaccine effectiveness: A guide to the  
372 design and interpretation of observational studies. 2017;**1**:1–47.
- 373 13 Belongia EA, Simpson MD, King JP, *et al.* Variable influenza vaccine effectiveness by subtype: a  
374 systematic review and meta-analysis of test-negative design studies. *Lancet Infectious Dis* 2016;**16**:942–51.  
375 doi:10.1016/S1473-3099(16)00129-8
- 376 14 Kwong JC, Buchan SA, Chung H, *et al.* Can routinely collected laboratory and health administrative  
377 data be used to assess influenza vaccine effectiveness? Assessing the validity of the Flu and Other  
378 Respiratory Viruses Research (FOREVER) Cohort. *Vaccine* Published Online First: 17 June 2019.  
379 doi:10.1016/j.vaccine.2019.06.011
- 380 15 Fathima S, Simmonds K, Invik J, *et al.* Use of laboratory and administrative data to understand the  
381 potential impact of human parainfluenza virus 4 on cases of bronchiolitis, croup, and pneumonia in  
382 Alberta, Canada. *BMC Infect Dis* 2016;**16**. doi:10.1186/s12879-016-1748-z

- 1  
2  
3 383 16 Government of Alberta. Alberta Health: History of immunization in Alberta. 2017.  
4  
5 384 17 Pabbaraju K, Tokaryk KL, Wong S, *et al*. Comparison of the luminex xTAG respiratory viral panel  
6 385 with in-house nucleic acid amplification tests for diagnosis of respiratory virus infections. *J Clin*  
7 386 *Microbiol* 2008;**46**:3056–62. doi:10.1128/JCM.00878-08  
8  
9 387 18 Pabbaraju K, Wong S, Wong AA, *et al*. Design and validation of real-time reverse transcription-PCR  
10 388 assays for detection of pandemic (H1N1) 2009 virus. *J Clin Microbiol* 2009;**47**:3454–60.  
11 389 doi:10.1128/JCM.01103-09  
12  
13 390 19 Chaudhry A, Bastien N, Li Y, *et al*. Oseltamivir resistance in an influenza A (H3N2) virus isolated  
14 391 from an immunocompromised patient during the 2014-2015 influenza season in Alberta, Canada.  
15 392 *Influenza Other Respi Viruses* 2016;**10**:532–5. doi:10.1111/irv.12415  
16  
17 393 20 World Health Organization. Global epidemiological surveillance standards for influenza. 2013.  
18  
19 394 21 World Health Organization. A Manual for Estimating Disease Burden Associated with Seasonal  
20 395 Influenza. 2015.  
21  
22 396 22 Alberta Health. Alberta Health Seasonal Influenza in Alberta 2016/2017 Summary Report. 2017.  
23  
24 397 23 Government of Alberta. Overview of Administrative Health Datasets. 2017.  
25  
26 398 24 Russell ML, Schopflocher DP, Svenson L, *et al*. Secular trends in the epidemiology of shingles in  
27 399 Alberta. *Epidemiol Infect* 2007;**135**:908–13.  
28  
29 400 25 Government of Alberta. Immunization data submission and response guidelines. 2017.  
30  
31 401 26 MacDonald SE, Dover DC, Simmonds KA, *et al*. Risk of febrile seizures after first dose of measles-  
32 402 mumps-rubella- varicella vaccine: A population-based cohort study. *CMAJ* 2014;**186**:824–9.  
33 403 doi:10.1503/cmaj.140078  
34  
35 404 27 Alberta Health. Alberta Health Claims Assessment.  
36 405 2017. <https://open.alberta.ca/publications/alberta-health-diagnostic-codes> (accessed 23 Feb 2018).  
37  
38 406 28 Lix LM, Walker R, Quan H, *et al*. Features of physician services databases in Canada. *Chronic Dis Inj*  
39 407 *Can* 2012;**32**:186–93.  
40  
41 408 29 Hinds A, Lix LM, Smith M, *et al*. Quality of administrative health databases in Canada: a scoping  
42 409 review. *Can J Public Heal* 2016;**107**:e56--e61.  
43  
44 410 30 Shiff NJ, Jama S, Boden C, *et al*. Validation of administrative health data for the pediatric population:  
45 411 A scoping review. *BMC Health Serv Res* 2014;**14**. doi:10.1186/1472-6963-14-236  
46  
47 412 31 Quan H, Smith M, Bartlett-Esquilant G, *et al*. Mining Administrative Health Databases to Advance  
48 413 Medical Science: Geographical Considerations and Untapped Potential in Canada. *Can J Cardiol*  
49 414 2012;**28**:152–4. doi:10.1016/j.cjca.2012.01.005  
50  
51 415 32 Schwartz KL, Jembere N, Campitelli MA, *et al*. Using physician billing claims from the Ontario Health  
52 416 Insurance Plan to determine individual influenza vaccination status: an updated validation study. *C*  
53 417 *Open* 2016;**4**:E470.  
54  
55 418 33 Sullivan SG, Cowling BJ. ‘Crude Vaccine Effectiveness’ Is a Misleading Term in Test-negative Studies  
56 419 of Influenza Vaccine Effectiveness. *Epidemiology* 2015;**26**:e60. doi:10.1097/EDE.0000000000000343  
57  
58  
59  
60



- 1  
2  
3 420 34 Skowronski DM, Janjua NZ, De Serres G, *et al.* Low 2012-13 influenza vaccine effectiveness  
4 421 associated with mutation in the egg-adapted H3N2 vaccine strain not antigenic drift in circulating  
5 422 viruses. *PLoS One* 2014;**9**:e92153. doi:10.1371/journal.pone.0092153  
6  
7 423 35 Skowronski DM, Chambers C, Sabaiduc S, *et al.* Interim estimates of 2013/14 vaccine effectiveness  
8 424 against influenza A(H1N1)PDM09 from Canada's sentinel surveillance network, January 2014.  
9 425 *Eurosurveillance* 2014;**19**.  
10  
11 426 36 Sullivan SG, Tchetgen Tchetgen J. E, Cowling BJ. Theoretical Basis of the Test-Negative Study  
12 427 Design for Assessment of Influenza Vaccine Effectiveness. *Am J Epidemiol* 2016;**184**:345–53.  
13 428 doi:10.1093/aje/kww064  
14  
15 429 37 Orton L, Lloyd-Williams F, Taylor-Robinson D, *et al.* The use of research evidence in public health  
16 430 decision making processes: systematic review. *PLoS One*;e21704. doi:10.1371/journal.pone.0021704  
17  
18 431 38 Savel TG, Foldy S. The role of public health informatics in enhancing public health surveillance.  
19 432 *MMWR Suppl* 2012;**61**:20–4.  
20  
21 433 39 Nelson JC, Jackson ML, Weiss NS, *et al.* New strategies are needed to improve the accuracy of  
22 434 influenza vaccine effectiveness estimates among seniors. *J Clin Epidemiol* 2009;**62**:687–94.  
23 435 doi:10.1016/j.jclinepi.2008.06.014  
24  
25 436 40 Jackson LA, Jackson ML, Nelson JC, *et al.* Evidence of bias in estimates of influenza vaccine  
26 437 effectiveness in seniors. *Int J Epidemiol* 2006;**35**:337–  
27 438 44.[http://login.ezproxy.library.ualberta.ca/login?url=https://search.ebscohost.com/login.aspx?direct](http://login.ezproxy.library.ualberta.ca/login?url=https://search.ebscohost.com/login.aspx?direct=true&db=cmedm&AN=16368725&site=eds-live&scope=site)  
28 439 [=true&db=cmedm&AN=16368725&site=eds-live&scope=site](http://login.ezproxy.library.ualberta.ca/login?url=https://search.ebscohost.com/login.aspx?direct=true&db=cmedm&AN=16368725&site=eds-live&scope=site)  
29  
30 440 41 Jackson LA, Nelson JC, Benson P, *et al.* Functional status is a confounder of the association of  
31 441 influenza vaccine and risk of all cause mortality in seniors. *Int J Epidemiol* 2006;**35**:345–52.  
32  
33 442 42 Talbot HK, Nian H, Chen Q, *et al.* Evaluating the case-positive, control test-negative study design for  
34 443 influenza vaccine effectiveness for the frailty bias. *Vaccine* 2016;**34**:1806–9.  
35 444 doi:10.1016/j.vaccine.2016.02.037  
36  
37 445 43 Feng S, Cowling BJ, Kelly H, *et al.* Estimating Influenza Vaccine Effectiveness With the Test-  
38 446 Negative Design Using Alternative Control Groups: A Systematic Review and Meta-Analysis. *Am J*  
39 447 *Epidemiol* 2018;**187**:389–97. doi:10.1093/aje/kwx251  
40  
41 448  
42  
43  
44  
45  
46  
47  
48  
49  
50  
51  
52  
53  
54  
55  
56  
57  
58  
59  
60

Supplementary File - Using population-wide administrative and laboratory data to estimate type-  
and subtype-specific influenza vaccine effectiveness: a surveillance protocol

Appendix: List of CCP, CCI, and CMG codes utilized to define individuals who have had an organ  
transplant

**CCP Code Description**

|     |                                     |
|-----|-------------------------------------|
| 495 | Heart Transplantation               |
| 455 | Lung Transplant                     |
| 456 | Combined Heart-Lung Transplantation |
| 624 | Liver Transplant                    |
| 675 | Transplant of Kidney                |
| 648 | Transplant of Pancreas              |

**CCI Code Description**

|       |                                       |
|-------|---------------------------------------|
| 1HY85 | Transplant, Heart With Lung(S)        |
| 1HZ85 | Transplant, Heart Nec                 |
| 1GT85 | Transplant, Lung Nec                  |
| 1GR85 | Transplant, Lobe of Lung              |
| 1OA85 | Transplant, Liver                     |
| 1PC85 | Transplant, Kidney                    |
| 1OJ85 | Transplant, Pancreas                  |
| 1OK85 | Transplant, Pancreas With Duodenum    |
| 1NK85 | Transplant, Small Intestine           |
| 1NP85 | Transplant, Small And Large Intestine |

**CMG 1992 To 2005**

|     |                                        |
|-----|----------------------------------------|
| 175 | Heart or Lung Transplant               |
| 253 | Major Intestinal And Rectal Procedures |
| 310 | Liver Transplant                       |
| 311 | Major Pancreatic Procedures            |
| 500 | Kidney Transplant                      |

**CMG 2007 To 2016**

|     |                                                      |
|-----|------------------------------------------------------|
| 110 | Lung Transplant                                      |
| 160 | Heart Transplant                                     |
| 220 | Major Upper Gastrointestinal Reconstruction/Excision |
| 270 | Liver/Pancreas/Duodenum Transplant                   |
| 450 | Kidney Transplant                                    |

1  
2  
3 **Appendix: List of drug names and DINs utilized to define immunocompromising conditions**  
4  
5

| DIN      | Drug Name                       | Route of Administration | Strength |
|----------|---------------------------------|-------------------------|----------|
| 00616192 | ETOPOSIDE                       | CAP                     | 50MG     |
| 00523410 | ETOPOSIDE                       | IV SOL                  | 20MG/ML  |
| 02080036 | ETOPOSIDE                       | IV SOL                  | 20MG/ML  |
| 02241182 | ETOPOSIDE                       | IV SOL                  | 20MG/ML  |
| 02231622 | IRINOTECAN HCL                  | IV SOL                  | 20MG/ML  |
| 02258218 | IRINOTECAN HCL                  | IV SOL                  | 20MG/ML  |
| 00015431 | VINBLASTINE SULFATE             | IV PWS                  | 1MG/ML   |
| 00611182 | VINCRISTINE SULFATE             | IV SOL                  | 1MG/ML   |
| 02143305 | VINCRISTINE SULFATE             | IV SOL                  | 1MG/ML   |
| 00004618 | BUSULFAN                        | TAB                     | 2MG      |
| 00297763 | CARMUSTINE                      | IV PWS                  | 100MG    |
| 09851399 | CARMUSTINE                      | TOP SOL                 | NOT AVLE |
| 00004626 | CHLORAMBUCIL                    | TAB                     | 2MG      |
| 00344915 | CYCLOPHOSPHAMIDE                | INJ PWS                 | 2GM      |
| 00013544 | CYCLOPHOSPHAMIDE                | IV PWS                  | 200MG    |
| 00013552 | CYCLOPHOSPHAMIDE                | IV PWS                  | 200MG    |
| 02241797 | CYCLOPHOSPHAMIDE                | IV PWS                  | 200MG    |
| 02241799 | CYCLOPHOSPHAMIDE                | IV PWS                  | 1000MG   |
| 00013749 | CYCLOPHOSPHAMIDE                | TAB                     | 50MG     |
| 00262676 | CYCLOPHOSPHAMIDE                | TAB                     | 25MG     |
| 00344877 | CYCLOPHOSPHAMIDE                | TAB                     | 25MG     |
| 00344885 | CYCLOPHOSPHAMIDE                | TAB                     | 50MG     |
| 02241795 | CYCLOPHOSPHAMIDE                | TAB                     | 25MG     |
| 02241796 | CYCLOPHOSPHAMIDE                | TAB                     | 50MG     |
| 02063794 | ESTRAMUSTINE DISODIUM PHOSPHATE | CAP                     | 140MG    |
| 00780278 | ESTRAMUSTINE PHOSPHATE          | CAP                     | 140MG    |
| 00360414 | LOMUSTINE                       | CAP                     | 100MG    |
| 00360422 | LOMUSTINE                       | CAP                     | 40MG     |
| 00360430 | LOMUSTINE                       | CAP                     | 10MG     |
| 00016063 | MECHLORETHAMINE                 | IV PWS                  | 10MG     |
| 00004715 | MELPHALAN                       | TAB                     | 2MG      |
| 02312794 | TEMOZOLOMIDE                    | CAP                     | 140MG    |
| 02312816 | TEMOZOLOMIDE                    | CAP                     | 180MG    |
| 02395274 | TEMOZOLOMIDE                    | CAP                     | 20MG     |
| 02395282 | TEMOZOLOMIDE                    | CAP                     | 100MG    |
| 02395290 | TEMOZOLOMIDE                    | CAP                     | 140MG    |
| 02395312 | TEMOZOLOMIDE                    | CAP                     | 250MG    |
| 02443473 | TEMOZOLOMIDE                    | CAP                     | 5MG      |
| 02443481 | TEMOZOLOMIDE                    | CAP                     | 20MG     |

| DIN      | Drug Name             | Route of Administration | Strength |
|----------|-----------------------|-------------------------|----------|
| 02443511 | TEMOZOLOMIDE          | CAP                     | 100MG    |
| 02443538 | TEMOZOLOMIDE          | CAP                     | 140MG    |
| 02443554 | TEMOZOLOMIDE          | CAP                     | 250MG    |
| 02241093 | TEMOZOLOMIDE          | CAP                     | 5MG      |
| 02241094 | TEMOZOLOMIDE          | CAP                     | 20MG     |
| 02241095 | TEMOZOLOMIDE          | CAP                     | 100MG    |
| 02241096 | TEMOZOLOMIDE          | CAP                     | 250MG    |
| 02441160 | TEMOZOLOMIDE          | CAPSULE                 | 5MG      |
| 00237035 | THIOTEPA              | INJ PWS                 | 15MG/ML  |
| 02421917 | CAPECITABINE          | FC TAB                  | 150MG    |
| 02421925 | CAPECITABINE          | FC TAB                  | 500MG    |
| 02426757 | CAPECITABINE          | FC TAB                  | 150MG    |
| 02426765 | CAPECITABINE          | FC TAB                  | 500MG    |
| 02400022 | CAPECITABINE          | TAB                     | 150MG    |
| 02400030 | CAPECITABINE          | TAB                     | 500MG    |
| 02238453 | CAPECITABINE          | TAB                     | 150MG    |
| 02238454 | CAPECITABINE          | TAB                     | 500MG    |
| 02022117 | CLADRIBINE            | IV SOL                  | 1MG      |
| 00194727 | CYTARABINE            | INJ PWS                 | 500MG    |
| 00386715 | CYTARABINE            | INJ PWS                 | 100MG    |
| 02167867 | CYTARABINE            | INJ PWS                 | 100MG    |
| 00646296 | CYTARABINE            | IV PWS                  | 1GM      |
| 00646318 | CYTARABINE            | IV PWS                  | 2GM      |
| 02246226 | FLUDARABINE PHOSPHATE | TAB                     | 10MG     |
| 00012882 | FLUOROURACIL          | IV SOL                  |          |
| 00330582 | FLUOROURACIL          | TOP CRM                 | 5%       |
| 00465283 | HYDROXYUREA           | CAP                     | 500MG    |
| 02242920 | HYDROXYUREA           | CAP                     | 500MG    |
| 02247937 | HYDROXYUREA           | CAP                     | 500MG    |
| 00004723 | MERCAPTOPURINE        | TAB                     | 50MG     |
| 02415275 | MERCAPTOPURINE        | TABLET                  | 50MG     |
| 09857520 | METHOTREXATE          | INJ SOL                 | 50MG/2ML |
| 02182777 | METHOTREXATE          | INJ SOL                 | 25MG/ML  |
| 02182955 | METHOTREXATE          | INJ SOL                 | 25MG/ML  |
| 00014915 | METHOTREXATE          | TAB                     | 2.5MG    |
| 02170698 | METHOTREXATE          | TAB                     | 2.5MG    |
| 02182750 | METHOTREXATE          | TAB                     | 10MG     |
| 02182963 | METHOTREXATE          | TAB                     | 2.5MG    |
| 02244798 | METHOTREXATE          | TAB                     | 2.5MG    |
| 02398427 | METHOTREXATE          | VIAL                    | 25MG/ML  |
| 00321397 | METHOTREXATE DISODIUM | INJ SOL                 | 2.5MG/ML |
| 00321400 | METHOTREXATE DISODIUM | INJ SOL                 | 2.5MG/ML |

1  
2  
3  
4  
5  
6  
7  
8  
9  
10  
11  
12  
13  
14  
15  
16  
17  
18  
19  
20  
21  
22  
23  
24  
25  
26  
27  
28  
29  
30  
31  
32  
33  
34  
35  
36  
37  
38  
39  
40  
41  
42  
43  
44  
45  
46  
47  
48  
49  
50  
51  
52  
53  
54  
55  
56  
57  
58  
59  
60

| DIN      | Drug Name              | Route of Administration | Strength   |
|----------|------------------------|-------------------------|------------|
| 02170663 | METHOTREXATE DISODIUM  | INJ SOL                 | 50MG/2ML   |
| 02170671 | METHOTREXATE DISODIUM  | INJ SOL                 | 2.5MG/ML   |
| 02182947 | METHOTREXATE SODIUM    | INJ SOL                 | 10MG/ML    |
| 00614335 | METHOTREXATE SODIUM    | IV SOL                  | 10MG/ML    |
| 00874132 | METHOTREXATE SODIUM    | TAB                     | 2.5MG      |
| 02171767 | METHOTREXATE SODIUM    | TAB                     | 2.5MG      |
| 00282081 | THIOGUANINE            | TAB                     | 40MG       |
| 02384256 | CRIZOTINIB             | CAP                     | 200MG      |
| 02384264 | CRIZOTINIB             | CAP                     | 250MG      |
| 02409607 | DABRAFENIB             | CAP                     | 50MG       |
| 02409615 | DABRAFENIB             | CAP                     | 75MG       |
| 02320193 | DASATINIB              | TAB                     | 100MG      |
| 02293129 | DASATINIB              | TAB                     | 20MG       |
| 02293137 | DASATINIB              | TAB                     | 50MG       |
| 02293145 | DASATINIB              | TAB                     | 70MG       |
| 02269007 | ERLOTINIB HCL          | TAB                     | 25MG       |
| 02269015 | ERLOTINIB HCL          | TAB                     | 100MG      |
| 02269023 | ERLOTINIB HCL          | TAB                     | 150MG      |
| 02377705 | ERLOTINIB HCL          | TABLET                  | 100MG      |
| 02377713 | ERLOTINIB HCL          | TABLET                  | 150MG      |
| 02434407 | IBRUTINIB              | CAP                     | 140MG      |
| 09857447 | IMATINIB MESYLATE      | TAB                     | 100MG      |
| 02388006 | RUXOLITINIB            | TAB                     | 5MG        |
| 02388014 | RUXOLITINIB            | TAB                     | 15MG       |
| 02388022 | RUXOLITINIB            | TAB                     | 20MG       |
| 02409658 | TRAMETINIB RECOMBINANT | TAB                     | 2MG        |
| 01926438 | ASPARAGINASE           | INJ PWS                 | 10MU       |
| 02389649 | AXITINIB               | TAB                     | 5MG        |
| 02389630 | AXITINIB               | TAB FC                  | 1MG        |
| 02262452 | BORTEZOMIB             | IV PWS                  | 3.5MG      |
| 00521183 | DACARBAZINE            | IV PWS                  | 200MG/VIAL |
| 02154854 | DACARBAZINE            | IV PWS                  | 200MG      |
| 02248676 | GEFITINIB              | TAB                     | 250MG      |
| 02244725 | IMATINIB MESYLATE      | CAP                     | 100MG      |
| 02399806 | IMATINIB MESYLATE      | FC TAB                  | 100MG      |
| 02355337 | IMATINIB MESYLATE      | TAB                     | 100MG      |
| 02355345 | IMATINIB MESYLATE      | TAB                     | 400MG      |
| 02397285 | IMATINIB MESYLATE      | TAB                     | 100MG      |
| 02397293 | IMATINIB MESYLATE      | TAB                     | 400MG      |
| 02399814 | IMATINIB MESYLATE      | TAB                     | 400MG      |
| 02431114 | IMATINIB MESYLATE      | TAB                     | 100MG      |
| 02431122 | IMATINIB MESYLATE      | TAB                     | 400MG      |

| DIN      | Drug Name              | Route of Administration | Strength   |
|----------|------------------------|-------------------------|------------|
| 09857448 | IMATINIB MESYLATE      | TAB                     | 400MG      |
| 02253275 | IMATINIB MESYLATE      | TAB                     | 100MG      |
| 02253283 | IMATINIB MESYLATE      | TAB                     | 400MG      |
| 02326442 | LAPATINIB DITOSYLATE   | TAB                     | 250MG      |
| 02315874 | NILOTINIB              | CAP                     | 200MG      |
| 02368250 | NILOTINIB              | CAP                     | 150MG      |
| 02352303 | PAZOPANIB HCL          | TAB                     | 200MG      |
| 00012750 | PROCARBAZINE HCL       | CAP                     | 50MG       |
| 02403390 | REGORAFENIB            | TAB                     | 40MG       |
| 02284227 | SORAFENIB TOSYLATE     | TAB                     | 200MG      |
| 02280795 | SUNITINIB MALATE       | CAP                     | 12.5MG     |
| 02280809 | SUNITINIB MALATE       | CAP                     | 25MG       |
| 02280817 | SUNITINIB MALATE       | CAP                     | 50MG       |
| 02258595 | ADALIMUMAB             | INJ-SC SOL              | 40MG       |
| 09854785 | ADALIMUMAB             | INJ-SC SOL              | 40MG       |
| 09857294 | ADALIMUMAB             | INJ-SC SOL              | 40MG       |
| 09857326 | ADALIMUMAB             | INJ-SC SOL              | 40MG       |
| 09857327 | ADALIMUMAB             | INJ-SC SOL              | 40MG       |
| 02130181 | ALDESLEUKIN            | IV PWS                  | 1.3MG      |
| 02331675 | CERTOLIZUMAB PEGOL     | INJ-SC SOL              | 200MG/ML   |
| 09857394 | ETANERCEPT RECOMBINANT | INJ SOL                 | 50MG/ML    |
| 02242903 | ETANERCEPT RECOMBINANT | INJ-SC PWS              | 25MG       |
| 02274728 | ETANERCEPT RECOMBINANT | INJ-SC SOL              | 50MG/ML    |
| 09857322 | ETANERCEPT RECOMBINANT | INJ-SC SOL              | 50MG/ML    |
| 02233014 | GLATIRAMER             | INJ-SC PWS              | 20MG       |
| 02245619 | GLATIRAMER             | INJ-SC SOL              | 20MG/ML    |
| 02324776 | GOLIMUMAB RECOMBINANT  | INJ-SC SOL              | 50MG/0.5ML |
| 02324784 | GOLIMUMAB RECOMBINANT  | INJ-SC SOL              | 50MG/0.5ML |
| 02244016 | INFLIXIMAB             | IV PWS                  | 100MG      |
| 09852956 | INFLIXIMAB             | IV PWS                  | 100MG      |
| 02419475 | INFLIXIMAB             | PWD VIAL                | 100MG      |
| 02239832 | INTERFERON             | INJ-SC SOL              | 0.03MG/ML  |
| 09852751 | INTERFERON             | OPH SOL                 | 1MU/ML     |
| 02223384 | INTERFERON ALFA 2B     | INJ PWS                 | 3MMU       |
| 02223392 | INTERFERON ALFA 2B     | INJ PWS                 | 5MMU       |
| 02223406 | INTERFERON ALFA 2B     | INJ PWS                 | 10MMU      |
| 02231651 | INTERFERON ALFA 2B     | INJ PWS                 | 18MMU      |
| 00889067 | INTERFERON ALFA 2B     | INJ SOL                 | 10MMU/2ML  |
| 02223414 | INTERFERON ALFA 2B     | INJ SOL                 | 10MMU/2ML  |
| 02238674 | INTERFERON ALFA 2B     | INJ SOL                 | 3MMU/0.5ML |
| 02238675 | INTERFERON ALFA 2B     | INJ SOL                 | 5MMU/0.5ML |
| 09853995 | INTERFERON ALFA 2B     | INJ SOL                 | 10MU/VIAL  |

1  
2  
3  
4  
5  
6  
7  
8  
9  
10  
11  
12  
13  
14  
15  
16  
17  
18  
19  
20  
21  
22  
23  
24  
25  
26  
27  
28  
29  
30  
31  
32  
33  
34  
35  
36  
37  
38  
39  
40  
41  
42  
43  
44  
45  
46  
47  
48  
49  
50  
51  
52  
53  
54  
55  
56  
57  
58  
59  
60

| DIN      | Drug Name             | Route of Administration | Strength     |              |
|----------|-----------------------|-------------------------|--------------|--------------|
| 09854045 | INTERFERON ALFA 2B    | INJ SOL                 | 3MMU/0.5ML   |              |
| 09854053 | INTERFERON ALFA 2B    | INJ SOL                 | 5MMU/0.5ML   |              |
| 00705896 | INTERFERON ALFA 2B    | INJ-SC SOL              | 3MMU         |              |
| 00705918 | INTERFERON ALFA 2B    | INJ-SC SOL              | 5MMU         |              |
| 00705926 | INTERFERON ALFA 2B    | INJ-SC SOL              | 10MMU        |              |
| 02240693 | INTERFERON ALFA 2B    | INJ-SC SOL              | 18MMU/1.2ML  |              |
| 02240694 | INTERFERON ALFA 2B    | INJ-SC SOL              | 30MMU/1.2ML  |              |
| 02240695 | INTERFERON ALFA 2B    | INJ-SC SOL              | 60MMU/1.2ML  |              |
| 01911988 | INTERFERON ALFA-2A    | INJ PWS                 | 3000MU/ML    |              |
| 01911996 | INTERFERON ALFA-2A    | INJ PWS                 | 9000MU/ML    |              |
| 01912003 | INTERFERON ALFA-2A    | INJ PWS                 | 6000MU/ML    |              |
| 00812471 | INTERFERON ALFA-2A    | INJ PWS                 | 6000MU/ML    |              |
| 00812498 | INTERFERON ALFA-2A    | INJ SOL                 | 6000MU/ML    |              |
| 00812501 | INTERFERON ALFA-2A    | INJ SOL                 | 3000MU/ML    |              |
| 02217015 | INTERFERON ALFA-2A    | INJ SOL                 | 3000MU/ML    |              |
| 02217031 | INTERFERON ALFA-2A    | INJ SOL                 | 6000MU/ML    |              |
| 02217058 | INTERFERON ALFA-2A    | INJ SOL                 | 9000MU/ML    |              |
| 02217066 | INTERFERON ALFA-2A    | INJ SOL                 | 18000MU/ML   |              |
| 02019914 | INTERFERON ALFA-2A    | INJ SOL                 | 9000MU/ML    |              |
| 01959069 | INTERFERON ALPHA-N1   | INJ SOL                 | 10MU         |              |
| 01959077 | INTERFERON ALPHA-N1   | INJ SOL                 | 3MU          |              |
| 00709042 | INTERFERON ALPHA-N1   | INJ SOL                 | 3MU          |              |
| 00709050 | INTERFERON ALPHA-N1   | INJ SOL                 | 10MU         |              |
| 02169649 | INTERFERON BETA       | INJ-SC PWS              | 0.3MG        |              |
| 02237317 | INTERFERON BETA 1A    | INJ PWS                 | 11MCG        |              |
| 02237318 | INTERFERON BETA 1A    | INJ PWS                 | 44MCG        |              |
| 02237770 | INTERFERON BETA 1A    | INJ-IM PWS              | 30MCG/1.1ML  |              |
| 02269201 | INTERFERON BETA 1A    | INJ-IM SOL              | 30MCG/0.5ML  |              |
| 02318253 | INTERFERON BETA 1A    | INJ-SC SOL              | 66MCG/1.5ML  |              |
| 02318261 | INTERFERON BETA 1A    | INJ-SC SOL              | 132MCG/1.5ML |              |
| 02237319 | INTERFERON BETA 1A    | INJ-SC SOL              | 22MCG/0.5ML  |              |
| 02237320 | INTERFERON BETA 1A    | INJ-SC SOL              | 44MCG/0.5ML  |              |
| 09857395 | INTERFERON BETA-1A    | PREF AUTOINJ PEN        | 30MCG/0.5ML  |              |
| 02337819 | INTERFERON BETA-1B    | RECOMBINANT             | INJ-SC PWS   | 0.3MG        |
| 00846368 | LEVAMISOLE HCL        | TAB                     | 50MG         |              |
| 02234217 | LEVAMISOLE HCL        | TAB                     | 50MG         |              |
| 09857505 | PEGINTERFERON ALFA 2A | RECOMBINANT             | INJ-SC SOL   | 180MCG/0.5ML |
| 02248077 | PEGINTERFERON ALFA 2A | RECOMBINANT             | INJ-SC SOL   | 180MCG/0.5ML |
| 02248078 | PEGINTERFERON ALFA 2A | RECOMBINANT             | INJ-SC SOL   | 180MCG/ML    |

| DIN      | Drug Name         | Route of Administration | Strength |
|----------|-------------------|-------------------------|----------|
| 00258482 | BLEOMYCIN SULFATE | INJ PWS                 | 15U      |
| 00163899 | DAUNORUBICIN HCL  | INJ PD                  | 20MG     |
| 01926683 | DAUNORUBICIN HCL  | IV PWS                  | 20MG     |
| 00353078 | DOXORUBICIN HCL   | IV PWS                  | 50MG     |
| 00357391 | DOXORUBICIN HCL   | IV PWS                  | 10MG     |
| 00640050 | EPIRUBICIN HCL    | INJ PWS                 | 10MG     |
| 00640069 | EPIRUBICIN HCL    | IV PWS                  | 50MG     |
| 00381799 | MITOMYCIN         | IV PWS                  | 5MG      |
| 00463221 | MITOTANE          | TAB                     | 500MG    |
| 02415992 | AFLIBERCEPT       | VIAL                    | 40MG/ML  |
| 02273993 | ALEMTUZUMAB       | IV SOL                  | 10MG/ML  |
| 02290960 | ALEMTUZUMAB       | IV SOL                  | 30MG/ML  |
| 02270994 | BEVACIZUMAB       | IV SOL                  | 25MG/ML  |
| 09857407 | RITUXIMAB         | IV SOL                  | 10MG/ML  |
| 02241927 | RITUXIMAB         | IV SOL                  | 10MG/ML  |



**Appendix: ICD-9 codes and ICD-10 codes utilized to define acute respiratory illness in physician,  
ER and hospital encounters.**

| <b>Description</b>                                                     | <b>ICD-9 Code</b>           | <b>ICD-10 Code</b>         |
|------------------------------------------------------------------------|-----------------------------|----------------------------|
| Viral infection, unspecified site                                      | 079                         | B34                        |
| Viral agents as the cause of diseases<br>classified to other chapters  | --                          | B97 (but not B973 or B977) |
| Acute nasopharyngitis (common cold)                                    | 460                         | J00                        |
| Acute sinusitis                                                        | 461                         | J01                        |
| Acute pharyngitis                                                      | 462                         | J02                        |
| Acute tonsillitis                                                      | 463                         | J03                        |
| Acute laryngitis, tracheitis, epiglottitis,<br>croup                   | 464                         | J04, J05                   |
| Acute upper respiratory infections of<br>multiple or unspecified sites | 465                         | J06                        |
| Influenza due to identified novel<br>influenza A virus                 | 488                         | J09                        |
| Influenza                                                              | 487                         | J10, J11                   |
| Pneumonia, organism unspecified                                        | 486                         | --                         |
| Viral pneumonia                                                        | 480                         | J12                        |
| Bacterial pneumonia                                                    | 481, 482                    | J13, J14, J15              |
| Pneumonia due to other specified<br>organism                           | 483                         | J16                        |
| Pneumonia in infectious diseases<br>classified elsewhere               | 484                         | J17                        |
| Bronchopneumonia, organism<br>unspecified                              | 485                         | J18                        |
| Acute bronchitis and bronchiolitis                                     | 466                         | J20, J21                   |
| Unspecified diseases respiratory system                                | 519                         | J22, J39.8, J39.9          |
| Bronchitis, not specified as acute or<br>chronic                       | 490                         | J40                        |
| Acute respiratory distress syndrome                                    | 518.82                      | J80                        |
| Pulmonary edema                                                        | 518.4                       | J81                        |
| Pleural effusion                                                       | 510.9, 511.0, 511.1, 511.89 | J86.9, J90, R09.1          |
| Respiratory failure                                                    | 518.81                      | J96.0, J96.9               |
| Atelectasis                                                            | --                          | J98.10                     |
| Pulmonary collapse                                                     | 518.0                       | J98.19                     |
| Other respiratory disorders                                            | 786.00, 786.09              | J98.0, J98.4, J98.8, J98.9 |
| Hemoptysis                                                             | 786.30                      | R04.2                      |
| Cough                                                                  | 786.2                       | R05                        |
| Shortness of breath (dyspnea)                                          | 786.02, 786.05, 786.09      | R06.0                      |
| Stridor                                                                | 786.1                       | R06.1                      |
| Wheezing                                                               | 786.07                      | R06.2                      |
| Tachypnea                                                              | 786.06                      | R06.4                      |

| Description             | ICD-9 Code                                                   | ICD-10 Code  |
|-------------------------|--------------------------------------------------------------|--------------|
| Chest pain on breathing | 786.52                                                       | R07.1        |
| Hypoxemia               | 799.02                                                       | R09.0        |
| Respiratory arrest      | 799.1                                                        | R09.2        |
| Abnormal sputum         | 786.4                                                        | R09.3        |
| Nasal congestion        | 478.19                                                       | R09.81       |
| Abnormal chest sounds   | 786.7                                                        | R09.89       |
| Fever                   | 780.60                                                       | R50          |
| Chills (without fever)  | 780.64                                                       | R68.0        |
| Sepsis, shock           | 669.11, 669.12, 669.14,<br>785.50, 785.52, 995.91,<br>995.92 | A41.9, R57.9 |

For peer review only
