# Supplementary material for: Using population-wide administrative and laboratory data to estimate type- and subtype-specific influenza vaccine effectiveness: a surveillance protocol
Source: PubMed Central journal article supplement — BMJ Open. 2019 Sep 30;9(9):e029708. doi: 10.1136/bmjopen-2019-029708 (PMC6773297; doi:10.1136/bmjopen-2019-029708), 2019-09-30
Supplement: bmjopen-2019-029708supp001.pdf [file bmjopen-2019-029708supp001.pdf]

**Supplementary File - Using population-wide administrative and laboratory data to estimate type- and subtype-specific influenza vaccine effectiveness: a surveillance protocol**

**Appendix: List of CCP, CCI, and CMG codes utilized to define individuals who have had an organ transplant**

**CCP Code Description**

---

|     |                                     |
|-----|-------------------------------------|
| 495 | Heart Transplantation               |
| 455 | Lung Transplant                     |
| 456 | Combined Heart-Lung Transplantation |
| 624 | Liver Transplant                    |
| 675 | Transplant of Kidney                |
| 648 | Transplant of Pancreas              |

---

**CCI Code Description**

---

|       |                                       |
|-------|---------------------------------------|
| 1HY85 | Transplant, Heart With Lung(S)        |
| 1HZ85 | Transplant, Heart Nec                 |
| 1GT85 | Transplant, Lung Nec                  |
| 1GR85 | Transplant, Lobe of Lung              |
| 1OA85 | Transplant, Liver                     |
| 1PC85 | Transplant, Kidney                    |
| 1OJ85 | Transplant, Pancreas                  |
| 1OK85 | Transplant, Pancreas With Duodenum    |
| 1NK85 | Transplant, Small Intestine           |
| 1NP85 | Transplant, Small And Large Intestine |

---

**CMG 1992 To 2005**

---

|     |                                        |
|-----|----------------------------------------|
| 175 | Heart or Lung Transplant               |
| 253 | Major Intestinal And Rectal Procedures |
| 310 | Liver Transplant                       |
| 311 | Major Pancreatic Procedures            |
| 500 | Kidney Transplant                      |

---

**CMG 2007 To 2016**

---

|     |                                                      |
|-----|------------------------------------------------------|
| 110 | Lung Transplant                                      |
| 160 | Heart Transplant                                     |
| 220 | Major Upper Gastrointestinal Reconstruction/Excision |
| 270 | Liver/Pancreas/Duodenum Transplant                   |
| 450 | Kidney Transplant                                    |

---

**Appendix: List of drug names and DINs utilized to define immunocompromising conditions**

| <b>DIN</b> | <b>Drug Name</b>                   | <b>Route of Administration</b> | <b>Strength</b> |
|------------|------------------------------------|--------------------------------|-----------------|
| 00616192   | ETOPOSIDE                          | CAP                            | 50MG            |
| 00523410   | ETOPOSIDE                          | IV SOL                         | 20MG/ML         |
| 02080036   | ETOPOSIDE                          | IV SOL                         | 20MG/ML         |
| 02241182   | ETOPOSIDE                          | IV SOL                         | 20MG/ML         |
| 02231622   | IRINOTECAN HCL                     | IV SOL                         | 20MG/ML         |
| 02258218   | IRINOTECAN HCL                     | IV SOL                         | 20MG/ML         |
| 00015431   | VINBLASTINE SULFATE                | IV PWS                         | 1MG/ML          |
| 00611182   | VINCRISTINE SULFATE                | IV SOL                         | 1MG/ML          |
| 02143305   | VINCRISTINE SULFATE                | IV SOL                         | 1MG/ML          |
| 00004618   | BUSULFAN                           | TAB                            | 2MG             |
| 00297763   | CARMUSTINE                         | IV PWS                         | 100MG           |
| 09851399   | CARMUSTINE                         | TOP SOL                        | NOT AVLE        |
| 00004626   | CHLORAMBUCIL                       | TAB                            | 2MG             |
| 00344915   | CYCLOPHOSPHAMIDE                   | INJ PWS                        | 2GM             |
| 00013544   | CYCLOPHOSPHAMIDE                   | IV PWS                         | 200MG           |
| 00013552   | CYCLOPHOSPHAMIDE                   | IV PWS                         | 200MG           |
| 02241797   | CYCLOPHOSPHAMIDE                   | IV PWS                         | 200MG           |
| 02241799   | CYCLOPHOSPHAMIDE                   | IV PWS                         | 1000MG          |
| 00013749   | CYCLOPHOSPHAMIDE                   | TAB                            | 50MG            |
| 00262676   | CYCLOPHOSPHAMIDE                   | TAB                            | 25MG            |
| 00344877   | CYCLOPHOSPHAMIDE                   | TAB                            | 25MG            |
| 00344885   | CYCLOPHOSPHAMIDE                   | TAB                            | 50MG            |
| 02241795   | CYCLOPHOSPHAMIDE                   | TAB                            | 25MG            |
| 02241796   | CYCLOPHOSPHAMIDE                   | TAB                            | 50MG            |
| 02063794   | ESTRAMUSTINE DISODIUM<br>PHOSPHATE | CAP                            | 140MG           |
| 00780278   | ESTRAMUSTINE PHOSPHATE             | CAP                            | 140MG           |
| 00360414   | LOMUSTINE                          | CAP                            | 100MG           |
| 00360422   | LOMUSTINE                          | CAP                            | 40MG            |
| 00360430   | LOMUSTINE                          | CAP                            | 10MG            |
| 00016063   | MECHLORETHAMINE                    | IV PWS                         | 10MG            |
| 00004715   | MELPHALAN                          | TAB                            | 2MG             |
| 02312794   | TEMOZOLOMIDE                       | CAP                            | 140MG           |
| 02312816   | TEMOZOLOMIDE                       | CAP                            | 180MG           |
| 02395274   | TEMOZOLOMIDE                       | CAP                            | 20MG            |
| 02395282   | TEMOZOLOMIDE                       | CAP                            | 100MG           |
| 02395290   | TEMOZOLOMIDE                       | CAP                            | 140MG           |
| 02395312   | TEMOZOLOMIDE                       | CAP                            | 250MG           |
| 02443473   | TEMOZOLOMIDE                       | CAP                            | 5MG             |
| 02443481   | TEMOZOLOMIDE                       | CAP                            | 20MG            |

| DIN      | Drug Name             | Route of Administration | Strength |
|----------|-----------------------|-------------------------|----------|
| 02443511 | TEMOZOLOMIDE          | CAP                     | 100MG    |
| 02443538 | TEMOZOLOMIDE          | CAP                     | 140MG    |
| 02443554 | TEMOZOLOMIDE          | CAP                     | 250MG    |
| 02241093 | TEMOZOLOMIDE          | CAP                     | 5MG      |
| 02241094 | TEMOZOLOMIDE          | CAP                     | 20MG     |
| 02241095 | TEMOZOLOMIDE          | CAP                     | 100MG    |
| 02241096 | TEMOZOLOMIDE          | CAP                     | 250MG    |
| 02441160 | TEMOZOLOMIDE          | CAPSULE                 | 5MG      |
| 00237035 | THIOTEPA              | INJ PWS                 | 15MG/ML  |
| 02421917 | CAPECITABINE          | FC TAB                  | 150MG    |
| 02421925 | CAPECITABINE          | FC TAB                  | 500MG    |
| 02426757 | CAPECITABINE          | FC TAB                  | 150MG    |
| 02426765 | CAPECITABINE          | FC TAB                  | 500MG    |
| 02400022 | CAPECITABINE          | TAB                     | 150MG    |
| 02400030 | CAPECITABINE          | TAB                     | 500MG    |
| 02238453 | CAPECITABINE          | TAB                     | 150MG    |
| 02238454 | CAPECITABINE          | TAB                     | 500MG    |
| 02022117 | CLADRIBINE            | IV SOL                  | 1MG      |
| 00194727 | CYTARABINE            | INJ PWS                 | 500MG    |
| 00386715 | CYTARABINE            | INJ PWS                 | 100MG    |
| 02167867 | CYTARABINE            | INJ PWS                 | 100MG    |
| 00646296 | CYTARABINE            | IV PWS                  | 1GM      |
| 00646318 | CYTARABINE            | IV PWS                  | 2GM      |
| 02246226 | FLUDARABINE PHOSPHATE | TAB                     | 10MG     |
| 00012882 | FLUOROURACIL          | IV SOL                  |          |
| 00330582 | FLUOROURACIL          | TOP CRM                 | 5%       |
| 00465283 | HYDROXYUREA           | CAP                     | 500MG    |
| 02242920 | HYDROXYUREA           | CAP                     | 500MG    |
| 02247937 | HYDROXYUREA           | CAP                     | 500MG    |
| 00004723 | MERCAPTOPYRINE        | TAB                     | 50MG     |
| 02415275 | MERCAPTOPYRINE        | TABLET                  | 50MG     |
| 09857520 | METHOTREXATE          | INJ SOL                 | 50MG/2ML |
| 02182777 | METHOTREXATE          | INJ SOL                 | 25MG/ML  |
| 02182955 | METHOTREXATE          | INJ SOL                 | 25MG/ML  |
| 00014915 | METHOTREXATE          | TAB                     | 2.5MG    |
| 02170698 | METHOTREXATE          | TAB                     | 2.5MG    |
| 02182750 | METHOTREXATE          | TAB                     | 10MG     |
| 02182963 | METHOTREXATE          | TAB                     | 2.5MG    |
| 02244798 | METHOTREXATE          | TAB                     | 2.5MG    |
| 02398427 | METHOTREXATE          | VIAL                    | 25MG/ML  |
| 00321397 | METHOTREXATE DISODIUM | INJ SOL                 | 2.5MG/ML |
| 00321400 | METHOTREXATE DISODIUM | INJ SOL                 | 2.5MG/ML |

| DIN      | Drug Name              | Route of Administration | Strength   |
|----------|------------------------|-------------------------|------------|
| 02170663 | METHOTREXATE DISODIUM  | INJ SOL                 | 50MG/2ML   |
| 02170671 | METHOTREXATE DISODIUM  | INJ SOL                 | 2.5MG/ML   |
| 02182947 | METHOTREXATE SODIUM    | INJ SOL                 | 10MG/ML    |
| 00614335 | METHOTREXATE SODIUM    | IV SOL                  | 10MG/ML    |
| 00874132 | METHOTREXATE SODIUM    | TAB                     | 2.5MG      |
| 02171767 | METHOTREXATE SODIUM    | TAB                     | 2.5MG      |
| 00282081 | THIOGUANINE            | TAB                     | 40MG       |
| 02384256 | CRIZOTINIB             | CAP                     | 200MG      |
| 02384264 | CRIZOTINIB             | CAP                     | 250MG      |
| 02409607 | DABRAFENIB             | CAP                     | 50MG       |
| 02409615 | DABRAFENIB             | CAP                     | 75MG       |
| 02320193 | DASATINIB              | TAB                     | 100MG      |
| 02293129 | DASATINIB              | TAB                     | 20MG       |
| 02293137 | DASATINIB              | TAB                     | 50MG       |
| 02293145 | DASATINIB              | TAB                     | 70MG       |
| 02269007 | ERLOTINIB HCL          | TAB                     | 25MG       |
| 02269015 | ERLOTINIB HCL          | TAB                     | 100MG      |
| 02269023 | ERLOTINIB HCL          | TAB                     | 150MG      |
| 02377705 | ERLOTINIB HCL          | TABLET                  | 100MG      |
| 02377713 | ERLOTINIB HCL          | TABLET                  | 150MG      |
| 02434407 | IBRUTINIB              | CAP                     | 140MG      |
| 09857447 | IMATINIB MESYLATE      | TAB                     | 100MG      |
| 02388006 | RUXOLITINIB            | TAB                     | 5MG        |
| 02388014 | RUXOLITINIB            | TAB                     | 15MG       |
| 02388022 | RUXOLITINIB            | TAB                     | 20MG       |
| 02409658 | TRAMETINIB RECOMBINANT | TAB                     | 2MG        |
| 01926438 | ASPARAGINASE           | INJ PWS                 | 10MU       |
| 02389649 | AXITINIB               | TAB                     | 5MG        |
| 02389630 | AXITINIB               | TAB FC                  | 1MG        |
| 02262452 | BORTEZOMIB             | IV PWS                  | 3.5MG      |
| 00521183 | DACARBAZINE            | IV PWS                  | 200MG/VIAL |
| 02154854 | DACARBAZINE            | IV PWS                  | 200MG      |
| 02248676 | GEFITINIB              | TAB                     | 250MG      |
| 02244725 | IMATINIB MESYLATE      | CAP                     | 100MG      |
| 02399806 | IMATINIB MESYLATE      | FC TAB                  | 100MG      |
| 02355337 | IMATINIB MESYLATE      | TAB                     | 100MG      |
| 02355345 | IMATINIB MESYLATE      | TAB                     | 400MG      |
| 02397285 | IMATINIB MESYLATE      | TAB                     | 100MG      |
| 02397293 | IMATINIB MESYLATE      | TAB                     | 400MG      |
| 02399814 | IMATINIB MESYLATE      | TAB                     | 400MG      |
| 02431114 | IMATINIB MESYLATE      | TAB                     | 100MG      |
| 02431122 | IMATINIB MESYLATE      | TAB                     | 400MG      |

| DIN      | Drug Name              | Route of Administration | Strength   |
|----------|------------------------|-------------------------|------------|
| 09857448 | IMATINIB MESYLATE      | TAB                     | 400MG      |
| 02253275 | IMATINIB MESYLATE      | TAB                     | 100MG      |
| 02253283 | IMATINIB MESYLATE      | TAB                     | 400MG      |
| 02326442 | LAPATINIB DITOSYLATE   | TAB                     | 250MG      |
| 02315874 | NILOTINIB              | CAP                     | 200MG      |
| 02368250 | NILOTINIB              | CAP                     | 150MG      |
| 02352303 | PAZOPANIB HCL          | TAB                     | 200MG      |
| 00012750 | PROCARBAZINE HCL       | CAP                     | 50MG       |
| 02403390 | REGORAFENIB            | TAB                     | 40MG       |
| 02284227 | SORAFENIB TOSYLATE     | TAB                     | 200MG      |
| 02280795 | SUNITINIB MALATE       | CAP                     | 12.5MG     |
| 02280809 | SUNITINIB MALATE       | CAP                     | 25MG       |
| 02280817 | SUNITINIB MALATE       | CAP                     | 50MG       |
| 02258595 | ADALIMUMAB             | INJ-SC SOL              | 40MG       |
| 09854785 | ADALIMUMAB             | INJ-SC SOL              | 40MG       |
| 09857294 | ADALIMUMAB             | INJ-SC SOL              | 40MG       |
| 09857326 | ADALIMUMAB             | INJ-SC SOL              | 40MG       |
| 09857327 | ADALIMUMAB             | INJ-SC SOL              | 40MG       |
| 02130181 | ALDESLEUKIN            | IV PWS                  | 1.3MG      |
| 02331675 | CERTOLIZUMAB PEGOL     | INJ-SC SOL              | 200MG/ML   |
| 09857394 | ETANERCEPT RECOMBINANT | INJ SOL                 | 50MG/ML    |
| 02242903 | ETANERCEPT RECOMBINANT | INJ-SC PWS              | 25MG       |
| 02274728 | ETANERCEPT RECOMBINANT | INJ-SC SOL              | 50MG/ML    |
| 09857322 | ETANERCEPT RECOMBINANT | INJ-SC SOL              | 50MG/ML    |
| 02233014 | GLATIRAMER             | INJ-SC PWS              | 20MG       |
| 02245619 | GLATIRAMER             | INJ-SC SOL              | 20MG/ML    |
| 02324776 | GOLIMUMAB RECOMBINANT  | INJ-SC SOL              | 50MG/0.5ML |
| 02324784 | GOLIMUMAB RECOMBINANT  | INJ-SC SOL              | 50MG/0.5ML |
| 02244016 | INFLIXIMAB             | IV PWS                  | 100MG      |
| 09852956 | INFLIXIMAB             | IV PWS                  | 100MG      |
| 02419475 | INFLIXIMAB             | PWD VIAL                | 100MG      |
| 02239832 | INTERFERON             | INJ-SC SOL              | 0.03MG/ML  |
| 09852751 | INTERFERON             | OPH SOL                 | 1MU/ML     |
| 02223384 | INTERFERON ALFA 2B     | INJ PWS                 | 3MMU       |
| 02223392 | INTERFERON ALFA 2B     | INJ PWS                 | 5MMU       |
| 02223406 | INTERFERON ALFA 2B     | INJ PWS                 | 10MMU      |
| 02231651 | INTERFERON ALFA 2B     | INJ PWS                 | 18MMU      |
| 00889067 | INTERFERON ALFA 2B     | INJ SOL                 | 10MMU/2ML  |
| 02223414 | INTERFERON ALFA 2B     | INJ SOL                 | 10MMU/2ML  |
| 02238674 | INTERFERON ALFA 2B     | INJ SOL                 | 3MMU/0.5ML |
| 02238675 | INTERFERON ALFA 2B     | INJ SOL                 | 5MMU/0.5ML |
| 09853995 | INTERFERON ALFA 2B     | INJ SOL                 | 10MU/VIAL  |

| <b>DIN</b> | <b>Drug Name</b>      | <b>Route of Administration</b> | <b>Strength</b> |
|------------|-----------------------|--------------------------------|-----------------|
| 09854045   | INTERFERON ALFA 2B    | INJ SOL                        | 3MMU/0.5ML      |
| 09854053   | INTERFERON ALFA 2B    | INJ SOL                        | 5MMU/0.5ML      |
| 00705896   | INTERFERON ALFA 2B    | INJ-SC SOL                     | 3MMU            |
| 00705918   | INTERFERON ALFA 2B    | INJ-SC SOL                     | 5MMU            |
| 00705926   | INTERFERON ALFA 2B    | INJ-SC SOL                     | 10MMU           |
| 02240693   | INTERFERON ALFA 2B    | INJ-SC SOL                     | 18MMU/1.2ML     |
| 02240694   | INTERFERON ALFA 2B    | INJ-SC SOL                     | 30MMU/1.2ML     |
| 02240695   | INTERFERON ALFA 2B    | INJ-SC SOL                     | 60MMU/1.2ML     |
| 01911988   | INTERFERON ALFA-2A    | INJ PWS                        | 3000MU/ML       |
| 01911996   | INTERFERON ALFA-2A    | INJ PWS                        | 9000MU/ML       |
| 01912003   | INTERFERON ALFA-2A    | INJ PWS                        | 6000MU/ML       |
| 00812471   | INTERFERON ALFA-2A    | INJ PWS                        | 6000MU/ML       |
| 00812498   | INTERFERON ALFA-2A    | INJ SOL                        | 6000MU/ML       |
| 00812501   | INTERFERON ALFA-2A    | INJ SOL                        | 3000MU/ML       |
| 02217015   | INTERFERON ALFA-2A    | INJ SOL                        | 3000MU/ML       |
| 02217031   | INTERFERON ALFA-2A    | INJ SOL                        | 6000MU/ML       |
| 02217058   | INTERFERON ALFA-2A    | INJ SOL                        | 9000MU/ML       |
| 02217066   | INTERFERON ALFA-2A    | INJ SOL                        | 18000MU/ML      |
| 02019914   | INTERFERON ALFA-2A    | INJ SOL                        | 9000MU/ML       |
| 01959069   | INTERFERON ALPHA-N1   | INJ SOL                        | 10MU            |
| 01959077   | INTERFERON ALPHA-N1   | INJ SOL                        | 3MU             |
| 00709042   | INTERFERON ALPHA-N1   | INJ SOL                        | 3MU             |
| 00709050   | INTERFERON ALPHA-N1   | INJ SOL                        | 10MU            |
| 02169649   | INTERFERON BETA       | INJ-SC PWS                     | 0.3MG           |
| 02237317   | INTERFERON BETA 1A    | INJ PWS                        | 11MCG           |
| 02237318   | INTERFERON BETA 1A    | INJ PWS                        | 44MCG           |
| 02237770   | INTERFERON BETA 1A    | INJ-IM PWS                     | 30MCG/1.1ML     |
| 02269201   | INTERFERON BETA 1A    | INJ-IM SOL                     | 30MCG/0.5ML     |
| 02318253   | INTERFERON BETA 1A    | INJ-SC SOL                     | 66MCG/1.5ML     |
| 02318261   | INTERFERON BETA 1A    | INJ-SC SOL                     | 132MCG/1.5ML    |
| 02237319   | INTERFERON BETA 1A    | INJ-SC SOL                     | 22MCG/0.5ML     |
| 02237320   | INTERFERON BETA 1A    | INJ-SC SOL                     | 44MCG/0.5ML     |
| 09857395   | INTERFERON BETA-1A    | PREF AUTOINJ PEN               | 30MCG/0.5ML     |
|            | INTERFERON BETA-1B    |                                |                 |
| 02337819   | RECOMBINANT           | INJ-SC PWS                     | 0.3MG           |
| 00846368   | LEVAMISOLE HCL        | TAB                            | 50MG            |
| 02234217   | LEVAMISOLE HCL        | TAB                            | 50MG            |
|            | PEGINTERFERON ALFA 2A |                                |                 |
| 09857505   | RECOMBINANT           | INJ-SC SOL                     | 180MCG/0.5ML    |
|            | PEGINTERFERON ALFA 2A |                                |                 |
| 02248077   | RECOMBINANT           | INJ-SC SOL                     | 180MCG/0.5ML    |
|            | PEGINTERFERON ALFA 2A |                                |                 |
| 02248078   | RECOMBINANT           | INJ-SC SOL                     | 180MCG/ML       |

| <b>DIN</b> | <b>Drug Name</b>  | <b>Route of Administration</b> | <b>Strength</b> |
|------------|-------------------|--------------------------------|-----------------|
| 00258482   | BLEOMYCIN SULFATE | INJ PWS                        | 15U             |
| 00163899   | DAUNORUBICIN HCL  | INJ PD                         | 20MG            |
| 01926683   | DAUNORUBICIN HCL  | IV PWS                         | 20MG            |
| 00353078   | DOXORUBICIN HCL   | IV PWS                         | 50MG            |
| 00357391   | DOXORUBICIN HCL   | IV PWS                         | 10MG            |
| 00640050   | EPIRUBICIN HCL    | INJ PWS                        | 10MG            |
| 00640069   | EPIRUBICIN HCL    | IV PWS                         | 50MG            |
| 00381799   | MITOMYCIN         | IV PWS                         | 5MG             |
| 00463221   | MITOTANE          | TAB                            | 500MG           |
| 02415992   | AFLIBERCEPT       | VIAL                           | 40MG/ML         |
| 02273993   | ALEMTUZUMAB       | IV SOL                         | 10MG/ML         |
| 02290960   | ALEMTUZUMAB       | IV SOL                         | 30MG/ML         |
| 02270994   | BEVACIZUMAB       | IV SOL                         | 25MG/ML         |
| 09857407   | RITUXIMAB         | IV SOL                         | 10MG/ML         |
| 02241927   | RITUXIMAB         | IV SOL                         | 10MG/ML         |

**Appendix: ICD-9 codes and ICD-10 codes utilized to define acute respiratory illness in physician, ER and hospital encounters.**

| <b>Description</b>                                                  | <b>ICD-9 Code</b>           | <b>ICD-10 Code</b>         |
|---------------------------------------------------------------------|-----------------------------|----------------------------|
| Viral infection, unspecified site                                   | 079                         | B34                        |
| Viral agents as the cause of diseases classified to other chapters  | --                          | B97 (but not B973 or B977) |
| Acute nasopharyngitis (common cold)                                 | 460                         | J00                        |
| Acute sinusitis                                                     | 461                         | J01                        |
| Acute pharyngitis                                                   | 462                         | J02                        |
| Acute tonsillitis                                                   | 463                         | J03                        |
| Acute laryngitis, tracheitis, epiglottitis, croup                   | 464                         | J04, J05                   |
| Acute upper respiratory infections of multiple or unspecified sites | 465                         | J06                        |
| Influenza due to identified novel influenza A virus                 | 488                         | J09                        |
| Influenza                                                           | 487                         | J10, J11                   |
| Pneumonia, organism unspecified                                     | 486                         | --                         |
| Viral pneumonia                                                     | 480                         | J12                        |
| Bacterial pneumonia                                                 | 481, 482                    | J13, J14, J15              |
| Pneumonia due to other specified organism                           | 483                         | J16                        |
| Pneumonia in infectious diseases classified elsewhere               | 484                         | J17                        |
| Bronchopneumonia, organism unspecified                              | 485                         | J18                        |
| Acute bronchitis and bronchiolitis                                  | 466                         | J20, J21                   |
| Unspecified diseases respiratory system                             | 519                         | J22, J39.8, J39.9          |
| Bronchitis, not specified as acute or chronic                       | 490                         | J40                        |
| Acute respiratory distress syndrome                                 | 518.82                      | J80                        |
| Pulmonary edema                                                     | 518.4                       | J81                        |
| Pleural effusion                                                    | 510.9, 511.0, 511.1, 511.89 | J86.9, J90, R09.1          |
| Respiratory failure                                                 | 518.81                      | J96.0, J96.9               |
| Atelectasis                                                         | --                          | J98.10                     |
| Pulmonary collapse                                                  | 518.0                       | J98.19                     |
| Other respiratory disorders                                         | 786.00, 786.09              | J98.0, J98.4, J98.8, J98.9 |
| Hemoptysis                                                          | 786.30                      | R04.2                      |
| Cough                                                               | 786.2                       | R05                        |
| Shortness of breath (dyspnea)                                       | 786.02, 786.05, 786.09      | R06.0                      |
| Stridor                                                             | 786.1                       | R06.1                      |
| Wheezing                                                            | 786.07                      | R06.2                      |
| Tachypnea                                                           | 786.06                      | R06.4                      |



| <b>Description</b>      | <b>ICD-9 Code</b>                                            | <b>ICD-10 Code</b> |
|-------------------------|--------------------------------------------------------------|--------------------|
| Chest pain on breathing | 786.52                                                       | R07.1              |
| Hypoxemia               | 799.02                                                       | R09.0              |
| Respiratory arrest      | 799.1                                                        | R09.2              |
| Abnormal sputum         | 786.4                                                        | R09.3              |
| Nasal congestion        | 478.19                                                       | R09.81             |
| Abnormal chest sounds   | 786.7                                                        | R09.89             |
| Fever                   | 780.60                                                       | R50                |
| Chills (without fever)  | 780.64                                                       | R68.0              |
| Sepsis, shock           | 669.11, 669.12, 669.14,<br>785.50, 785.52, 995.91,<br>995.92 | A41.9, R57.9       |
